# Supplementary material for: Exosomes released from senescent cells and circulatory exosomes isolated from human plasma reveal aging-associated proteomic and lipid signatures
Source: Aging (Albany NY). 2025 Jul 30;17(8):1929–65. doi: 10.18632/aging.206292 (PMC12422824; doi:10.18632/aging.206292)
Supplement: Supplementary Table 6 [file aging-17-8-206292-s007.xls]

## Sheet: Table S6a
Supplementary Table 6A. List of all miRNA identified in the plasma exosome from old and young individuals (Old/Young).
1375 miRNA were identified.
miR_name	miR_seq	up/down	fold_change(Old(mean)/Young)	log2(fold_change)	pvalue (t_test)	# Reads for young	# Reads for old	Expression level
PC-3p-73204_81	TAGCACCATCTGAAATCGGTTAAA	up	5.03902	2.33314	0.00109216	2.13089	10.7376	middle
PC-3p-7719_599	TCGACTCCCGGTATGGGAACCA	up	1.97679	0.98316	0.0206495	28.7919	56.9157	middle
hsa-miR-27a-5p	AGGGCTTAGCTGCTTGTGAGCA	up	3.16937	1.6642	0.0254466	6.80643	21.5721	middle
hsa-miR-874-3p_R+1	CTGCCCTGGCCCGAGGGACCGAC	up	2.08052	1.05695	0.0350409	28.7056	59.7226	middle
hsa-miR-190a-5p_R+1	TGATATGTTTGATATATTAGGTT	down	0.635981	-0.652945	0.0425751	144.654	91.9974	middle
PC-3p-8403_561	TCGACTCCCGGTGTGGGAAC	up	3.608	1.8512	0.0490031	12.184	43.9598	middle
hsa-miR-502-3p	AATGCACCTGGGCAAGGATTCA	down	0.834135	-0.261647	0.0692975	122.956	102.562	middle
hsa-miR-10a-3p_R-1	CAAATTCGTATCTAGGGGAAT	up	3.51738	1.8145	0.0698391	2.82338	9.9309	middle
hsa-miR-3200-3p_R+1	CACCTTGCGCTACTCAGGTCTGA	up	inf	inf	0.0719721	0	2.14799	low
PC-3p-136850_37	CCTGATGGTTGATATTGGC	up	19.2104	4.26381	0.072202	0.320368	6.15439	middle
hsa-miR-210-3p	CTGTGCGTGTGACAGCGGCTGA	up	2.46304	1.30044	0.0832835	22.8552	56.2932	middle
hsa-miR-32-5p	TATTGCACATTACTAAGTTGCA	down	0.685874	-0.543985	0.0841281	237.853	163.137	middle
PC-5p-133888_38	GCACTTGTAACTCAGTGGT	down	0.159705	-2.64652	0.0850794	10.175	1.625	middle
PC-5p-225905_18	AAGTTCTCCAAACTCGGTCA	down	-inf	-inf	0.0859886	8.69474	0	middle
PC-3p-182879_24	CGGGGTCAGCGAGTTCCTT	down	-inf	-inf	0.0863692	8.03826	0	middle
PC-5p-205700_21	GTGTTTAGTACCAGTGAG	down	0.0750581	-3.73585	0.0909403	16.3978	1.23079	middle
PC-3p-249388_16	AAAGTTTTTAAAGCATTAAA	down	-inf	-inf	0.094656	8.56285	0	middle
hsa-miR-548av-3p_L+2	CCAAAACTGCAGTTACTTTTGC	up	3.60721	1.85088	0.100108	1.36156	4.91144	low
PC-5p-141367_35	ACACAATAAGGATTGACAGA	down	0.235467	-2.0864	0.103739	10.6218	2.50107	middle
hsa-miR-139-3p	TGGAGACGCGGCCCTGTTGGAGT	up	2.62967	1.39488	0.10518	8.33375	21.9151	middle
hsa-miR-378c_R-5	ACTGGACTTGGAGTCAGAAG	up	1.69326	0.759801	0.106928	8.63738	14.6253	middle
hsa-miR-4677-3p	TCTGTGAGACCAAAGAACTACT	up	6.6563	2.73472	0.114319	0.320368	2.13246	low
hsa-miR-125a-3p_R-1	ACAGGTGAGGTTCTTGGGAGC	up	6.27414	2.64942	0.114573	2.22042	13.9312	middle
PC-3p-155897_31	TATCATTTAGAGGAAGGTG	down	0.118871	-3.07253	0.115717	6.88393	0.818301	middle
hsa-miR-214-3p_R+1	ACAGCAGGCACAGACAGGCAGTA	up	inf	inf	0.117736	0	4.01842	low
hsa-miR-16-2-3p_L+1R-1	ACCAATATTACTGTGCTGCTTT	down	0.832727	-0.264085	0.117885	1046.45	871.404	high
hsa-miR-18a-3p_1ss23GA	ACTGCCCTAAGTGCTCCTTCTGA	up	1.39036	0.475462	0.119041	29.6285	41.1944	middle
PC-3p-299166_12	CTGCGAATCAAGAGATTGTG	up	inf	inf	0.119785	0	4.6515	middle
PC-3p-319091_11	ATAAACGCTGAAGGCATCT	up	inf	inf	0.123324	0	4.42244	middle
PC-5p-128094_40	AAAGGTGTTGGTTCATAAT	down	0.273094	-1.87253	0.125342	12.5184	3.41869	middle
hsa-miR-345-5p_R+1	GCTGACTCCTAGTCCAGGGCTCT	up	1.38319	0.468003	0.127612	121.118	167.529	middle
hsa-miR-483-5p	AAGACGGGAGGAAAGAAGGGAG	up	2.83277	1.50221	0.130244	5.23923	14.8415	middle
hsa-miR-624-5p	TAGTACCAGTACCTTGTGTTCA	up	2.76362	1.46656	0.130879	3.63829	10.0548	middle
hsa-miR-497-5p	CAGCAGCACACTGTGGTTTGT	up	1.34384	0.426357	0.139139	30.064	40.4011	middle
PC-5p-82121_70	TAGTAAGGATTGACAGATT	down	0.246631	-2.01958	0.148078	23.6808	5.84042	middle
hsa-miR-10b-3p	ACAGATTCGATTCTAGGGGAAT	up	2.54075	1.34525	0.152649	3.10757	7.89555	middle
PC-5p-125551_41	GACTCGGTGAAATAGACTT	down	0.32568	-1.61847	0.153545	19.3639	6.30643	middle
hsa-miR-1180-3p_R-2	TTTCCGGCTCGCGTGGGTGT	up	5.20322	2.3794	0.164684	1.31435	6.83883	middle
hsa-miR-320b_R-2	AAAAGCTGGGTTGAGAGGGC	down	0.769881	-0.377292	0.171423	46.5061	35.8042	middle
hsa-miR-15b-5p	TAGCAGCACATCATGGTTTACA	down	0.737237	-0.439799	0.171616	2426.64	1789.01	high
hsa-miR-15a-5p	TAGCAGCACATAATGGTTTGTG	down	0.760664	-0.39467	0.172224	1689.72	1285.31	high
hsa-miR-429	TAATACTGTCTGGTAAAACCGT	up	4.06285	2.02249	0.175314	0.992346	4.03175	low
PC-5p-672979_5	TGTCTGTTTGAGTGTCATT	up	inf	inf	0.178771	0	3.28791	low
PC-5p-352353_10	CTTTCGCCTGCAAAATCTG	up	inf	inf	0.178771	0	3.28791	low
PC-3p-250861_16	CGCCGCTTTCTGGGCTCGCTCT	down	-inf	-inf	0.179394	1.61583	0	low
hsa-miR-3074-3p_R+1	GATATCAGCTCAGTAGGCACCGA	up	inf	inf	0.180101	0	0.875193	low
hsa-miR-125b-2-3p_L-2R+2	ACAAGTCAGGCTCTTGGGACCT	up	inf	inf	0.180192	0	1.75377	low
PC-5p-317836_11	TCACTTGATTGTATACAGA	down	-inf	-inf	0.180948	4.85019	0	middle
PC-5p-329565_11	CATTTCGTTCAGGCTCTTA	down	-inf	-inf	0.182427	6.14657	0	middle
hsa-miR-26a-2-3p_R-1	CCTATTCTTGATTACTTGTTT	up	4.08493	2.03031	0.18299	1.60184	6.54339	middle
hsa-miR-92a-3p	TATTGCACTTGTCCCGGCCTGT	down	0.861749	-0.214661	0.18434	6031.3	5197.46	high
PC-5p-452378_7	TGTCATAGAGTCCTGAATTG	down	-inf	-inf	0.184365	5.27136	0	middle
PC-5p-423361_7	AACTAAACTCGCTCTTGG	down	-inf	-inf	0.186979	5.29692	0	middle
hsa-miR-142-5p_L+2R-2	CCCATAAAGTAGAAAGCACTA	up	1.18507	0.244974	0.187666	7254.34	8596.91	high
hsa-mir-548h-2-p3	ACCACAATTACTTTTGCACCA	down	-inf	-inf	0.188247	0.363911	0	low
hsa-miR-1255a	AGGATGAGCAAAGAAAGTAGATT	down	-inf	-inf	0.19078	1.58132	0	low
PC-5p-109698_49	AAGTGACAGTGGTTGGACA	down	0.380724	-1.39318	0.192181	23.4945	8.94492	middle
PC-3p-351402_10	TCTTTGTTTGAGTGTGGTAT	down	-inf	-inf	0.192537	5.63594	0	middle
hsa-miR-664b-5p_R-1	TGGGCTAAGGGAGATGATTGGGT	down	-inf	-inf	0.193968	1.63471	0	low
PC-3p-143266_34	AATTAACCAGCCCTGAAAA	down	-inf	-inf	0.19483	20.7665	0	middle
hsa-miR-6837-5p_R+2	ACCAGGGCCAGCAGGGAATGTCT	up	inf	inf	0.195518	0	0.761408	low
PC-3p-295440_12	TTCGCTGGGAATTCAGCCTCT	up	inf	inf	0.197058	0	1.08202	low
hsa-miR-146b-5p_R+1	TGAGAACTGAATTCCATAGGCTGT	up	1.22739	0.295595	0.198255	1584.58	1944.89	high
PC-5p-276778_13	TCTTTGGGGATTGCTTTGA	up	inf	inf	0.200179	0	4.33171	middle
hsa-mir-548a-1-p5_1ss21CT	AAAAGTAATTGTGATTTTTGTC	up	inf	inf	0.201445	0	0.967703	low
PC-5p-275130_14	AAACACAGCACTCTGCAAACA	down	-inf	-inf	0.202319	6.19039	0	middle
hsa-miR-1179_R+1	AAGCATTCTTTCATTGGTTGGT	up	inf	inf	0.202704	0	1.46592	low
hsa-miR-99a-3p_R+1	CAAGCTCGCTTCTATGGGTCTGA	up	inf	inf	0.203702	0	1.65329	low
PC-3p-410137_8	TTAGAGGTTCGGGGGATGT	up	inf	inf	0.204457	0	3.18163	middle
PC-3p-240055_17	AATCCCACTCCTTTCACCA	down	-inf	-inf	0.204459	3.96821	0	middle
hsa-miR-16-1-3p	CCAGTATTAACTGTGCTGCTGA	up	3.22136	1.68767	0.204604	1.7949	5.782	middle
PC-5p-331953_11	TGTTTAGCATCCTGTAGCCTGC	down	-inf	-inf	0.205532	0.940584	0	low
hsa-miR-542-3p	TGTGACAGATTGATAACTGAAA	up	2.06905	1.04897	0.208396	5.80458	12.01	middle
hsa-miR-193b-3p	AACTGGCCCTCAAAGTCCCGCT	up	inf	inf	0.20846	0	0.856797	low
PC-3p-50089_122	TCTCATGGAGAGTTTGATC	up	3.60171	1.84868	0.209223	8.48796	30.5712	middle
PC-5p-400511_8	ATCAGTTGAAGACTAACT	down	-inf	-inf	0.210638	8.22627	0	middle
PC-5p-228264_18	TATTTGTATGAGTTTTAT	up	3.70284	1.88863	0.211306	1.24043	4.59312	middle
PC-3p-284006_13	CTGGCCTGTGTCGTCCTTG	up	inf	inf	0.214841	0	3.04487	middle
PC-3p-400448_8	GGAGTTAGATCATTTGCAG	down	0.0811452	-3.62335	0.215765	8.42651	0.683771	middle
PC-3p-189131_23	CTTTCCTGGTGTTACAATG	down	0.07626	-3.71293	0.217611	7.50504	0.572335	middle
PC-3p-113571_47	AATGTAGATAAGGGAATTC	down	-inf	-inf	0.218006	18.6099	0	middle
hsa-miR-3120-5p_R+2	CCTGTCTGTGCCTGCTGTACAGT	down	-inf	-inf	0.220049	1.24206	0	low
PC-5p-233284_17	AATCCAGCCCTCTCCACCA	down	0.053428	-4.22626	0.220186	7.45392	0.398248	middle
hsa-miR-190a-3p_L+1	ACTATATATCAAACATATTCCT	up	inf	inf	0.220914	0	1.90437	low
hsa-miR-7854-3p_R+1	TGAGGTGACCGCAGATGGGAAG	up	inf	inf	0.220914	0	0.952186	low
hsa-miR-31-5p_R+1_1ss11CT	AGGCAAGATGTTGGCATAGCTG	up	3.73808	1.9023	0.223008	16.5987	62.0474	middle
hsa-miR-124-3p_1ss10CA	TAAGGCACGAGGTGAATGCCAA	up	inf	inf	0.223745	0	6.56502	middle
hsa-miR-16-5p	TAGCAGCACGTAAATATTGGCG	down	0.769737	-0.377563	0.224844	4881.69	3757.61	high
PC-5p-579053_5	GGGATGACTTGTGGTTAGGAG	up	inf	inf	0.227744	0	2.42343	low
PC-5p-388697_8	AAGAGTTCTCTTTTCTTTTT	up	inf	inf	0.227744	0	3.87749	middle
PC-3p-27756_215	AAAAGCACTTTGAAAAGAGG	down	0.385076	-1.37678	0.228542	43.3738	16.7022	middle
PC-3p-309557_12	TTGTAATCTAGAGAGGCTCT	down	-inf	-inf	0.22869	3.10198	0	middle
hsa-miR-29a-3p	TAGCACCATCTGAAATCGGTTA	up	1.25488	0.327554	0.228986	2258.18	2833.75	high
hsa-miR-200a-3p_R+1	TAACACTGTCTGGTAACGATGTT	down	0.630711	-0.66495	0.229008	45.1126	28.453	middle
hsa-mir-153-1-p5	GTCATTTTTGTGATCTGCAGCT	down	0.129011	-2.95444	0.231198	2.64595	0.341355	low
PC-3p-26027_228	GTTGAACTCAGTTTTATG	down	0.42742	-1.22628	0.232058	71.6248	30.6139	middle
PC-3p-45039_136	GTAATTTGTAGAAGCTCA	down	0.141699	-2.8191	0.232395	123.246	17.4639	middle
PC-5p-265760_14	TACTAATACAAACTGTGAAA	down	0.131206	-2.9301	0.233141	11.8001	1.54825	middle
hsa-miR-576-5p_R+1	ATTCTAATTTCTCCACGTCTTTG	down	0.697255	-0.520242	0.233995	34.3681	23.9633	middle
PC-3p-161694_29	CCGTGTTACCTAGATTTGT	down	0.196324	-2.34869	0.234751	10.6334	2.08759	middle
hsa-miR-4746-5p_R-1	CCGGTCCCAGGAGAACCTGCAG	down	-inf	-inf	0.235626	1.01123	0	low
hsa-miR-516a-5p_R-1	TTCTCGAGGAAAGAAGCACTTT	up	inf	inf	0.237257	0	1.20181	low
PC-5p-281873_13	CGGGGTGGGCGCTGTGTCT	up	inf	inf	0.241061	0	3.25605	middle
hsa-miR-3688-3p	TATGGAAAGACTTTGCCACTCT	up	3.07214	1.61924	0.24139	0.347065	1.06623	low
PC-5p-10111_489	CAATTTGACATTTTCCTCT	down	0.467005	-1.09849	0.242515	110.63	51.6646	middle
hsa-miR-193a-5p	TGGGTCTTTGCGGGCGAGATGA	up	2.73106	1.44946	0.242854	5.77873	15.782	middle
hsa-miR-9-5p	TCTTTGGTTATCTAGCTGTATGA	up	4.2971	2.10336	0.242962	10.9559	47.0787	middle
PC-3p-292147_13	CGTTCTACTTTTTGACCTG	down	0.0438786	-4.51034	0.243299	7.77953	0.341355	middle
PC-3p-297602_12	ATTTCCTGGGTTGGGCTGAG	up	inf	inf	0.246741	0	2.85132	middle
PC-5p-151869_32	TGGGACTAAGTAATTTGCC	up	7.60212	2.9264	0.246962	0.533946	4.05912	middle
PC-5p-5236_793	TTTTGATTTTCAGTACGAATA	down	0.476154	-1.0705	0.2476	1076.92	512.782	high
PC-3p-344518_10	GTGGGGAAGCAAGAAAGAAT	up	inf	inf	0.248782	0	2.02519	low
PC-5p-233515_17	GCTTGGAGAACAAAGTTCT	down	0.136798	-2.86988	0.249205	6.62435	0.906196	middle
PC-5p-169423_27	ACTGTATCCTGGAATTGGG	down	0.0907534	-3.46191	0.250847	8.14959	0.739603	middle
hsa-miR-548w_R-1	AAAAGTAACTGCGGTTTTTGCC	up	inf	inf	0.252677	0	2.25169	low
hsa-miR-153-3p_R+2	TTGCATAGTCACAAAAGTGATCAT	up	2.57808	1.3663	0.253527	0.879379	2.26711	low
PC-3p-121252_43	CGTGTGGAGCAAAAGGGCA	down	0.160794	-2.63671	0.253787	19.9339	3.20525	middle
PC-5p-90543_62	AGGGCGTGAATACTGTGT	down	0.173103	-2.5303	0.255886	18.0898	3.13139	middle
PC-3p-101998_54	GGGACCACACGGGAAGTGCT	down	0.197467	-2.34032	0.256937	28.7012	5.66755	middle
hsa-miR-15b-3p_R-1	CGAATCATTATTTGCTGCTCT	down	0.774084	-0.369438	0.259049	397.923	308.026	middle
PC-3p-174311_26	CAGTAGCTCGAGGAAAAG	down	0.160793	-2.63672	0.259603	19.8929	3.19864	middle
hsa-miR-1-3p	TGGAATGTAAAGAAGTATGTAT	up	2.31355	1.21011	0.261005	102.393	236.891	middle
PC-3p-42457_144	GTCTTGTAGTCGAAAATTGA	down	0.424464	-1.23628	0.263516	57.8244	24.5444	middle
hsa-miR-3074-5p_R+1	GTTCCTGCTGAACTGAGCCAGT	down	0.127031	-2.97674	0.263736	2.23931	0.284463	low
PC-3p-181769_25	AGGAATTTAAGATGTGAAGC	down	-inf	-inf	0.264236	7.29607	0	middle
PC-5p-95060_59	ATTAATAGGAACAGTCGGG	down	0.195543	-2.35445	0.269373	40.9243	8.00244	middle
hsa-miR-424-3p	CAAAACGTGAGGCGCTGCTAT	up	1.91749	0.939219	0.270294	9.33631	17.9023	middle
PC-5p-147133_33	GGCTCTGTAGTGTAGTTGG	up	2.88362	1.52788	0.272989	2.23367	6.44106	middle
hsa-miR-1284	TCTATACAGACCCTGGCTTTTC	down	0.174014	-2.52273	0.27367	1.63471	0.284463	low
PC-3p-239570_17	TGCCAGTGAGACTGTGGTGGA	up	inf	inf	0.273967	0	1.84565	low
PC-5p-105301_52	CTATAATTTTTGACAAGG	down	0.0180367	-5.79292	0.274039	22.0798	0.398248	middle
PC-3p-204339_21	GCACTGGATTGTAGCCTA	up	inf	inf	0.274602	0	6.72763	middle
PC-5p-120094_44	GACTGAAGGGGGAAGAGCT	down	0.338816	-1.56143	0.275948	13.0716	4.42886	middle
hsa-miR-1273h-5p_R+2	CTGGGAGGTCAAGGCTGCAGTGT	down	0.157868	-2.66321	0.276735	5.43809	0.858502	middle
hsa-miR-144-3p	TACAGTATAGATGATGTACT	down	0.701122	-0.512262	0.278375	8948.59	6274.05	high
hsa-miR-548ax_R-1	AGAAGTAATTGCGGTTTTGCC	down	0.290334	-1.78421	0.279338	3.60817	1.04758	middle
PC-3p-165679_28	AGGAAAGATGAAAAGAACTT	down	-inf	-inf	0.279476	12.4447	0	middle
hsa-miR-4732-5p	TGTAGAGCAGGGAGCAGGAAGCT	up	2.91619	1.54408	0.284608	2.2533	6.57104	middle
hsa-miR-146b-3p	GCCCTGTGGACTCAGTTCTGGT	up	1.86738	0.901018	0.285656	9.89455	18.4769	middle
hsa-miR-4521_R+2	GCTAAGGAAGTCCTGTGCTCAGTT	down	0.411598	-1.28069	0.28941	4.96029	2.04165	middle
PC-5p-440557_7	TTTCTTTTTAACAGTCACTC	up	inf	inf	0.289467	0	4.39956	middle
hsa-miR-20a-5p	TAAAGTGCTTATAGTGCAGGTAG	down	0.853028	-0.229335	0.290214	4629.84	3949.38	high
hsa-miR-454-3p	TAGTGCAATATTGCTTATAGGGT	down	0.729769	-0.454487	0.293223	140.192	102.308	middle
hsa-miR-18a-5p	TAAGGTGCATCTAGTGCAGATAG	down	0.818002	-0.289823	0.295739	231.91	189.703	middle
PC-5p-86512_66	TTATCTATGACGTTATATT	down	0.391036	-1.35463	0.295809	12.6515	4.94717	middle
PC-5p-340622_10	ATAGTGGCAATAACAGGTC	up	inf	inf	0.297428	0	2.02412	low
PC-3p-23495_250	ATAAGCGGAGGAAAAGAAA	down	0.488692	-1.033	0.297669	75.1833	36.7415	middle
hsa-miR-200c-3p	TAATACTGCCGGGTAATGATGGA	down	0.470686	-1.08716	0.298643	91.4845	43.0604	middle
hsa-miR-9985_R-1_1ss16CT	TTCACAGTGGCTAAGTTA	up	2.19062	1.13134	0.299664	2.38137	5.21667	middle
PC-5p-670837_5	GTTGGTTCTGCTGGAAGAGC	down	-inf	-inf	0.301228	4.00011	0	middle
hsa-miR-5010-3p_R+1	TTTTGTGTCTCCCATTCCCCAGT	up	1.78035	0.83216	0.301965	5.02655	8.94902	middle
hsa-miR-490-3p_R+1	CAACCTGGAGGACTCCATGCTGT	up	inf	inf	0.302207	0	3.62229	middle
PC-5p-233220_17	TGTAGAATAAGTGGGAGATG	up	inf	inf	0.303062	0	4.39959	middle
PC-3p-51190_119	ATTCACGTAGCTCTTTAC	down	0.402861	-1.31164	0.307313	37.4738	15.0968	middle
hsa-miR-363-3p	AATTGCACGGTATCCATCTGTA	down	0.864725	-0.209687	0.309191	1536.04	1328.25	high
PC-3p-277541_13	GTGCTTGGGATAGATGATTG	up	inf	inf	0.314304	0	6.25069	middle
hsa-miR-205-5p_R-1	TCCTTCATTCCACCGGAGTCT	down	0.195875	-2.35199	0.315328	97.7053	19.1381	middle
PC-3p-49055_125	GCTGCAGTGGAGCCATCCT	down	0.0372531	-4.74649	0.315472	50.7233	1.8896	middle
PC-3p-181627_25	CAGAAATCTCTTGTTGACCA	down	-inf	-inf	0.317177	30.0324	0	middle
PC-5p-142591_35	AATTTCATCGTGATGGGGA	up	3.57391	1.8375	0.323089	4.33995	15.5106	middle
hsa-miR-100-5p	AACCCGTAGATCCGAACTTGTG	up	1.87347	0.905712	0.32412	135.221	253.332	middle
PC-3p-129030_40	TATGTGCCTAGTGGCTGCTGTCT	up	2.2413	1.16434	0.325259	1.95508	4.38193	low
hsa-miR-4772-3p	CCTGCAACTTTGCCTGATCAGA	down	0.468282	-1.09455	0.326066	13.4386	6.29303	middle
hsa-miR-545-5p	TCAGTAAATGTTTATTAGATGA	up	4.0977	2.03482	0.32676	0.587341	2.40675	low
PC-5p-74742_79	TCAGTGAGACTGTGGGGGA	down	0.218414	-2.19486	0.327092	32.3265	7.06056	middle
PC-5p-99913_55	ATCGAGAAATCTGAAGCTTT	down	0.275982	-1.85736	0.327225	33.6598	9.28948	middle
PC-5p-236086_17	CTGGCGCAGATCTTGGTGG	down	0.273214	-1.8719	0.328504	7.93351	2.16755	middle
hsa-miR-4645-3p_L+2R-1	CGAGACAGTAGTTCTTGCCTGGT	up	3.79735	1.92499	0.3304	0.320368	1.21655	low
hsa-miR-342-3p	TCTCACACAGAAATCGCACCCGT	up	1.26281	0.336638	0.330806	988.626	1248.45	high
hsa-miR-19a-3p	TGTGCAAATCTATGCAAAACTGA	down	0.838826	-0.253557	0.332947	1044.23	875.925	high
hsa-miR-708-5p	AAGGAGCTTACAATCTAGCTGGG	up	3.5038	1.80892	0.333865	0.373762	1.30959	low
PC-3p-51927_118	GGATGTTGGCTTAGAAGCA	down	0.420537	-1.2497	0.334174	66.2043	27.8413	middle
PC-5p-239692_17	AAGTTATGATGAGTAAGAGG	down	-inf	-inf	0.334972	8.66144	0	middle
PC-3p-242158_16	ACATATAGTTTTCTTAATT	down	-inf	-inf	0.334972	8.66144	0	middle
hsa-miR-29b-3p	TAGCACCATTTGAAATCAGTGTT	up	1.20009	0.263148	0.3354	159.207	191.063	middle
hsa-miR-548e-3p	AAAAACTGAGACTACTTTTGCA	up	1.74143	0.800275	0.33567	19.5098	33.975	middle
hsa-miR-106a-5p	AAAAGTGCTTACAGTGCAGGTAG	down	0.799499	-0.322833	0.341823	450.979	360.557	middle
PC-5p-59999_101	ATTCGTCATAAGTTCTTTG	down	-inf	-inf	0.341825	60.8794	0	middle
PC-3p-22635_258	TAGAATATTGAGAGGAGCCT	down	0.513504	-0.961554	0.345015	112.645	57.8437	middle
hsa-miR-103a-2-5p_R+1	AGCTTCTTTACAGTGCTGCCTTGT	up	1.8777	0.908965	0.347106	7.88934	14.8138	middle
PC-5p-104387_52	TATTTTTGTTTCAGTGTGTTTT	down	0.461044	-1.11702	0.349008	18.2115	8.39629	middle
PC-3p-199983_22	TGGGGAAAGGTTCCATGTGA	down	0.0374794	-4.73776	0.349414	12.7255	0.476945	middle
hsa-miR-4732-3p	GCCCTGACCTGTCCTGTTCTG	up	1.52101	0.605027	0.349966	7.13567	10.8534	middle
PC-3p-182041_25	CGCGTAAGCTGAGCTGTGAC	up	inf	inf	0.350116	0	6.47745	middle
hsa-miR-203a-3p_L-1	TGAAATGTTTAGGACCACTAG	down	0.102644	-3.28428	0.352388	236.414	24.2664	middle
PC-3p-58949_103	CTCTGAGGGTTGGGCCTAGG	down	0.488102	-1.03475	0.35451	100.624	49.1146	middle
PC-3p-24850_237	AGACTGAAGTGGAGAATGG	down	0.508524	-0.975613	0.355696	120.298	61.1741	middle
hsa-miR-361-3p	TCCCCCAGGTGTGATTCTGATTT	up	1.22327	0.290747	0.356281	399.078	488.182	middle
PC-5p-198840_22	TGGGGGAAGGGAGCTAGCCTGACT	down	0.291761	-1.77714	0.356353	1.63471	0.476945	low
PC-3p-109388_49	AAAAGGAAGCGGTAAAAGA	down	-inf	-inf	0.3569	19.7143	0	middle
hsa-miR-6511a-3p_R+1	CCTCACCATCCCTTCTGCCTGCA	down	0.239312	-2.06304	0.358981	1.18867	0.284463	low
PC-3p-318605_11	TTTGGGGATTCTAAGAGGAAG	up	4.46839	2.15975	0.359299	0.620216	2.77136	middle
hsa-miR-296-5p	AGGGCCCCCCCTCAATCCTGT	up	2.29911	1.20108	0.360513	2.00521	4.61021	middle
PC-3p-19334_296	ATAGAAGAATGTAGATAAG	down	0.544961	-0.875774	0.362115	59.3104	32.3219	middle
hsa-let-7e-3p	CTATACGGCCTCCTAGCTTTCC	down	0.325622	-1.61873	0.362234	3.39347	1.10499	middle
hsa-miR-106b-5p	TAAAGTGCTGACAGTGCAGAT	down	0.896601	-0.157463	0.36316	1242.5	1114.03	high
hsa-miR-3617-5p	AAAGACATAGTTGCAAGATGGG	up	3.13401	1.64801	0.364409	0.800919	2.51009	low
hsa-miR-155-5p_R-1	TTAATGCTAATCGTGATAGGGGT	up	1.18668	0.246925	0.365372	95.9373	113.846	middle
PC-3p-201589_21	CGCCTGTCTCATTCTCTGCAGT	up	3.97153	1.98969	0.36761	0.533946	2.12058	low
hsa-miR-579-3p	TTCATTTGGTATAAACCGCGATT	up	2.46463	1.30137	0.369498	1.60184	3.94793	low
PC-3p-9170_526	TGATAGGGATAGATTATTG	down	0.529933	-0.916117	0.369951	187.819	99.5314	middle
hsa-miR-92a-1-5p	AGGTTGGGATCGGTTGCAATGCT	up	2.25869	1.17548	0.369987	2.60981	5.89473	middle
PC-3p-24680_239	CCAAATCGTTGCAAACTA	down	0.589253	-0.76304	0.37055	70.0064	41.2515	middle
PC-3p-209073_20	AAGGTGAGATTTTGGGCAAC	down	0.130447	-2.93847	0.371604	6.29012	0.820525	middle
hsa-let-7c-p3	AGTTAACTGTACAACCTTCTAGCT	up	inf	inf	0.373901	0	0.284463	low
hsa-mir-18b-p3_1ss21CT	TACTGCCCTAAATGCCCCTTTT	down	-inf	-inf	0.373901	0.620216	0	low
hsa-miR-33b-5p	GTGCATTGCTGTTGCATTGC	down	-inf	-inf	0.373901	0.427157	0	low
hsa-miR-34c-5p	AGGCAGTGTAGTTAGCTGATTGC	up	inf	inf	0.373901	0	0.572335	low
hsa-miR-103a-1-5p_R+2_1ss1GA	AGCTTCTTTACAGTGCTGCCTTGTT	down	-inf	-inf	0.373901	0.213579	0	low
hsa-mir-107-p5	AGCTTCTTTACAGTGTTGCCTTG	down	-inf	-inf	0.373901	0.587341	0	low
hsa-miR-122-3p_R-1	AACGCCATTATCACACTAAAT	down	-inf	-inf	0.373901	0.868302	0	low
hsa-miR-128-1-5p_L+1R-2	TCGGGGCCGTAGCACTGTCTGA	down	-inf	-inf	0.373901	2.23367	0	middle
hsa-miR-133a-5p	AGCTGGTAAAATGGAACCAAAT	down	-inf	-inf	0.373901	0.40046	0	low
hsa-miR-135b-5p	TATGGCTTTTCATTCCTATGTGA	up	inf	inf	0.373901	0	0.667724	low
hsa-miR-149-5p_R-1	TCTGGCTCCGTGTCTTCACTCC	down	-inf	-inf	0.373901	0.266973	0	low
hsa-miR-152-5p	AGGTTCTGTGATACACTCCGACT	down	-inf	-inf	0.373901	0.587341	0	low
hsa-miR-181b-3p_1ss21AT	CTCACTGAACAATGAATGCAT	down	-inf	-inf	0.373901	0.266973	0	low
hsa-miR-181b-2-3p_R+1	CTCACTGATCAATGAATGCAA	up	inf	inf	0.373901	0	0.284463	low
hsa-miR-182-3p_L+2R-1	GGTGGTTCTAGACTTGCCAACT	up	inf	inf	0.373901	0	0.398248	low
hsa-miR-183-3p_L-1	TGAATTACCGAAGGGCCATAA	up	inf	inf	0.373901	0	0.682711	low
hsa-miR-190b-5p	TGATATGTTTGATATTGGGTTG	down	-inf	-inf	0.373901	0.266973	0	low
hsa-miR-193a-3p	AACTGGCCTACAAAGTCCCAGT	up	inf	inf	0.373901	0	0.572335	low
hsa-miR-195-3p_R+1	CCAATATTGGCTGTGCTGCTCCA	up	inf	inf	0.373901	0	0.284463	low
hsa-miR-197-5p_R+1_1ss23GA	CGGGTAGAGAGGGCAGTGGGAGAT	up	inf	inf	0.373901	0	0.284463	low
hsa-miR-202-5p_R-1	TTCCTATGCATATACTTCTTT	down	-inf	-inf	0.373901	0.620216	0	low
hsa-miR-214-5p	TGCCTGTCTACACTTGCTGTGC	up	inf	inf	0.373901	0	0.683771	low
hsa-miR-218-5p_R+1	TTGTGCTTGATCTAACCATGTA	down	-inf	-inf	0.373901	1.11684	0	low
hsa-miR-219a-5p	TGATTGTCCAAACGCAATTCT	down	-inf	-inf	0.373901	0.310108	0	low
hsa-miR-299-3p	TATGTGGGATGGTAAACCGCTT	up	inf	inf	0.373901	0	1.62161	low
hsa-miR-329-5p	GAGGTTTTCTGGGTTTCTGTTTC	down	-inf	-inf	0.373901	0.347065	0	low
hsa-miR-370-5p_R-1	CAGGTCACGTCTCTGCAGTTA	down	-inf	-inf	0.373901	0.266973	0	low
hsa-miR-374c-5p_R-2	ATAATACAACCTGCTAAGTG	down	-inf	-inf	0.373901	0.133487	0	low
hsa-miR-375-3p	TTTGTTCGTTCGGCTCGCGTGA	up	inf	inf	0.373901	0	0.476945	low
hsa-miR-378d_R-2	ACTGGACTTGGAGTCAGA	down	-inf	-inf	0.373901	0.106789	0	low
hsa-miR-380-5p_L+1R-1	ATGGTTGACCATAGAACATGCG	down	-inf	-inf	0.373901	0.373762	0	low
hsa-miR-432-3p	CTGGATGGCTCCTCCATGTCT	down	-inf	-inf	0.373901	0.266973	0	low
hsa-miR-449a	TGGCAGTGTATTGTTAGCTGGT	up	inf	inf	0.373901	0	0.476945	low
hsa-miR-450a-1-3p	ATTGGGAACATTTTGCATGTAT	down	-inf	-inf	0.373901	0.427157	0	low
hsa-miR-450a-2-3p	ATTGGGGACATTTTGCATTCAT	down	-inf	-inf	0.373901	0.320368	0	low
hsa-miR-455-5p	TATGTGCCTTTGGACTACATCG	up	inf	inf	0.373901	0	0.45514	low
hsa-miR-455-3p_R+1	GCAGTCCATGGGCATATACACT	up	inf	inf	0.373901	0	0.284463	low
hsa-miR-487b-5p_L-1	TGGTTATCCCTGTCCTGTTCG	down	-inf	-inf	0.373901	0.961103	0	low
hsa-miR-495-5p	GAAGTTGCCCATGTTATTTTCG	down	-inf	-inf	0.373901	0.640736	0	low
hsa-miR-502-5p_L+2R-1	TAATCCTTGCTATCTGGGTGCT	up	inf	inf	0.373901	0	0.284463	low
hsa-miR-509-3p_1ss22GT	TGATTGGTACGTCTGTGGGTAT	up	inf	inf	0.373901	0	1.62161	low
hsa-miR-517b-3p	ATCGTGCATCCCTTTAGAGTGT	up	inf	inf	0.373901	0	0.410262	low
hsa-miR-519d-3p_R+1	CAAAGTGCCTCCCTTTAGAGTGT	up	inf	inf	0.373901	0	0.683771	low
hsa-miR-522-3p	AAAATGGTTCCCTTTAGAGTGT	up	inf	inf	0.373901	0	0.820525	low
hsa-miR-526b-5p	CTCTTGAGGGAAGCACTTTCTGT	up	inf	inf	0.373901	0	0.820525	low
hsa-miR-539-5p	GGAGAAATTATCCTTGGTGTGT	down	-inf	-inf	0.373901	1.81542	0	low
hsa-mir-544a-p5	TCTTGTTAAAAAGCAGATTCT	down	-inf	-inf	0.373901	0.266973	0	low
hsa-mir-544b-p5_1ss16TG	AAAATGCAGAATCCAGTTCT	down	-inf	-inf	0.373901	1.60184	0	low
hsa-miR-548ar-3p	TAAAACTGCAGTTATTTTTGC	down	-inf	-inf	0.373901	0.266973	0	low
hsa-miR-548at-5p	AAAAGTTATTGCGGTTTTGGCT	down	-inf	-inf	0.373901	0.373762	0	low
hsa-miR-548ba	AAAGGTAACTGTGATTTTTGCT	down	-inf	-inf	0.373901	0.620216	0	low
hsa-miR-548ay-3p	CAAAACCGCGATTACTCTTGCA	down	-inf	-inf	0.373901	0.480552	0	low
hsa-miR-548n_L-1R+1	AAAAGTAATTGTGGATTTTGTC	down	-inf	-inf	0.373901	0.961103	0	low
hsa-miR-548f-3p_L+1R+2_1	CAAAAACTGTAATTACTTTTGA	down	-inf	-inf	0.373901	0.781786	0	low
hsa-miR-548f-3p_L+1R+2_2	CAAAAACTGTAATTACTTTTGC	down	-inf	-inf	0.373901	0.781786	0	low
hsa-miR-548a-5p	AAAAGTAATTGCGAGTTTTACC	up	inf	inf	0.373901	0	0.284463	low
hsa-mir-548al-p3_1ss7GC	AAAAACCGCAATGACTTTTG	up	inf	inf	0.373901	0	0.151713	low
hsa-miR-548ac_L-1	AAAAACCGGCAATTACTTTTG	up	inf	inf	0.373901	0	0.284463	low
hsa-mir-548ag-2-p3	CAAGAACCTCAATTACCTTTGC	down	-inf	-inf	0.373901	0.427157	0	low
hsa-miR-548e-5p	CAAAAGCAATCGCGGTTTTTGC	down	-inf	-inf	0.373901	0.266973	0	low
hsa-miR-548s_R-1	ATGGCCAAAACTGCAGTTATTT	down	-inf	-inf	0.373901	0.480552	0	low
hsa-miR-551a	GCGACCCACTCTTGGTTTCCA	up	inf	inf	0.373901	0	0.763113	low
hsa-miR-561-5p	ATCAAGGATCTTAAACTTTGCC	up	inf	inf	0.373901	0	0.572335	low
hsa-miR-570-3p_R-1	CGAAAACAGCAATTACCTTTG	up	inf	inf	0.373901	0	1.73966	low
hsa-miR-581_R+1	TCTTGTGTTCTCTAGATCAGTG	up	inf	inf	0.373901	0	0.284463	low
hsa-miR-584-3p_R-1	TCAGTTCCAGGCCAACCAGGC	up	inf	inf	0.373901	0	0.625818	low
hsa-miR-597-3p_R-1	TGGTTCTCTTGTGGCTCAAGCG	up	inf	inf	0.373901	0	0.476945	low
hsa-mir-620-p5	TATATATATATATATATAT	up	inf	inf	0.373901	0	0.284463	low
hsa-miR-624-3p_L+2R-2	AACACAAGGTATTGGTATTAC	down	-inf	-inf	0.373901	0.69413	0	low
hsa-mir-630-p3_1ss5AC	ACCTCGTATTCTGTACCA	up	inf	inf	0.373901	0	2.08759	middle
hsa-mir-643-p5_1ss23GA	TACCTGAGCTAGAATACAAGTAA	up	inf	inf	0.373901	0	0.284463	low
hsa-miR-643_L+1R-1	CACTTGTATGCTAGCTCAGGTA	down	-inf	-inf	0.373901	0.266973	0	low
hsa-miR-653-3p_R-1	TTCACTGGAGTTTGTTTCAAT	down	-inf	-inf	0.373901	0.266973	0	low
hsa-miR-660-3p_R+2	ACCTCCTGTGTGCATGGATTACA	down	-inf	-inf	0.373901	0.480552	0	low
hsa-miR-675-3p_R+2	CTGTATGCCCTCACCGCTCAGC	down	-inf	-inf	0.373901	0.427157	0	low
hsa-miR-758-5p_L-1R+1	ATGGTTGACCAGAGAGCACACG	down	-inf	-inf	0.373901	1.0145	0	low
hsa-miR-760_R+2	CGGCTCTGGGTCTGTGGGGAGT	down	-inf	-inf	0.373901	1.81542	0	low
hsa-miR-769-3p_L-1	TGGGATCTCCGGGGTCTTGGTT	down	-inf	-inf	0.373901	0.907709	0	low
hsa-miR-877-3p_1ss21GT	TCCTCTTCTCCCTCCTCCCAT	down	-inf	-inf	0.373901	0.266973	0	low
hsa-miR-940_R+3	AAGGCAGGGCCCCCGCTCCCCGGA	down	-inf	-inf	0.373901	0.533946	0	low
hsa-miR-1224-5p_R+2	GTGAGGACTCGGGAGGTGGAG	up	inf	inf	0.373901	0	0.284463	low
hsa-miR-1229-3p	CTCTCACCACTGCCCTCCCACAG	down	-inf	-inf	0.373901	0.854314	0	low
hsa-miR-1250-5p	ACGGTGCTGGATGTGGCCTTT	down	-inf	-inf	0.373901	0.747525	0	low
hsa-mir-1255a-p3	CTATCTTCTTTGCTCATCCTTG	down	-inf	-inf	0.373901	0.266973	0	low
hsa-miR-1278	TAGTACTGTGCATATCATCTAT	up	inf	inf	0.373901	0	0.284463	low
hsa-miR-1294	TGTGAGGTTGGCATTGTTGTCT	down	-inf	-inf	0.373901	0.427157	0	low
hsa-miR-1299	TTCTGGAATTCTGTGTGAGGGA	down	-inf	-inf	0.373901	1.12129	0	low
hsa-mir-1302-1-p5_1ss9AG	GAATTTCAGGTAAACAATGAAT	down	-inf	-inf	0.373901	0.800919	0	low
hsa-miR-1537-3p	AAAACCGTCTAGTTACAGTTGT	down	-inf	-inf	0.373901	0.320368	0	low
hsa-miR-1908-3p_R+1	CCGGCCGCCGGCTCCGCCCCGT	down	-inf	-inf	0.373901	0.640736	0	low
hsa-miR-2277-3p_R+1	TGACAGCGCCCTGCCTGGCTCG	down	-inf	-inf	0.373901	0.266973	0	low
hsa-miR-3065-3p	TCAGCACCAGGATATTGTTGGAG	up	inf	inf	0.373901	0	1.54825	low
hsa-miR-3130-3p	GCTGCACCGGAGACTGGGTAA	down	-inf	-inf	0.373901	0.186881	0	low
hsa-miR-3138_L-5R+2	ACAGTGAGGTAGAGGGAGTGC	down	-inf	-inf	0.373901	0.69413	0	low
hsa-miR-3161_R-1	CTGATAAGAACAGAGGCCCAGA	up	inf	inf	0.373901	0	0.398248	low
hsa-miR-3188_1ss23GT	AGAGGCTTTGTGCGGATACGGGT	down	-inf	-inf	0.373901	0.266973	0	low
hsa-miR-3605-5p_L+2R-1	GATGAGGATGGATAGCAAGGAAGC	down	-inf	-inf	0.373901	0.266973	0	low
hsa-miR-3611_R-1	TTGTGAAGAAAGAAATTCTT	down	-inf	-inf	0.373901	1.12129	0	low
hsa-mir-3617-p3_1ss18CT	TATGTCTCATCAGCACCTTAT	down	-inf	-inf	0.373901	3.46616	0	middle
hsa-miR-3920	ACTGATTATCTTAACTCTCTGA	down	-inf	-inf	0.373901	0.640736	0	low
hsa-miR-3928-3p	GGAGGAACCTTGGAGCTTCGGC	down	-inf	-inf	0.373901	2.24257	0	middle
hsa-miR-3934-5p_R+1	TCAGGTGTGGAAACTGAGGCAGG	up	inf	inf	0.373901	0	1.73966	low
hsa-miR-3940-3p_R+1	CAGCCCGGATCCCAGCCCACTTT	down	-inf	-inf	0.373901	0.427157	0	low
hsa-miR-3942-5p_L-1	AGCAATACTGTTACCTGAAAT	down	-inf	-inf	0.373901	0.480552	0	low
hsa-miR-3942-3p_L+2R-1	TATTTCAGATAACAGTATTACA	down	-inf	-inf	0.373901	0.266973	0	low
hsa-mir-3976-p5_1ss9GC	GATATAGACAGCAGGAAG	up	inf	inf	0.373901	0	1.36754	low
hsa-mir-3976-p3_1ss16AT	AACCTTTACTGCAGCTTGAC	down	-inf	-inf	0.373901	3.46616	0	middle
hsa-miR-4422_R+1	AAAAGCATCAGGAAGTACCCAC	down	-inf	-inf	0.373901	0.266973	0	low
hsa-miR-4433a-3p	ACAGGAGTGGGGGTGGGACAT	up	inf	inf	0.373901	0	0.572335	low
hsa-miR-4449_L-1R+2	GTCCCGGGGCTGCGCGAGGCACA	down	-inf	-inf	0.373901	0.266973	0	low
hsa-miR-4511_L-1R+2	AAGAACTGTTGCATTTGCCCTGA	down	-inf	-inf	0.373901	0.320368	0	low
hsa-miR-4513_L-1R-3_1ss13GT	GACTGACGGCTTGAGGCC	up	inf	inf	0.373901	0	1.7778	low
hsa-miR-4533_R+2	TGGAAGGAGGTTGCCGGACGCTGT	down	-inf	-inf	0.373901	0.620216	0	low
hsa-miR-4662b	AAAGATGGACAATTGGCTAAAT	down	-inf	-inf	0.373901	0.266973	0	low
hsa-miR-4676-5p	GAGCCAGTGGTGAGACAGTGA	down	-inf	-inf	0.373901	0.320368	0	low
hsa-miR-4676-3p_L-1R+1	ACTGTTTCACCACTGGCTCTTT	down	-inf	-inf	0.373901	0.744259	0	low
hsa-miR-4685-3p_1ss22GT	TCTCCCTTCCTGCCCTGGCTAT	down	-inf	-inf	0.373901	0.427157	0	low
hsa-miR-4701-5p	TTGGCCACCACACCTACCCCTT	down	-inf	-inf	0.373901	0.266973	0	low
hsa-miR-4717-3p	ACACATGGGTGGCTGTGGCCT	down	-inf	-inf	0.373901	0.266973	0	low
hsa-miR-4766-3p_R+2	ATAGCAATTGCTCTTTTGGAAGA	up	inf	inf	0.373901	0	0.476945	low
hsa-miR-4772-5p	TGATCAGGCAAAATTGCAGACT	up	inf	inf	0.373901	0	0.572335	low
hsa-miR-5006-3p_R+1	TTTCCCTTTCCATCCTGGCAGA	down	-inf	-inf	0.373901	0.373762	0	low
hsa-miR-5187-5p	TGGGATGAGGGATTGAAGTGGA	down	-inf	-inf	0.373901	0.320368	0	low
hsa-miR-5189-5p_L-2	TGGGCACAGGCGGATGGACAGG	down	-inf	-inf	0.373901	0.266973	0	low
hsa-miR-5189-3p_R+2	TGCCAACCGTCAGAGCCCAGACC	down	-inf	-inf	0.373901	0.320368	0	low
hsa-miR-5588-5p	ACTGGCATTAGTGGGACTTTT	down	-inf	-inf	0.373901	0.266973	0	low
hsa-miR-5683	TACAGATGCAGATTCTCTGACTTC	up	inf	inf	0.373901	0	0.763113	low
hsa-miR-5690_R+1	TCAGCTACTACCTCTATTAGGA	down	-inf	-inf	0.373901	0.266973	0	low
hsa-miR-6511b-3p_R-1	CCTCACCACCCCTTCTGCCTGC	down	-inf	-inf	0.373901	0.266973	0	low
hsa-miR-6516-3p	ATCATGTATGATACTGCAAACA	down	-inf	-inf	0.373901	0.587341	0	low
hsa-miR-6734-5p_L+1R-1	CTTGAGGGGAGAATGAGGTGGAG	up	inf	inf	0.373901	0	0.683771	low
hsa-miR-6735-5p_L+1R-3_1ss23CT	CCAGGGCAGAGGGCACAGGAATT	up	inf	inf	0.373901	0	0.341355	low
hsa-mir-6740-p5_1ss15CT	GTCTCTGGGAGTTGTTTA	up	inf	inf	0.373901	0	0.683771	low
hsa-miR-6741-5p_L+1R-1_1ss21GA	GGTGGGTGCTGGTGGGAGCCAT	up	inf	inf	0.373901	0	0.284463	low
hsa-miR-6741-3p	TCGGCTCTCTCCCTCACCCTAG	down	-inf	-inf	0.373901	1.06789	0	low
hsa-miR-6803-3p	TCCCTCGCCTTCTCACCCTCAG	up	inf	inf	0.373901	0	0.341355	low
hsa-miR-6809-5p_L+1R+1	TTGGCAAGGAAAGAAGAGGATCAA	down	-inf	-inf	0.373901	0.744259	0	low
hsa-miR-6818-5p	TTGTGTGAGTACAGAGAGCATC	up	inf	inf	0.373901	0	0.476945	low
hsa-miR-6842-5p	TGGGGGTGGTCTCTAGCCAAGG	down	-inf	-inf	0.373901	0.480552	0	low
hsa-miR-6894-5p_L+2	GAAGGAGGATGGAGAGCTGGGCCAGA	up	inf	inf	0.373901	0	0.284463	low
hsa-miR-7110-3p_L+1_1ss23GT	CTCTCTCTCCCACTTCCCTGCAT	down	-inf	-inf	0.373901	0.266973	0	low
hsa-miR-7843-5p_L+1	TGAGGGCAGAGCCAGCTTCCTGA	down	-inf	-inf	0.373901	0.620216	0	low
hsa-miR-7848-3p	CTACCCTCGGTCTGCTTACCACA	down	-inf	-inf	0.373901	0.266973	0	low
hsa-miR-7851-3p_R+1	TACCTGGGAGACTGAGGTTGGAT	down	-inf	-inf	0.373901	0.69413	0	low
PC-3p-459989_7	GGTAAGCGGGAGGTCTCGA	up	inf	inf	0.373901	0	1.21776	low
PC-3p-443442_7	ACATCTGAATATGCAAAAAA	up	inf	inf	0.373901	0	0.957279	low
PC-3p-563561_6	TCTGGGTGCTGATGTCCTT	down	-inf	-inf	0.373901	4.1594	0	middle
PC-3p-587085_5	GGGGCTCTGTGGTGAACCG	down	-inf	-inf	0.373901	2.23367	0	middle
PC-5p-397595_8	GAATTGTAGTTTTTGGGTA	down	-inf	-inf	0.373901	3.47165	0	middle
PC-5p-392681_8	TTGATATTCCCAAACCTG	up	inf	inf	0.373901	0	4.52312	middle
PC-5p-171835_27	TGGCTGAGGTAGGAATCCT	down	-inf	-inf	0.373901	46.4466	0	middle
PC-3p-333412_11	AGGGCATCATGGAGGGTGAGA	down	-inf	-inf	0.373901	8.9347	0	middle
PC-5p-636132_5	GGCAGCTGTAGTATAGTGG	down	-inf	-inf	0.373901	3.46616	0	middle
PC-5p-710595_5	ATTTTAAGTAGTTTAACTAT	up	inf	inf	0.373901	0	1.73966	low
PC-5p-237306_17	ATACTTGTCTGAGTGTCAG	up	inf	inf	0.373901	0	2.32482	middle
PC-3p-544626_6	AAAAATTCTTCATCTCTGAG	up	inf	inf	0.373901	0	0.820525	low
PC-5p-148604_33	GAAATTCTAAGATTTGCTGA	down	-inf	-inf	0.373901	46.8672	0	middle
PC-3p-314129_11	GTAAGCGATCATAGAAACT	down	-inf	-inf	0.373901	7.62556	0	middle
PC-5p-614283_5	GTGACTGCAAGGCTGGAGTG	down	-inf	-inf	0.373901	2.23367	0	middle
PC-5p-374757_9	ATCTTTTCTTCTTAACGATC	down	-inf	-inf	0.373901	11.0917	0	middle
PC-5p-689211_5	TTGGACTTCTGGCAGGAGC	up	inf	inf	0.373901	0	0.683771	low
PC-5p-727897_5	CCATCCTCCAAGGCTAAA	down	-inf	-inf	0.373901	2.23367	0	middle
PC-5p-710396_5	ACGAAATGACTTTATCCGA	up	inf	inf	0.373901	0	0.683771	low
PC-5p-497763_6	CGGTTGAGTTACATTCTCT	up	inf	inf	0.373901	0	1.8579	low
PC-5p-470368_6	GGAATTGTGAAGTTTGAGG	up	inf	inf	0.373901	0	2.08759	middle
PC-3p-737593_5	GCCCTGGTTCTAGCTTGAA	up	inf	inf	0.373901	0	1.54825	low
PC-5p-741350_5	CTGGTAACATCTTTTTCTG	down	-inf	-inf	0.373901	3.46616	0	middle
PC-5p-700814_5	CTGGGTGTGGAAGCGCAGT	down	-inf	-inf	0.373901	3.46616	0	middle
PC-3p-431978_7	CCGAAGATGTGATATTTGT	up	inf	inf	0.373901	0	0.957279	low
PC-5p-566159_6	ATATTCTATTATTTGTAGCAG	up	inf	inf	0.373901	0	2.08759	middle
PC-5p-536833_6	GGGTAACTGAGAGCAAGGG	up	inf	inf	0.373901	0	1.8579	low
PC-5p-412512_7	GATGGAGGGTAGGCGGCT	up	inf	inf	0.373901	0	0.957279	low
PC-3p-733339_5	GTAGGTCATTGCTGGGTTC	down	-inf	-inf	0.373901	0.620216	0	low
PC-5p-346003_10	TACTTCTGACATGGACACT	down	-inf	-inf	0.373901	6.70102	0	middle
PC-5p-268961_14	CATCTGGTAAAGATAATGA	up	inf	inf	0.373901	0	9.39417	middle
PC-5p-617393_5	CTGCGGCTTCGGCTGCGGCA	down	-inf	-inf	0.373901	0.620216	0	low
PC-5p-601102_5	AGTAGGTGGCTGCCAGATT	down	-inf	-inf	0.373901	1.73308	0	low
PC-3p-194885_22	GATGATATGAAAGGGGATTA	up	inf	inf	0.373901	0	14.6132	middle
PC-5p-447092_7	GTAGCATGGGGCACGTGAA	up	inf	inf	0.373901	0	4.52312	middle
PC-3p-706220_5	TGGACAACAGGTCAAGATTCC	up	inf	inf	0.373901	0	1.73966	low
PC-5p-781668_5	GATTAGTTCAGTGGTAGAATA	up	inf	inf	0.373901	0	1.54825	low
PC-3p-696084_5	TGATGTTTTGCTTATTTGA	down	-inf	-inf	0.373901	1.11684	0	low
PC-3p-710461_5	GTTTCTAGCCTCTCTGCCAAGTT	up	inf	inf	0.373901	0	0.683771	low
PC-3p-603126_5	ATATCTGATGAGTTTCTGATT	up	inf	inf	0.373901	0	1.73966	low
PC-3p-357163_10	TCGGTCGTGAGGCTTGACCT	up	inf	inf	0.373901	0	2.05131	middle
PC-5p-542695_6	ACTGCAGCGTTTTTGGCTT	up	inf	inf	0.373901	0	2.08759	middle
PC-5p-599757_5	CAGGATAGCAGAAACTTTTATA	up	inf	inf	0.373901	0	1.73966	low
PC-3p-586328_5	TAGAGTATAGTAGGGGTAA	down	-inf	-inf	0.373901	3.46616	0	middle
PC-3p-641187_5	CTGTGGCTGCACTGGTCAA	up	inf	inf	0.373901	0	1.54825	low
PC-5p-679891_5	CTAGCTGTAAACAATGGAT	up	inf	inf	0.373901	0	1.73966	low
PC-3p-578954_5	GACAGACGGGGGCATTCGT	up	inf	inf	0.373901	0	0.683771	low
PC-5p-749807_5	TGGTGAACTATCTGGACTG	down	-inf	-inf	0.373901	2.23367	0	middle
PC-3p-7231_627	TTGATTGGATGATTTGTT	up	inf	inf	0.373901	0	86.5654	middle
PC-5p-142836_34	ACTCAAAGAGTTTTGACC	down	-inf	-inf	0.373901	25.4639	0	middle
PC-5p-531458_6	TAATATTGGTATTACTGTTT	up	inf	inf	0.373901	0	2.08759	middle
PC-5p-436980_7	AAGCTGTATGAGGGGTTTCT	down	-inf	-inf	0.373901	3.03769	0	middle
PC-3p-444379_7	TCCACTGGAAGGAATAAGA	up	inf	inf	0.373901	0	2.43553	middle
PC-5p-388484_8	GATTTTGATTTTCAGTAACA	down	-inf	-inf	0.373901	3.47165	0	middle
PC-5p-203760_21	CTGAATTTAAGCATATTATT	up	inf	inf	0.373901	0	13.3149	middle
PC-3p-517687_6	AGTCCTGTTCCTGCTACCA	up	inf	inf	0.373901	0	2.08759	middle
PC-5p-419759_7	GATTAGCATGGAATAATGG	up	inf	inf	0.373901	0	2.16755	middle
PC-5p-422897_7	ATCCTCATCTCCGGCTCTGCT	up	inf	inf	0.373901	0	0.957279	low
PC-3p-740101_5	ATGGCAGTGGAAGCGTTCA	down	-inf	-inf	0.373901	3.46616	0	middle
PC-3p-777578_5	TGCGAGTTGGTGGGTGGAA	down	-inf	-inf	0.373901	2.23367	0	middle
PC-5p-728814_5	TTGTTGAAAGGAAAGTGAAA	up	inf	inf	0.373901	0	1.73966	low
PC-5p-293247_12	ATCCAGGACTTTTACTTTG	down	-inf	-inf	0.373901	8.31879	0	middle
PC-3p-156622_30	TGGGGACTGACGGCTTGAG	up	inf	inf	0.373901	0	4.10262	middle
PC-3p-748366_5	TCAGGAGTTGCTGGTACTGC	up	inf	inf	0.373901	0	0.683771	low
PC-3p-707497_5	TGTCTTGTCATATTTCCCTG	up	inf	inf	0.373901	0	1.73966	low
PC-5p-526999_6	CAATTTTACTGATGAAACTGC	up	inf	inf	0.373901	0	2.08759	middle
PC-5p-551654_6	ACCCTAGGTTGTTGTTCTT	up	inf	inf	0.373901	0	3.82726	middle
PC-3p-290060_13	AAAACTGTAGAAAGGCCTG	up	inf	inf	0.373901	0	0.739603	low
PC-3p-145704_34	TCTGCATGGAATAATAGAAT	up	inf	inf	0.373901	0	10.2566	middle
PC-5p-402624_8	TTTTTTGAGTGTAAGTAGG	down	-inf	-inf	0.373901	3.47165	0	middle
PC-3p-624513_5	ATAGTGGACGAGAAATAAC	down	-inf	-inf	0.373901	4.46735	0	middle
PC-5p-459499_7	TCTGGTGTTGAGCGTCTGTG	up	inf	inf	0.373901	0	2.43553	middle
PC-5p-476723_6	CGCGATTGCTGGTTGAAAA	up	inf	inf	0.373901	0	2.08759	middle
PC-5p-362267_9	CGTTTCTGTATCTTTTTCT	down	-inf	-inf	0.373901	4.02061	0	middle
PC-3p-236690_17	AGAAGGGTGGTAAACTCC	up	inf	inf	0.373901	0	9.59913	middle
PC-5p-680048_5	GGTAGGACTTTTAGGAGTA	down	-inf	-inf	0.373901	2.23367	0	middle
PC-5p-526344_6	AGTTAGAGAGCTTTTAGGA	down	-inf	-inf	0.373901	0.744259	0	low
PC-5p-551092_6	ATTTATATAAAAAACTGGAAATA	down	-inf	-inf	0.373901	2.68041	0	middle
PC-3p-138008_36	ACACCCCCTGGAAGCCTCT	up	inf	inf	0.373901	0	15.1728	middle
PC-5p-432286_7	AGAATGGCAGTAGTGCATG	up	inf	inf	0.373901	0	2.16755	middle
PC-5p-578350_5	AAGCTGTTCCTTGACTTCC	down	-inf	-inf	0.373901	0.620216	0	low
PC-3p-613956_5	AATTGCCAGTAGAATCAGA	up	inf	inf	0.373901	0	1.73966	low
PC-5p-781751_5	TGCCAGTTAGACTGTGGGG	up	inf	inf	0.373901	0	1.73966	low
PC-5p-474238_6	TTGGTTTGGTTGTTTAATG	up	inf	inf	0.373901	0	2.08759	middle
PC-5p-606008_5	AGTCTTGCTTCTGATACCA	up	inf	inf	0.373901	0	1.73966	low
PC-3p-727859_5	AAAAGGAAGAGGCAACCCG	down	-inf	-inf	0.373901	3.46616	0	middle
PC-3p-734466_5	TGTTGTCCTGTAAATTAGT	up	inf	inf	0.373901	0	1.73966	low
PC-3p-181263_25	CCAGAGAGGCCCTGGAGGA	up	inf	inf	0.373901	0	14.5535	middle
PC-5p-754246_5	TGTTGACCAGGGTATTCTTGA	down	-inf	-inf	0.373901	2.23367	0	middle
PC-5p-730844_5	GCTCAAATTTGAAATCTCA	down	-inf	-inf	0.373901	0.620216	0	low
PC-3p-470252_6	TGAAATCTGGCTCCTTTTG	up	inf	inf	0.373901	0	2.08759	middle
PC-3p-696781_5	CTAAGGATTTTAGGTAACC	down	-inf	-inf	0.373901	3.46616	0	middle
PC-3p-507105_6	TCAAAGTTTTTGGGTTCTG	up	inf	inf	0.373901	0	1.8579	low
PC-3p-673381_5	TTGTTTTTCTCTGTGAGTCG	down	-inf	-inf	0.373901	2.16978	0	middle
PC-3p-413530_7	GTGCAGACTTAAGTGGGTG	up	inf	inf	0.373901	0	3.71579	middle
PC-5p-734166_5	TGGGGGTAGAGCACTGGAT	up	inf	inf	0.373901	0	1.54825	low
PC-3p-128411_40	GCATTTCTGGGCCAAGTCC	down	-inf	-inf	0.373901	36.0481	0	middle
PC-5p-692399_5	CTGGAGAAGAGGAACGATG	up	inf	inf	0.373901	0	1.54825	low
PC-5p-464939_7	CTGTGGAGTGTAGGATACT	down	-inf	-inf	0.373901	3.12714	0	middle
PC-3p-517050_6	AGCAAAAGCCCTAGAAAGAGT	up	inf	inf	0.373901	0	2.08759	middle
PC-5p-531325_6	GTGAAACGGGAGAAGCTCA	down	-inf	-inf	0.373901	4.1594	0	middle
PC-5p-152035_32	GAACCTGTAGTTTTCTTAA	down	-inf	-inf	0.373901	14.2955	0	middle
PC-5p-429948_7	TCGCTGGGTATTTCAGCCT	down	-inf	-inf	0.373901	0.868302	0	low
PC-5p-588687_5	ACCCTCAGTCCGTATTGGTCTCT	down	-inf	-inf	0.373901	0.620216	0	low
PC-3p-675117_5	CTTGTAGCCCTTAGTTTTT	down	-inf	-inf	0.373901	2.23367	0	middle
PC-5p-561867_6	TGAAAGGAGGAGAAATTAAGG	down	-inf	-inf	0.373901	2.68041	0	middle
PC-5p-40806_150	CTCTAAGTTCTCTTGACCG	up	inf	inf	0.373901	0	21.8807	middle
PC-5p-543461_6	ATGTTGAATTAAGGAATAACT	up	inf	inf	0.373901	0	1.8579	low
PC-3p-134972_37	AAATGGGGACTGACGGCTTG	up	inf	inf	0.373901	0	19.9661	middle
PC-3p-722781_5	AGGAACGGCCACATCAGCA	down	-inf	-inf	0.373901	0.620216	0	low
PC-5p-350518_10	AGCTGGGCGGTGGAGGAAA	down	-inf	-inf	0.373901	8.67911	0	middle
PC-5p-408831_8	TCTTTTTGTATTCACTGGT	down	-inf	-inf	0.373901	0.992346	0	low
PC-3p-740676_5	AGTCCCTTCAGCGGCACCA	down	-inf	-inf	0.373901	1.73308	0	low
PC-5p-754006_5	ACATTGGCAGTGCTGTGAAG	down	-inf	-inf	0.373901	2.23367	0	middle
PC-5p-255738_15	TATGTGTATGTGTATGTGTGTAA	down	-inf	-inf	0.373901	0.800919	0	low
PC-3p-684275_5	TGGGTTGTAAAAGGATCTT	down	-inf	-inf	0.373901	3.46616	0	middle
PC-3p-336582_10	TGACCATTTGATTTTGATTTT	up	inf	inf	0.373901	0	3.47932	middle
PC-5p-683952_5	TGTGGGTTTGCCTGTCTCG	up	inf	inf	0.373901	0	0.683771	low
PC-3p-250998_16	CTGAAGCACTGTGTCATTG	up	inf	inf	0.373901	0	2.18807	middle
PC-5p-313018_11	ATACTGGGTGCTGCAGTAC	up	inf	inf	0.373901	0	1.04928	low
PC-3p-772625_5	TTGTAGATTTCATAATATTA	down	-inf	-inf	0.373901	3.46616	0	middle
PC-5p-603871_5	GAAAAGACCCTGAAACCAT	down	-inf	-inf	0.373901	0.620216	0	low
PC-3p-738309_5	TTTCCCTGAGCGGACCCCA	up	inf	inf	0.373901	0	1.73966	low
PC-3p-308784_12	AGGCACTTTACTTTGAAAA	down	-inf	-inf	0.373901	5.36082	0	middle
PC-3p-232896_17	GAGTAGTACAGCTTGGGAT	up	inf	inf	0.373901	0	5.91485	middle
PC-3p-525210_6	GTTCTGTGGGCTGTAAGTG	up	inf	inf	0.373901	0	1.8579	low
PC-3p-588010_5	GTAAATAGAATGCACTTTGG	up	inf	inf	0.373901	0	0.683771	low
PC-5p-283327_13	TCTGGATATGCAAAGGTGA	up	inf	inf	0.373901	0	4.52312	middle
PC-3p-466477_7	TAAGTAAAATAGAGTGTTTA	up	inf	inf	0.373901	0	2.43553	middle
PC-5p-624994_5	ATTGGCTCTGAGGGCAAAAGC	up	inf	inf	0.373901	0	0.683771	low
PC-5p-743210_5	AACTTCACAGGTGTTATAG	down	-inf	-inf	0.373901	2.23367	0	middle
PC-5p-765704_5	ATTTAAAAGAAGGCAGGGGTG	up	inf	inf	0.373901	0	1.73966	low
PC-5p-714192_5	AACTGGTACTGACAAGGGGA	down	-inf	-inf	0.373901	3.46616	0	middle
PC-3p-508705_6	TATATATATTTTTCCCCCTTTT	down	-inf	-inf	0.373901	0.744259	0	low
PC-5p-383484_8	AGTGAATGCCCCATGACCCA	up	inf	inf	0.373901	0	2.4772	middle
PC-3p-222392_19	TTAGAGAAGTAGTATTTATTT	up	inf	inf	0.373901	0	8.35038	middle
PC-5p-696084_5	TGATGTTTTGCTTATTTGA	down	-inf	-inf	0.373901	1.11684	0	low
PC-5p-649044_5	CTTGAGCATCACTTTGTCAG	up	inf	inf	0.373901	0	1.73966	low
PC-3p-431864_7	AGTTCATCTAGACAGCAGG	down	-inf	-inf	0.373901	5.36082	0	middle
PC-5p-496540_6	CACAGTCCGCCGGCCTCA	down	-inf	-inf	0.373901	2.68041	0	middle
PC-3p-662325_5	AGAGGAAAAGAAAATAACAA	down	-inf	-inf	0.373901	3.46616	0	middle
PC-3p-559569_6	GGAAGATTTTGTGTAGGATAGG	down	-inf	-inf	0.373901	0.744259	0	low
PC-3p-782060_5	TGCTTTGGTTTTTCTTTCTTAT	down	-inf	-inf	0.373901	3.46616	0	middle
PC-3p-367173_9	AAGACAGATTCTGCAATTT	down	-inf	-inf	0.373901	6.70102	0	middle
PC-5p-551139_6	AATTCCTGGGCCCGTCAGAA	up	inf	inf	0.373901	0	2.08759	middle
PC-5p-517626_6	TTGGAAAGGGTGCATTTATT	up	inf	inf	0.373901	0	2.08759	middle
PC-5p-121024_43	GGAAACAGGTAGAGCTACT	up	inf	inf	0.373901	0	5.88043	middle
PC-5p-268106_14	TTATTTGTAGCAGTGATCC	up	inf	inf	0.373901	0	7.30658	middle
PC-5p-487579_6	GGTGGAGGCTCGAATTTGG	up	inf	inf	0.373901	0	0.820525	low
PC-3p-626557_5	CATTTGGGAATCCTGGCTG	down	-inf	-inf	0.373901	3.46616	0	middle
PC-5p-685156_5	GGTGCAGAGGGACGGAGAA	down	-inf	-inf	0.373901	2.23367	0	middle
PC-5p-706489_5	TGGCTAATCCTTATTGAAT	down	-inf	-inf	0.373901	2.23367	0	middle
PC-3p-159651_30	TACTTGTAAGCTGGTGTGA	up	inf	inf	0.373901	0	10.438	middle
PC-5p-61141_99	GTGCGAAGCTACCATCTG	up	inf	inf	0.373901	0	17.0943	middle
PC-5p-475064_6	TTGGTCTTCTCTGCCCTCCAGT	down	-inf	-inf	0.373901	0.854314	0	low
PC-3p-637158_5	TTACTGAAACTGTAGATTTT	down	-inf	-inf	0.373901	2.16978	0	middle
PC-3p-587435_5	AAGAGCCCAGCACTTCTGCT	down	-inf	-inf	0.373901	3.46616	0	middle
PC-3p-646739_5	CCTCACTGTCTCCTTCCGA	up	inf	inf	0.373901	0	1.54825	low
PC-5p-740676_5	AGTCCCTTCAGCGGCACCA	down	-inf	-inf	0.373901	1.73308	0	low
PC-3p-609596_5	AAAGCATTGCGAGGGCCTG	up	inf	inf	0.373901	0	0.683771	low
PC-3p-384692_8	TGACTGAAGTCTATTTATT	down	-inf	-inf	0.373901	3.47165	0	middle
PC-3p-345903_10	GCCTCTAAATCGGAATCCCA	up	inf	inf	0.373901	0	5.26404	middle
PC-3p-452000_7	AATGAAAGTGAAGTCGGCTTG	up	inf	inf	0.373901	0	2.73508	middle
PC-5p-705442_5	GAGTGTATACTAAAGCTGT	down	-inf	-inf	0.373901	3.46616	0	middle
PC-5p-437897_7	CATCTGTAGGATTATGGCT	up	inf	inf	0.373901	0	2.16755	middle
PC-5p-627777_5	TTTGCCTGGCTTGAAAGAG	up	inf	inf	0.373901	0	0.683771	low
PC-3p-380700_8	ATTGGCAGCCACAGAAACC	down	-inf	-inf	0.373901	3.47165	0	middle
PC-5p-722750_5	AAACTAACAAGTATTCCCT	up	inf	inf	0.373901	0	0.683771	low
PC-3p-779436_5	AAAGCCAGGGTAGCAAACG	down	-inf	-inf	0.373901	2.16978	0	middle
PC-5p-382319_8	AAGTGATGGACCCGGGTTC	down	-inf	-inf	0.373901	3.57388	0	middle
PC-3p-417390_7	TTGTATCTCCCAGTGCTTGT	up	inf	inf	0.373901	0	0.667724	low
PC-3p-610830_5	AATGAAGTTCTGTCATCTA	down	-inf	-inf	0.373901	2.23367	0	middle
PC-3p-357989_9	TTAGATTTCCTTGAATAAATT	up	inf	inf	0.373901	0	2.73508	middle
PC-5p-685147_5	TTATCTAAACCTTTAATTA	down	-inf	-inf	0.373901	3.46616	0	middle
PC-3p-231425_18	TTAGTGGGGGTGCTACTC	down	-inf	-inf	0.373901	4.09343	0	middle
PC-3p-456245_7	GATACCGAGGAGAACCCCC	up	inf	inf	0.373901	0	2.43553	middle
PC-5p-625764_5	CTCCCACTGAAGTCACCA	up	inf	inf	0.373901	0	1.73966	low
PC-5p-382436_8	CTACGATGGAATGAGACTT	down	-inf	-inf	0.373901	5.54586	0	middle
PC-5p-591371_5	CACCTCAGGCAGGAAACTGA	up	inf	inf	0.373901	0	1.73966	low
PC-5p-681575_5	GAAGCTATAGAAAGAATCT	down	-inf	-inf	0.373901	2.16978	0	middle
PC-3p-115463_46	TGCAAAGGTGACTTAATTGAA	up	inf	inf	0.373901	0	34.0974	middle
PC-5p-258290_15	AAAATGGGGACTGACGGCT	up	inf	inf	0.373901	0	2.05131	middle
PC-3p-663527_5	TGGACTGCAGTGCTGAGCC	up	inf	inf	0.373901	0	1.73966	low
PC-5p-773347_5	TGTGAAGAGACATGAAAG	up	inf	inf	0.373901	0	1.54825	low
PC-5p-702461_5	GCATTGTGATGGTCGTGAA	up	inf	inf	0.373901	0	1.73966	low
PC-5p-525112_6	TTGAAATAGAACTTTGAAAAGAG	up	inf	inf	0.373901	0	2.08759	middle
PC-5p-681525_5	ACTGAAACATCTAAGTAACC	down	-inf	-inf	0.373901	3.46616	0	middle
PC-5p-760231_5	CTGAGTGGAAGAGTTGGAT	up	inf	inf	0.373901	0	1.73966	low
PC-5p-576877_5	GCATCACTTAGTAATTAAAG	down	-inf	-inf	0.373901	2.23367	0	middle
PC-3p-206974_21	GTTGTGATGCTGTTTCCCT	down	-inf	-inf	0.373901	14.2113	0	middle
PC-5p-584774_5	ATATATATTATGTGTGTAGGT	up	inf	inf	0.373901	0	1.73966	low
PC-5p-370904_9	CCTGGGAACTGCAGTGGAT	down	-inf	-inf	0.373901	4.02061	0	middle
PC-3p-487493_6	GGAAAGCGGATTTTGTGTG	down	-inf	-inf	0.373901	2.68041	0	middle
PC-3p-670907_5	GAAAGAAAGGGACTCGCAA	down	-inf	-inf	0.373901	2.23367	0	middle
PC-3p-496797_6	CTGTACCTTGAATTTCTTGG	up	inf	inf	0.373901	0	1.8579	low
PC-5p-644547_5	CCTCAATCCTCCGGGAGAA	up	inf	inf	0.373901	0	0.683771	low
PC-5p-271466_14	AATGGCTATCCCTGAACCACT	down	-inf	-inf	0.373901	0.747525	0	low
PC-5p-493357_6	TAGCCAGGTTGACTTTTGT	down	-inf	-inf	0.373901	4.1594	0	middle
PC-3p-546023_6	ATGGGAATCAGGCACTTTA	down	-inf	-inf	0.373901	2.68041	0	middle
PC-5p-431244_7	GTTTCCGGGTGAAGAGACCA	up	inf	inf	0.373901	0	0.667724	low
PC-5p-758345_5	ACTTGGCTACTGGTCAGGG	up	inf	inf	0.373901	0	0.683771	low
PC-3p-617379_5	AGTCTCAATGTGTTGCCCCGGCAG	up	inf	inf	0.373901	0	1.73966	low
PC-3p-535810_6	TGCCAGCACCTTATGAGAA	down	-inf	-inf	0.373901	2.68041	0	middle
PC-5p-741372_5	TGGCTCATCTGAGGTTTTTT	up	inf	inf	0.373901	0	0.683771	low
PC-5p-695434_5	GACATGGCTGAGGTCTCCA	down	-inf	-inf	0.373901	3.46616	0	middle
PC-5p-329231_11	GAGCTGAGGTAGGATGTG	up	inf	inf	0.373901	0	6.61071	middle
PC-5p-186965_24	TCTTAGTAGCTGGAGGAAG	up	inf	inf	0.373901	0	5.19666	middle
PC-5p-713251_5	GGGAGCCCTGAGGAGAGTTT	up	inf	inf	0.373901	0	1.54825	low
PC-3p-701464_5	TAGGGGTGGCAAACTCTAATGC	up	inf	inf	0.373901	0	0.683771	low
PC-3p-646018_5	AATGGGGCAGCTGAGAGGG	up	inf	inf	0.373901	0	0.683771	low
PC-5p-531331_6	CTGGTGAATGTTGATTTTG	up	inf	inf	0.373901	0	0.820525	low
PC-5p-678527_5	TGATGAGACTTTATACTTGA	up	inf	inf	0.373901	0	0.683771	low
PC-3p-755674_5	CCATCATATTATAACCCTG	up	inf	inf	0.373901	0	0.683771	low
PC-5p-94508_59	AACTGTGAAATATGAGAATG	up	inf	inf	0.373901	0	5.3479	middle
PC-5p-767592_5	TCAGCATGTACCCCTGGAA	down	-inf	-inf	0.373901	2.23367	0	middle
PC-3p-640106_5	CTGAGTGTGGCTCAGTCCGG	up	inf	inf	0.373901	0	1.73966	low
PC-3p-718418_5	GTGTGGGGTTGTAGGACAG	up	inf	inf	0.373901	0	1.73966	low
PC-3p-702018_5	GATGTCAACTGGTTGTTGG	down	-inf	-inf	0.373901	2.16978	0	middle
PC-3p-732885_5	CCAATCTTGATTCTTTGAT	down	-inf	-inf	0.373901	2.16978	0	middle
PC-3p-404857_8	AGAGGCCCTGGAGGACTGA	up	inf	inf	0.373901	0	2.4772	middle
PC-5p-359664_9	TGGCAAAGGAGGTGAGAGTG	up	inf	inf	0.373901	0	3.13139	middle
PC-5p-382725_8	GTGTTGAATTGTAGTTTTAG	down	-inf	-inf	0.373901	5.54586	0	middle
PC-3p-667758_5	TGGACCTCAAATAAGAAAA	up	inf	inf	0.373901	0	1.73966	low
PC-3p-279815_13	TTTCCGGTCTATTCCTCCA	down	-inf	-inf	0.373901	5.64142	0	middle
PC-3p-545752_6	GGTATTGTAAGCAGTAGAG	up	inf	inf	0.373901	0	2.08759	middle
PC-3p-658577_5	TGTGAGGGTGGGCAAATCT	down	-inf	-inf	0.373901	0.620216	0	low
PC-5p-536046_6	AATCCTGGATGCTGTTCTT	up	inf	inf	0.373901	0	2.08759	middle
PC-5p-268522_14	GATTTTCACTGGCTTGAGC	down	-inf	-inf	0.373901	14.5579	0	middle
PC-5p-393662_8	ATTCCCTTCTGATGCACCA	up	inf	inf	0.373901	0	2.78346	middle
PC-3p-319664_11	GAATCCTGCCACCCCAGCC	up	inf	inf	0.373901	0	3.82726	middle
PC-3p-423726_7	TCCCTGCTGTGACCACCA	down	-inf	-inf	0.373901	3.03769	0	middle
PC-3p-347348_10	GTTAAGAGGGCTCAGGCTT	up	inf	inf	0.373901	0	3.09649	middle
PC-5p-750003_5	GAGGAGGACGAAATGGTTT	up	inf	inf	0.373901	0	1.54825	low
PC-5p-554754_6	AATGTGATATTTATATGTATG	up	inf	inf	0.373901	0	3.82726	middle
PC-3p-713296_5	GAGAAAGGTCTGAGTGTGA	down	-inf	-inf	0.373901	2.16978	0	middle
PC-5p-485051_6	TGCTCTGCTCCCTCTGCGGG	down	-inf	-inf	0.373901	4.1594	0	middle
PC-3p-498422_6	GGTACAACCTGGGTGTGGGCAC	up	inf	inf	0.373901	0	1.8579	low
PC-3p-754890_5	GTTTTGGTAGCTTACTTCTT	down	-inf	-inf	0.373901	3.46616	0	middle
PC-5p-410165_8	TACCCGAGAGCTGACAAAT	up	inf	inf	0.373901	0	2.78346	middle
PC-5p-697700_5	TGCTGAGGTGGGAACTTTC	up	inf	inf	0.373901	0	1.73966	low
PC-5p-738454_5	TACCTGGACAAGGCGGCTG	down	-inf	-inf	0.373901	3.46616	0	middle
PC-5p-562125_6	TTAAAGGCTTGTAAAGGAT	up	inf	inf	0.373901	0	2.08759	middle
PC-5p-473096_6	CCCGGCTGTGTGCGGCGCT	up	inf	inf	0.373901	0	3.40614	middle
PC-3p-363336_9	AGCAGGGCTGGTCCTCACG	up	inf	inf	0.373901	0	3.13139	middle
PC-5p-382003_8	CAACACTGACACTGAGGC	up	inf	inf	0.373901	0	4.95439	middle
PC-3p-281790_13	TGGCACTGACCAGGGGAAT	up	inf	inf	0.373901	0	4.02544	middle
PC-3p-520740_6	GGGGTAATGGCTGAGTGGT	up	inf	inf	0.373901	0	2.08759	middle
PC-5p-756483_5	GCCCGTGTGAAGCTCCTTC	up	inf	inf	0.373901	0	1.54825	low
PC-5p-666165_5	TACACAGGTGGTGCATGGC	down	-inf	-inf	0.373901	3.46616	0	middle
PC-5p-563240_6	CTTACAATCAGTAGGAGGA	down	-inf	-inf	0.373901	4.1594	0	middle
PC-3p-353076_10	CAAGAGGTGTCAGAAAAATT	up	inf	inf	0.373901	0	3.09649	middle
PC-5p-73770_80	GTCCATGTGCTGTTAACTT	up	inf	inf	0.373901	0	10.9403	middle
PC-3p-591481_5	TACAAGGCTGTCTTTTGGTA	up	inf	inf	0.373901	0	1.54825	low
PC-3p-370667_9	TGAGGGTTGTTGTGCAGCTT	up	inf	inf	0.373901	0	3.13139	middle
PC-5p-614879_5	CATTGTATTTTGGTTTTTTC	up	inf	inf	0.373901	0	0.683771	low
PC-5p-372835_9	TGTGCTGATTACGTCCCT	up	inf	inf	0.373901	0	3.13139	middle
PC-3p-224714_18	TATATCTATTTTGCTGAGT	up	inf	inf	0.373901	0	2.46157	middle
PC-3p-705496_5	TGTCCCTGCCCTTTGTACA	down	-inf	-inf	0.373901	3.46616	0	middle
PC-3p-521442_6	TGGGCACGTTGGGCCTTGG	down	-inf	-inf	0.373901	2.60373	0	middle
PC-5p-763754_5	CCAGCATCGATTTCTGTAGG	down	-inf	-inf	0.373901	3.46616	0	middle
PC-3p-326078_11	GTCCTGGTGCTGATTTCTT	up	inf	inf	0.373901	0	3.82726	middle
PC-5p-767757_5	GTGATATTGTGTGGAAAAA	up	inf	inf	0.373901	0	0.683771	low
PC-5p-702415_5	CTGGCGACTGGTGGCCGCG	up	inf	inf	0.373901	0	0.683771	low
PC-5p-159403_30	CAGGAAGGTGACCATGGA	up	inf	inf	0.373901	0	6.97446	middle
PC-3p-470288_6	AAATTTGAAAGCTGGCTCC	up	inf	inf	0.373901	0	1.8579	low
PC-3p-159283_30	CCTGAGATCGCAGCTCAAAG	up	inf	inf	0.373901	0	7.65823	middle
PC-5p-493236_6	AATTGTAATCTATAGAATTT	down	-inf	-inf	0.373901	5.20747	0	middle
PC-5p-443890_7	CTTATTTCGTTGGTTTCT	up	inf	inf	0.373901	0	1.64105	low
PC-3p-505722_6	TAAATAGGTAAGATAGAGT	down	-inf	-inf	0.373901	4.1594	0	middle
PC-5p-748947_5	AAACAGAGTGTTCCAGACA	down	-inf	-inf	0.373901	2.23367	0	middle
PC-3p-643592_5	GTGAAAAATGACCAAGAAAT	up	inf	inf	0.373901	0	1.54825	low
PC-5p-677894_5	AAGTAATTTATAGAAGCTCAG	down	-inf	-inf	0.373901	3.46616	0	middle
PC-5p-637807_5	AGTGTGGAAGAGATAACCG	up	inf	inf	0.373901	0	1.73966	low
PC-5p-337381_10	CTTGTTGTTGCAATAGTAAT	up	inf	inf	0.373901	0	1.36754	low
PC-5p-603222_5	GTAGGGGTAAAGAGAATTT	up	inf	inf	0.373901	0	0.683771	low
PC-5p-517673_6	CTCCACCCTGGACAAGTGGC	up	inf	inf	0.373901	0	2.08759	middle
PC-3p-603892_5	GCCGAAGCTGTGAGATAGA	up	inf	inf	0.373901	0	1.73966	low
PC-5p-633146_5	AGCTGACAGGTACTAAAAA	up	inf	inf	0.373901	0	0.683771	low
PC-5p-270826_14	GTGGACAGTATCATTCTT	down	-inf	-inf	0.373901	1.17468	0	low
PC-3p-122270_43	AGGATAGGTGGGAGGCTGT	down	-inf	-inf	0.373901	25.0172	0	middle
PC-3p-539561_6	TAGTCTATATGTTGTGACC	up	inf	inf	0.373901	0	2.08759	middle
PC-3p-320890_11	ACACAGTGCACATAGGCTT	down	-inf	-inf	0.373901	4.91408	0	middle
PC-5p-758995_5	TCAGTTTCGTTCTATACAA	up	inf	inf	0.373901	0	1.73966	low
PC-3p-280235_13	CTGTATTTATTCTTCTGGAG	up	inf	inf	0.373901	0	1.24006	low
PC-3p-196474_22	TCCCTGTTCGGGCGCCTTT	down	-inf	-inf	0.373901	1.17468	0	low
PC-3p-553456_6	TGGAACAGTGACGCAAGTGAA	down	-inf	-inf	0.373901	4.1594	0	middle
PC-3p-188620_23	TCAGTGAGGACAGAAACCT	up	inf	inf	0.373901	0	9.59913	middle
PC-3p-470521_6	AGAGGAACTCTCATGTCAT	up	inf	inf	0.373901	0	2.08759	middle
PC-5p-651908_5	GCAGGGCTGATGACTGGGG	down	-inf	-inf	0.373901	3.46616	0	middle
PC-3p-402595_8	TGCCTTGCCCTCTCCCTCTAGT	down	-inf	-inf	0.373901	0.747525	0	low
PC-3p-557655_6	CATATTTACTGTTTACGAG	down	-inf	-inf	0.373901	4.77351	0	middle
PC-5p-106672_51	TTTCCCCCAGGATAGCTGG	up	inf	inf	0.373901	0	6.97446	middle
PC-5p-526295_6	AAATGACGTGACTTTTCTT	up	inf	inf	0.373901	0	1.8579	low
PC-5p-691079_5	TCATTTTCTCTGTTTAAAGC	up	inf	inf	0.373901	0	0.683771	low
PC-5p-662412_5	GCAAATCAGTTGATTGAAAC	up	inf	inf	0.373901	0	1.54825	low
PC-5p-402787_8	TTGGAGATAGGGTTTTTATAGT	down	-inf	-inf	0.373901	5.54586	0	middle
PC-3p-274065_14	CCTAGACAATGGATGTGA	up	inf	inf	0.373901	0	7.79499	middle
PC-5p-661245_5	CTTGAATTTTTCAAAAACTT	up	inf	inf	0.373901	0	0.683771	low
PC-5p-676224_5	GAGTAGGTTTCCATGTGAAC	down	-inf	-inf	0.373901	0.620216	0	low
PC-3p-539913_6	ACCTGTGTGCTGCCAGCTT	down	-inf	-inf	0.373901	4.1594	0	middle
PC-5p-740517_5	CGGAGCTGCTGAGCTGCGGG	up	inf	inf	0.373901	0	0.683771	low
PC-3p-651133_5	CTGCATCTGAAATCAGGC	down	-inf	-inf	0.373901	2.23367	0	middle
PC-3p-638139_5	GGGGCTGGGAATCAGTGTGG	down	-inf	-inf	0.373901	0.620216	0	low
PC-3p-481977_6	TAAAAACCGTGACTACTTCTGT	down	-inf	-inf	0.373901	0.744259	0	low
PC-3p-471569_6	GTGCACTGACGCTGGAATAGCT	up	inf	inf	0.373901	0	2.08759	middle
PC-3p-502178_6	ATTTATAGAAGCTCAGGTA	down	-inf	-inf	0.373901	4.1594	0	middle
PC-5p-542494_6	TATTGGAAGAATATCAGGC	down	-inf	-inf	0.373901	4.1594	0	middle
PC-3p-732472_5	TAGCAGTGAGTAGGAGGGC	down	-inf	-inf	0.373901	2.16978	0	middle
PC-3p-609704_5	TATACAATGAAGAGTTTGAT	down	-inf	-inf	0.373901	0.620216	0	low
PC-3p-715907_5	TCGGAGCCTGAGGTTGCTGTGA	up	inf	inf	0.373901	0	1.73966	low
PC-5p-205976_21	TCACTGTTGGGACATGTG	up	inf	inf	0.373901	0	4.37613	middle
PC-3p-411373_8	GATTCCTGTACTACTCCTT	up	inf	inf	0.373901	0	6.95865	middle
PC-5p-516554_6	AGCCCCGTCTGGATGGATA	down	-inf	-inf	0.373901	4.1594	0	middle
PC-3p-512532_6	CAGTTGGCTTCTTCTCTGCA	up	inf	inf	0.373901	0	0.820525	low
PC-5p-524229_6	ATTGGTCAGGCTTTGAAGT	up	inf	inf	0.373901	0	2.08759	middle
PC-3p-626512_5	TTGGATTTATTAAAGACTA	down	-inf	-inf	0.373901	2.23367	0	middle
PC-5p-294293_12	TCTTTGCTTATGTAAAACTC	down	-inf	-inf	0.373901	5.36082	0	middle
PC-3p-723068_5	GTAGTAGCTCATAGATGTCTG	down	-inf	-inf	0.373901	0.620216	0	low
PC-3p-141066_35	TGTGGGTTTGCCTGGCTC	up	inf	inf	0.373901	0	5.74367	middle
PC-3p-444120_7	ATGGATTTTGTTGTTTATTG	up	inf	inf	0.373901	0	2.43553	middle
PC-5p-461485_7	TTGATTAAGAATTGTAATTT	up	inf	inf	0.373901	0	2.43553	middle
PC-3p-729870_5	TCGAGCCATGCGCCGTCCT	up	inf	inf	0.373901	0	1.73966	low
PC-3p-631702_5	AACAGAGCTACTTTTTTCA	up	inf	inf	0.373901	0	1.73966	low
PC-3p-567249_6	TTGGAATGCGGCGCCTGAG	down	-inf	-inf	0.373901	2.68041	0	middle
PC-5p-529171_6	GGAGGATACTGAACCTGAA	up	inf	inf	0.373901	0	0.820525	low
PC-5p-446622_7	TGAACTATAGCAAAAGCTGTT	down	-inf	-inf	0.373901	4.85263	0	middle
PC-3p-579498_5	CCTCCAAGAAAAGCTCGAA	up	inf	inf	0.373901	0	1.73966	low
PC-5p-383749_8	ATTCCTGTACCACTTTTAG	up	inf	inf	0.373901	0	2.4772	middle
PC-5p-514735_6	ATCTGCTGAGGTTCAGCCC	up	inf	inf	0.373901	0	2.08759	middle
PC-3p-429778_7	AGAGGTACTCGAGTTGAA	down	-inf	-inf	0.373901	10.7216	0	middle
PC-5p-517812_6	GGCAACAAGTGCAGTGGTAAGG	up	inf	inf	0.373901	0	0.820525	low
PC-5p-31295_193	CGATCGGTTGTTCCTTGTG	up	inf	inf	0.373901	0	38.1544	middle
PC-5p-740605_5	AAAGGGAAGCAGGTCAATA	down	-inf	-inf	0.373901	0.620216	0	low
PC-3p-330374_11	TTTCCGCGTGGAGGCACCA	up	inf	inf	0.373901	0	3.40614	middle
PC-3p-664367_5	GAGTTCTTAGTGGGCCATT	down	-inf	-inf	0.373901	2.23367	0	middle
PC-3p-668995_5	AGATACAAGCCTGACTGTG	up	inf	inf	0.373901	0	1.54825	low
PC-5p-719252_5	AGAGATAAGAGAAATCTGTT	down	-inf	-inf	0.373901	2.23367	0	middle
PC-5p-374384_9	TCGTTGAAAAGGAAGCAGT	down	-inf	-inf	0.373901	4.02061	0	middle
PC-3p-611109_5	CTTGGAAAGGGGTATCATA	down	-inf	-inf	0.373901	3.46616	0	middle
PC-5p-561256_6	TGTTATTTTAGTAGAATGATG	down	-inf	-inf	0.373901	2.68041	0	middle
PC-5p-385317_8	GAGTTTAGATTTCCTTGAAT	up	inf	inf	0.373901	0	1.09403	low
PC-3p-566462_6	TGTGAGAAATCATAAGTTTT	up	inf	inf	0.373901	0	2.08759	middle
PC-5p-421290_7	AAGAAGAATGAAAGAAAAAATG	down	-inf	-inf	0.373901	4.85263	0	middle
PC-3p-710017_5	CTTTTTATCATTTTTTGCT	up	inf	inf	0.373901	0	0.683771	low
PC-5p-772866_5	CCACTCGGCTGAAGCAGGC	up	inf	inf	0.373901	0	1.54825	low
PC-5p-708328_5	GTAATGAGGAGATCACTGG	up	inf	inf	0.373901	0	1.73966	low
PC-3p-376639_9	TTAAGTAGAGATGCAACATT	up	inf	inf	0.373901	0	1.23079	low
PC-3p-374461_9	CAATTGTTTACTTTGAGAAA	up	inf	inf	0.373901	0	0.858502	low
PC-5p-262429_15	TACTTATTTGGTGAAACG	up	inf	inf	0.373901	0	5.19666	middle
PC-5p-524005_6	AAGCACATAAATCTCTCAAA	down	-inf	-inf	0.373901	4.1594	0	middle
PC-5p-454670_7	CGAGTCCTGCCTGGGGCGCCA	down	-inf	-inf	0.373901	4.85263	0	middle
PC-3p-223511_18	CAAGATGAGATCTCCCGGG	up	inf	inf	0.373901	0	5.57369	middle
PC-5p-758855_5	AAGCTACCATCTGAGGGCT	up	inf	inf	0.373901	0	0.683771	low
PC-3p-149750_32	AATTGAGACCTATCGCTCTT	down	-inf	-inf	0.373901	32.5819	0	middle
PC-5p-190270_23	TTTCCCGGACGAGGAACC	up	inf	inf	0.373901	0	9.74211	middle
PC-5p-260513_15	TCTTTGGTAGTATAGTGGTCA	up	inf	inf	0.373901	0	3.33862	middle
PC-5p-422898_7	CTCTTTCATTGCTCTCTTTGA	down	-inf	-inf	0.373901	4.85263	0	middle
PC-3p-525779_6	TGGAGAACTTCCGTGCCTA	up	inf	inf	0.373901	0	2.08759	middle
PC-5p-768895_5	GTAAAGGGGGTAGAGGGAA	down	-inf	-inf	0.373901	2.16978	0	middle
PC-3p-528385_6	TGGTAAATTTCATCTAAAGC	down	-inf	-inf	0.373901	0.744259	0	low
PC-5p-355142_10	CAGAGAGGCCCTGGAGGAC	up	inf	inf	0.373901	0	3.09649	middle
PC-5p-206974_21	GTTGTGATGCTGTTTCCCT	down	-inf	-inf	0.373901	14.2113	0	middle
PC-5p-372083_9	GTCACAAATCCTCTGTAGACG	down	-inf	-inf	0.373901	11.6151	0	middle
PC-5p-710491_5	AAGCAAAGAAGCACTTATGAGT	down	-inf	-inf	0.373901	3.46616	0	middle
PC-5p-126073_41	CACGGTGCCCGGGGTAGAG	up	inf	inf	0.373901	0	6.42744	middle
PC-3p-394185_8	CTTCTCTCTCTGATCTCCAAAT	up	inf	inf	0.373901	0	0.763113	low
PC-5p-561250_6	TATTGTGATGGTTCATTTTCT	up	inf	inf	0.373901	0	2.08759	middle
PC-5p-559216_6	TGGAACTGCAGCTGAAACG	up	inf	inf	0.373901	0	1.8579	low
PC-3p-477705_6	TTGAAGCTATGGTGGGCCATG	up	inf	inf	0.373901	0	1.8579	low
PC-3p-621358_5	CAGCAGGCCTGACTGAGGA	up	inf	inf	0.373901	0	1.73966	low
PC-5p-665279_5	AGCCCTTGTTACTTAATTG	down	-inf	-inf	0.373901	2.23367	0	middle
PC-3p-713682_5	AACAATGCTGGATTATTCT	up	inf	inf	0.373901	0	1.54825	low
PC-5p-668457_5	CCTGGATATGGATTCTTCA	down	-inf	-inf	0.373901	3.46616	0	middle
PC-3p-735118_5	TCCTGGATGCCTACTGACG	up	inf	inf	0.373901	0	0.683771	low
PC-5p-655882_5	GGTGGTGAGCAGGCACGGGCTGT	up	inf	inf	0.373901	0	1.73966	low
PC-5p-571554_5	GACGGCGCGGGCCCCGGGCAG	up	inf	inf	0.373901	0	1.54825	low
PC-3p-324964_11	CTCAGGATAGCTGGAACATT	down	-inf	-inf	0.373901	4.91408	0	middle
PC-5p-186887_24	AGAGTGGAGTTGTGGGAAT	up	inf	inf	0.373901	0	3.91095	middle
PC-5p-710416_5	TGGGTAGTCTAGTGGTTATG	down	-inf	-inf	0.373901	0.620216	0	low
PC-3p-159867_30	GTGGACTCAAAAATCTGATC	up	inf	inf	0.373901	0	1.99124	low
PC-3p-760453_5	GAAAGTGGACGTATAGGGT	up	inf	inf	0.373901	0	1.54825	low
PC-5p-442654_7	GCACCCGAACTTCTTGAAA	down	-inf	-inf	0.373901	4.85263	0	middle
PC-5p-547822_6	GCTAAGAAGTTGAACATCA	up	inf	inf	0.373901	0	0.820525	low
PC-3p-308313_12	CATTGAACTGAAGGGATGA	down	-inf	-inf	0.373901	8.24516	0	middle
PC-5p-500526_6	AATTAGAGTGTTTCAGGCG	down	-inf	-inf	0.373901	2.68041	0	middle
PC-3p-275992_14	GAACCCTGGGTGCTGTACTT	up	inf	inf	0.373901	0	1.90778	low
PC-5p-581344_5	TCAGCATCTGTTACATATTTAAT	up	inf	inf	0.373901	0	0.683771	low
PC-5p-335627_10	CCAACCGGGATTGCCTTA	down	-inf	-inf	0.373901	10.3985	0	middle
PC-3p-740508_5	TAAATGGGTGTGATAAGTT	up	inf	inf	0.373901	0	3.47932	middle
PC-5p-773559_5	ATTTTTAGTACTTGTACTC	down	-inf	-inf	0.373901	0.620216	0	low
PC-3p-368693_9	AGCTTGACTCTAGTTTGTA	up	inf	inf	0.373901	0	3.13139	middle
PC-3p-460041_7	TTTACTGTTGCTACTGTTACTAG	up	inf	inf	0.373901	0	0.739603	low
PC-3p-302154_12	TAAAGACGTGCATGAATG	up	inf	inf	0.373901	0	8.00244	middle
PC-3p-515763_6	AGGTGTCCTAAGATGAGC	up	inf	inf	0.373901	0	3.82726	middle
PC-5p-112730_47	AGGAAAAGAAACTAACAAGTA	up	inf	inf	0.373901	0	6.42744	middle
hsa-miR-139-5p	TCTACAGTGCACGTGTCTCCAGT	up	1.25131	0.323434	0.376101	986.946	1234.97	high
PC-5p-213416_20	GTGGGAGCTCCGGCGCACA	down	0.203899	-2.29407	0.382385	2.10521	0.429251	low
hsa-miR-374a-3p	CTTATCAGATTGTATTGTAATT	down	0.820362	-0.285667	0.383044	201.224	165.077	middle
hsa-miR-1323	TCAAAACTGAGGGGCATTTTCT	up	2.34089	1.22705	0.384235	3.41145	7.98582	middle
PC-3p-85147_67	GTGAAGACGAGTAGGGCGGG	up	37.6952	5.23631	0.385521	0.854314	32.2035	middle
hsa-miR-3065-5p	TCAACAAAATCACTGATGCTGGA	up	2.08485	1.05994	0.385799	3.34334	6.97037	middle
hsa-miR-1226-3p	TCACCAGCCCTGTGTTCCCTAG	down	0.344366	-1.53798	0.386747	1.38499	0.476945	low
PC-5p-9705_504	CATGTAGAACAAAAGGGTA	down	0.484216	-1.04628	0.386817	155.89	75.4845	middle
PC-3p-35335_172	TCACCATGTGAATCTGTGT	down	0.553696	-0.852835	0.387277	50.3211	27.8626	middle
hsa-miR-424-5p_R-1	CAGCAGCAATTCATGTTTTGA	up	1.19371	0.255447	0.38765	134.478	160.527	middle
hsa-miR-222-5p_R-1	CTCAGTAGCCAGTGTAGATCC	up	3.19984	1.678	0.388559	0.320368	1.02513	low
hsa-miR-219a-5p_R+2	TGATTGTCCAAACGCAATTCTCG	up	1.98602	0.989882	0.389199	2.53053	5.02569	middle
PC-3p-230519_18	GATTACGAATAGATACTTT	down	0.0355875	-4.81249	0.389596	13.402	0.476945	middle
PC-3p-58428_104	GGGGGAGTATGGTCGCAA	down	0.587957	-0.766217	0.39028	20.7355	12.1916	middle
PC-3p-168463_27	CATCTTTTACTGTGAAAAAA	down	0.0886826	-3.4952	0.397347	8.58576	0.761408	middle
hsa-miR-6842-3p	TTGGCTGGTCTCTGCTCCGCAG	up	2.22973	1.15687	0.400778	0.854314	1.90489	low
PC-5p-74271_79	GAGTAGGTAGCTGCCATATT	down	0.501297	-0.996263	0.402289	27.389	13.73	middle
PC-3p-161065_29	CTTGAGTATACTGGTTCCT	down	0.352952	-1.50245	0.403047	17.5462	6.19299	middle
hsa-miR-374a-5p	TTATAATACAACCTGATAAGTG	down	0.90112	-0.150208	0.403982	1477.61	1331.5	high
PC-5p-12254_424	CTTGACTGAGGTTGACAAA	down	0.529151	-0.91825	0.404089	130.906	69.2693	middle
PC-3p-254486_15	AATAAAGTAGATAAGGGAA	down	0.0688002	-3.86144	0.405013	6.93233	0.476945	middle
PC-5p-190101_23	CTCAATGAGAACAGAAATC	down	0.31477	-1.66763	0.405284	8.84283	2.78346	middle
hsa-miR-132-5p	ACCGTGGCTTTCGATTGTTACT	up	2.76718	1.46842	0.406785	0.907709	2.51179	low
hsa-miR-148b-5p_L+1R+1	GAAGTTCTGTTATACACTCAGGCT	up	1.57023	0.650978	0.410101	19.2505	30.2277	middle
hsa-miR-135a-5p	TATGGCTTTTTATTCCTATGTGA	down	0.65963	-0.600271	0.412918	27.8527	18.3725	middle
PC-3p-29734_202	GCATTGCGATGGCCAGAA	down	0.525621	-0.927906	0.413994	115.226	60.5654	middle
PC-5p-302995_12	CTTTGTATCATAATCTGGTC	down	0.370788	-1.43134	0.414275	9.21703	3.41756	middle
hsa-miR-5001-3p	TTCTGCCTCTGTCCAGGTCCTT	down	0.153773	-2.70112	0.414478	5.91962	0.910281	middle
PC-5p-118514_44	ACTCGGCCATGGAAGTAAG	down	0.499139	-1.00249	0.418337	23.3364	11.6481	middle
hsa-miR-431-3p	CAGGTCGTCTTGCAGGGCTTCT	down	0.0968646	-3.36789	0.418638	2.9367	0.284463	middle
hsa-miR-148a-3p	TCAGTGCACTACAGAACTTTGT	down	0.682476	-0.551149	0.424221	2234.58	1525.05	high
hsa-miR-29a-5p_R+1	ACTGATTTCTTTTGGTGTTCAGA	up	2.44812	1.29167	0.424536	1.61419	3.95174	middle
PC-3p-299554_12	CTTCTATCGAAAGGGAATT	down	0.114896	-3.1216	0.427687	3.46616	0.398248	middle
PC-5p-42119_145	GCAGTAGAGTAGCCTTGTT	down	0.436873	-1.19471	0.427744	49.206	21.4967	middle
hsa-miR-181a-3p	ACCATCGACCGTTGATTGTACC	up	1.57117	0.651843	0.428604	26.5177	41.6638	middle
hsa-miR-20b-5p	CAAAGTGCTCATAGTGCAGGTAG	down	0.833411	-0.262899	0.430636	375.498	312.944	middle
PC-5p-236856_17	CGTAGAATAAGTGGGAGCCCT	down	0.122311	-3.03137	0.431476	6.23909	0.763113	middle
hsa-miR-939-5p	TGGGGAGCTGAGGCTCTGGGGGTG	up	2.58163	1.36829	0.431706	0.427157	1.10276	low
hsa-miR-331-5p_R-1	CTAGGTATGGTCCCAGGGATC	down	0.544728	-0.876391	0.431742	8.31598	4.52995	middle
PC-3p-84574_68	CAAATCCAGCCTGAGCCACCA	down	0.468262	-1.09461	0.43182	22.7736	10.664	middle
hsa-mir-452-p3	TCAGTCTCATCTGCAAAGAAGT	up	2.11921	1.08352	0.43343	2.45615	5.2051	middle
PC-3p-50941_120	ATCAGGAGGTTTGCTTAGAA	down	0.570115	-0.810676	0.435018	20.4993	11.6869	middle
PC-3p-289347_13	GGCTAAAACAGTCAGGATG	down	0.13131	-2.92896	0.436128	3.46616	0.45514	middle
hsa-miR-106a-3p_L+2R-3	TACTGCAATGTAAGCACTTCT	down	0.658061	-0.603708	0.437503	19.1869	12.6261	middle
PC-5p-100396_55	AGGGCGTGGAGGTTTGTGAA	down	0.203639	-2.29591	0.438009	23.92	4.87105	middle
PC-5p-25715_230	AATCCGTGATTGGGCTCCA	down	0.503704	-0.989351	0.438481	38.5966	19.4413	middle
PC-5p-309968_12	CAGTCTGGTGGGGAGTTTG	down	0.1376	-2.86144	0.439414	4.1594	0.572335	middle
PC-3p-348524_10	GGTTTTTACTTCTGGGGTC	down	0.139145	-2.84534	0.440225	4.91408	0.683771	middle
PC-5p-298891_12	CAGGACCGACAGTGACCCCT	down	0.140907	-2.82718	0.441153	4.85263	0.683771	middle
hsa-miR-106b-3p_L+2R-2	TACCGCACTGTGGGTACTTGCT	down	0.910563	-0.135169	0.441383	721.385	656.867	middle
PC-5p-98647_56	CGGCGGGAATGTGGCTCCT	down	0.490159	-1.02868	0.441982	12.7479	6.24848	middle
PC-3p-50662_121	CAGTAAGGGCGACTGAAGG	down	0.479145	-1.06147	0.443322	46.7908	22.4196	middle
hsa-miR-342-5p_R+1	AGGGGTGCTATCTGTGATTGAG	up	1.4757	0.561401	0.443959	24.3599	35.948	middle
PC-3p-50517_121	ATTCCCAGTCTGGACACCA	down	0.487109	-1.03768	0.445438	24.9613	12.1589	middle
PC-5p-1295_2421	ACTGACCCTGGAATCGGAT	down	0.587288	-0.767859	0.447466	1347.98	791.654	high
hsa-miR-101-5p_L+1	TCAGTTATCACAGTGCTGATGCT	down	0.576748	-0.793987	0.447485	7.98869	4.60747	middle
PC-5p-572881_5	CTTGGGAGAAAGGTCTGAGT	up	6.51624	2.70404	0.447828	0.266973	1.73966	low
hsa-miR-184_R-2	TGGACGGAGAACTGATAAGG	up	2.57991	1.36732	0.452434	11.6809	30.1357	middle
hsa-miR-548aq-3p_L+1R-1	GCAAAAACTGCAATTACTTTTG	up	2.7866	1.47851	0.453741	0.320368	0.892737	low
PC-5p-146166_33	AGTAGTACTGAAGTAGGAGA	up	2.20185	1.13872	0.454482	6.70057	14.7536	middle
PC-5p-56062_108	AATTTTTTAGAGTTTGTAT	down	0.486177	-1.04045	0.455668	23.3138	11.3346	middle
hsa-miR-140-3p_R+1	TACCACAGGGTAGAACCACGGA	up	1.11138	0.152348	0.45617	2791.84	3102.78	high
hsa-miR-501-3p	AATGCACCCGGGCAAGGATTCT	down	0.861924	-0.214367	0.457909	39.5321	34.0737	middle
hsa-miR-4523_R+2	GACCGAGAGGGCCTCGGCTGTTT	up	5.79926	2.53587	0.458132	0.266973	1.54825	low
hsa-miR-4687-5p	CAGCCCTCCTCCCGCACCCAAA	up	5.79926	2.53587	0.458132	0.266973	1.54825	low
PC-3p-351247_10	TCATAGATGAAATAAGTAG	up	5.79926	2.53587	0.458132	0.266973	1.54825	low
PC-3p-5591_756	ATGCTCTCGGCCTATTCTCA	down	0.610292	-0.71243	0.459214	389.729	237.849	middle
hsa-miR-454-5p	ACCCTATCAATATTGTCTCTGC	down	0.611804	-0.708859	0.460346	11.7663	7.19869	middle
PC-3p-140584_35	CAGCTGAGAGGGTGAGACTC	down	0.491168	-1.02571	0.461066	9.09395	4.46666	middle
hsa-miR-320d_R-1	AAAAGCTGGGTTGAGAGG	down	0.579353	-0.787486	0.461279	1.50957	0.874575	low
PC-5p-257740_15	AATAATAGAATAGGACATC	up	5.60986	2.48796	0.461346	0.620216	3.47932	middle
hsa-miR-7706_R-1	TGAAGCGCCTGTGCTCTGCCGAG	up	2.50163	1.32287	0.462418	0.587341	1.46931	low
hsa-miR-4659a-3p_L-1R+1	TTCTTCTTAGACATGGCAACGT	up	5.4302	2.44101	0.464627	0.320368	1.73966	low
hsa-miR-378f_R+1_1ss14CT	ACTGGACTTGGAGTCAGAAGT	up	2.44457	1.28958	0.46485	0.124587	0.304563	low
PC-3p-5723_744	AGGTCAGCTCAATGAGAACA	down	0.609843	-0.71349	0.465427	536.671	327.285	high
hsa-miR-766-3p	ACTCCAGCCCCACAGCCTCAGC	down	0.524747	-0.930305	0.465741	42.8021	22.4603	middle
PC-3p-34155_178	ACTCTTCCCAGGGTCACCA	down	0.593679	-0.752245	0.466242	33.1274	19.667	middle
hsa-miR-92b-3p	TATTGCACTCGTCCCGGCCTCC	up	1.47454	0.560266	0.467349	12.717	18.7518	middle
hsa-let-7c-5p	TGAGGTAGTAGGTTGTATGGTT	up	1.18339	0.242931	0.467573	163.513	193.501	middle
PC-5p-260006_15	TCGTGAAGAGGAAAATATT	down	0.280607	-1.83337	0.467981	2.43675	0.683771	middle
hsa-miR-5094_L-1R+3	ATCAGTGAATGCCTTGAACCTAAC	down	0.19727	-2.34175	0.472012	3.46616	0.683771	middle
PC-5p-36534_167	GCAGATTGCTATGACTATT	down	0.704693	-0.504932	0.472422	23.3625	16.4634	middle
hsa-miR-181a-5p	AACATTCAACGCTGTCGGTGAGT	up	1.20958	0.274512	0.476653	595.093	719.815	high
hsa-mir-4659b-p3	CTTCTTAGACATGGCAGCTTCAG	down	0.207905	-2.26601	0.478091	2.18918	0.45514	middle
hsa-miR-548bc_R+1	AAAAACTGTGATTACTTTTGCA	down	0.507859	-0.977499	0.478398	9.64939	4.90053	middle
PC-3p-153251_31	CTTGGAAAAGGGCAGCTGAGA	down	0.222938	-2.16529	0.47845	62.1249	13.85	middle
PC-3p-19775_291	GAAGTGGGGTTGTGGGAAT	down	0.547326	-0.869527	0.47877	61.9357	33.899	middle
hsa-miR-144-5p_R+1	GGATATCATCATATACTGTAAGT	down	0.846775	-0.239949	0.47952	2659.96	2252.39	high
PC-3p-108971_49	CCTTGTTCTTAGTTGCCTT	up	2.01775	1.01275	0.480908	4.1069	8.2867	middle
hsa-miR-4665-5p	CTGGGGGACGCGTGAGCGCGAGC	down	0.213102	-2.23038	0.481091	1.33487	0.284463	low
hsa-miR-574-5p	TGAGTGTGTGTGTGTGAGTGTGT	down	0.532752	-0.908464	0.48123	17.0919	9.10572	middle
hsa-miR-1303_L+1	TTTTAGAGACGGGGTCTTGCTCT	down	0.219669	-2.1866	0.481296	3.46616	0.761408	middle
PC-5p-261984_15	CCTCTGTTCCTCTGATTTGT	down	0.219669	-2.1866	0.481296	3.46616	0.761408	middle
PC-3p-53936_113	GTGAAATGCGTAGATATTGG	down	0.581415	-0.782359	0.481332	45.184	26.2707	middle
PC-5p-137239_36	CCAGGAAGTGGATGTTGAG	down	0.35517	-1.49342	0.482316	4.96031	1.76176	middle
hsa-mir-451a-p3	TTTAGTAATGGTAATGGTTCT	down	0.806925	-0.309494	0.482969	34.3732	27.7366	middle
hsa-miR-26a-1-3p	CCTATTCTTGGTTACTTGCACG	down	0.47583	-1.07148	0.483879	3.80174	1.80898	middle
hsa-miR-485-5p_R+1	AGAGGCTGGCCGTGATGAATTCG	up	1.95055	0.963881	0.483881	5.45534	10.6409	middle
hsa-miR-486-3p	CGGGGCAGCTCAGTACAGGAT	up	1.24046	0.310871	0.48512	31.4999	39.0742	middle
hsa-miR-616-5p	ACTCAAAACCCTTCAGTGACTT	up	2.27219	1.18408	0.488767	0.427157	0.970582	low
hsa-miR-10399-3p_L+1_1ss22CT	TCTCTCGGACAAGCTGTAGGTT	up	1.94852	0.962376	0.489257	2.24257	4.36969	middle
hsa-miR-1260a_1ss9TG	ATCCCACCGCTGCCACCA	up	1.54932	0.631631	0.490035	63.1807	97.8869	middle
hsa-miR-1260b_R-1_1ss9AG	ATCCCACCGCTGCCACCA	up	1.54932	0.631631	0.490035	63.1807	97.8869	middle
PC-5p-248365_16	AGTTTTCTTTTCTTGTTAACA	down	0.229334	-2.12448	0.490584	4.1594	0.953891	middle
hsa-let-7b-3p_1ss22CT	CTATACAACCTACTGCCTTCCT	up	1.34169	0.424049	0.495044	16.1823	21.7116	middle
PC-5p-248561_16	ATAATAACGCAGGTGTCCT	down	0.241092	-2.05234	0.497574	10.2749	2.4772	middle
PC-3p-320972_11	GTTTGTATGAGGGTTGAA	up	4.1467	2.05196	0.497612	0.587341	2.43553	middle
hsa-miR-4508_L+2R-1	AAGCGGGGCTGGGCGCGC	up	2.22779	1.15562	0.499902	0.640736	1.42743	low
hsa-miR-338-5p_R-1	AACAATATCCTGGTGCTGAGT	down	0.697497	-0.519742	0.501392	19.4683	13.5791	middle
PC-5p-300769_12	TTAAATTTCTTGGAACAGAA	down	0.354768	-1.49505	0.501528	4.90365	1.73966	middle
hsa-miR-505-5p_R+1	GGGAGCCAGGAAGTATTGATGTT	down	0.80763	-0.308233	0.503212	23.8773	19.2841	middle
hsa-miR-1246_L+1	AAATGGATTTTTGGAGCAGG	up	2.49197	1.31729	0.504588	2.79097	6.95503	middle
hsa-miR-3143_R-3	ATAACATTGTAAAGCGCTTCTT	down	0.523549	-0.933605	0.504801	5.27717	2.76285	middle
PC-5p-63904_94	CGAATCTGGTTCTGGGCAC	down	0.533772	-0.905704	0.505598	34.515	18.4231	middle
PC-5p-134560_37	AATCCTCACTTTGAATCCATGTT	down	0.394634	-1.34141	0.505655	3.66371	1.44582	middle
PC-3p-320852_11	AACTGCATCGTGATGGGGA	down	0.255099	-1.97087	0.506026	2.68041	0.683771	middle
PC-3p-524267_6	CCTTTGTTCTCGGATTTG	down	0.262612	-1.929	0.510613	2.60373	0.683771	middle
hsa-miR-219b-5p	AGATGTCCAGCCACAATTCTCG	up	2.4979	1.32071	0.511835	0.533946	1.33374	low
hsa-miR-376c-5p_L-1R+1	GTGGATATTCCTTCTATGTTT	down	0.269659	-1.89079	0.51495	1.41496	0.381556	low
hsa-miR-376b-5p_L-1	GTGGATATTCCTTCTATGTTT	down	0.269659	-1.89079	0.51495	1.41496	0.381556	low
hsa-miR-183-5p	TATGGCACTGGTAGAATTCACT	down	0.748988	-0.416986	0.518256	153.027	114.615	middle
PC-5p-4153_939	CTCCGTGATTGGGCTCCA	down	0.626268	-0.675148	0.520053	101.282	63.4296	middle
PC-5p-162672_29	AGTAAACCTGCACCGAAAA	down	0.484402	-1.04572	0.523127	11.0972	5.3755	middle
hsa-miR-641_R+1	AAAGACATAGGATAGAGTCACCTCT	down	0.653829	-0.613014	0.523203	14.8809	9.72955	middle
hsa-miR-301a-5p	GCTCTGACTTTATTGCACTACT	up	1.46957	0.555389	0.52382	6.55774	9.63703	middle
hsa-miR-1468-5p_R+1	CTCCGTTTGCCTGTTTCGCTGA	down	0.520267	-0.942676	0.525774	1.86555	0.970582	low
PC-5p-16231_340	CCCGGAGAGGGGGTAGGC	up	1.51924	0.603351	0.525986	66.3174	100.752	middle
hsa-miR-503-5p_R-2_1ss21CA	TAGCAGCGGGAACAGTTCTGA	up	1.50039	0.58534	0.528528	18.9742	28.4687	middle
PC-5p-254152_15	CAGTTTGTCTGGAGATAGG	down	0.295905	-1.75679	0.531383	4.1594	1.23079	middle
hsa-miR-340-5p	TTATAAAGCAATGAGACTGATT	up	1.28587	0.362743	0.533862	514.855	662.036	high
PC-5p-4745_852	CATCGTGATAGGGATAGATTA	down	0.661664	-0.595829	0.535923	466.45	308.633	high
hsa-miR-29c-3p	TAGCACCATTTGAAATCGGTTA	up	1.10164	0.139654	0.536014	372.222	410.055	middle
PC-5p-23639_248	TCGTTGCAAACTAAGAATA	down	0.687627	-0.540302	0.538501	78.8105	54.1922	middle
hsa-miR-6513-3p_R+1	TCAAGTGTCATCTGTCCCTAGA	up	2.37933	1.25056	0.539799	1.28147	3.04904	middle
PC-5p-183181_24	CATCCTGGGGCGGTAGTA	down	0.536112	-0.899395	0.542818	7.13892	3.82726	middle
PC-3p-190225_23	AACAGCGGGGAAAGAAGAC	up	1.9254	0.945155	0.543014	3.12714	6.02099	middle
hsa-miR-370-3p	GCCTGCTGGGGTGGAACCTGGT	down	0.476662	-1.06896	0.544117	226.283	107.861	middle
hsa-miR-329-3p	AACACACCTGGTTAACCTCTTT	down	0.470908	-1.08648	0.54624	54.3175	25.5785	middle
hsa-miR-501-5p_R+2	AATCCTTTGTCCCTGGGTGAGAGT	down	0.499152	-1.00245	0.546246	1.36774	0.682711	low
hsa-mir-641-p3	TGACTGTCCTATGTCTTTCCTT	down	0.319653	-1.64542	0.546618	1.60184	0.512033	low
hsa-miR-532-5p	CATGCCTTGAGTGTAGGACCGT	up	1.08281	0.114778	0.546965	192.826	208.794	middle
PC-3p-61957_97	GTCTGAGTAACCTGCTGTT	down	0.609054	-0.715358	0.547129	18.618	11.3394	middle
PC-5p-44881_136	TTACTGTAACCTGAAATTGAA	down	0.633695	-0.658139	0.548778	82.8391	52.4948	middle
hsa-miR-122-5p	TGGAGTGTGACAATGGTGTTTG	down	0.735711	-0.442789	0.551672	395.962	291.314	middle
hsa-miR-1270	CTGGAGATATGGAAGAGCTGTGT	down	0.327608	-1.60996	0.551794	0.868302	0.284463	low
hsa-miR-140-5p	CAGTGGTTTTACCCTATGGTAG	down	0.904786	-0.144351	0.552447	409.73	370.718	middle
PC-5p-42160_145	GAGTTTGGCTGGGGCGGC	down	0.613739	-0.704302	0.553218	42.1131	25.8465	middle
PC-3p-179908_25	GCTCTGAGGATTGGGTGTCA	down	0.330415	-1.59765	0.553629	14.7422	4.87105	middle
hsa-miR-1277-3p_R-1	TACGTAGATATATATGTATTT	up	1.37473	0.459144	0.555456	28.4893	39.1649	middle
PC-5p-252675_15	GATGCAGAGTTCTTAGTGG	down	0.334599	-1.5795	0.556372	6.23909	2.08759	middle
PC-3p-254420_15	ACTTTGTATCATAATCTGGTC	down	0.340615	-1.55379	0.557203	9.01202	3.06963	middle
hsa-miR-544b	ACCTGAGGTTGTGCATTTCTAA	down	0.337074	-1.56886	0.558	2.82992	0.953891	middle
hsa-miR-133a-3p_R+1	TTTGGTCCCCTTCAACCAGCTGT	up	1.66903	0.739012	0.559329	11.4531	19.1157	middle
hsa-miR-548aa_L-1R-2	AAAACCACAATTACTTTTGCAC	down	0.672751	-0.571856	0.562392	2.30094	1.54796	low
hsa-miR-323b-3p_R-1	CCCAATACACGGTCGACCTCT	up	1.63306	0.707581	0.563166	28.0655	45.8327	middle
hsa-miR-6513-5p	TTTGGGATTGACGCCACATGTCT	up	1.61211	0.688947	0.564937	1.42114	2.29102	low
hsa-miR-605-3p	AGAAGGCACTATGAGATTTAGA	down	0.348584	-1.52042	0.565611	2.18918	0.763113	middle
PC-3p-180217_25	ATAAAGAAATTGCATGTGGG	down	0.642817	-0.63752	0.56598	5.87148	3.77429	middle
hsa-miR-432-5p	TCTTGGAGTAGGTCATTGGGTGG	down	0.480099	-1.0586	0.566625	80.1858	38.4972	middle
PC-5p-26928_221	GGGAGTTTGGCTGGGGCG	down	0.686509	-0.542649	0.567394	88.4884	60.7481	middle
hsa-miR-11400_1ss20TC	TCGGCTGTGTATCTCTGTGCC	up	1.47475	0.560468	0.568113	23.4966	34.6516	middle
hsa-miR-154-3p	AATCATACACGGTTGACCTATT	up	1.98242	0.987262	0.569624	8.69516	17.2375	middle
hsa-miR-24-2-5p_L+1R+1	GTGCCTACTGAGCTGAAACACAGT	up	1.24314	0.313986	0.569715	76.6664	95.3069	middle
PC-3p-236838_17	AGTGAAAAGTGCTTGAAAT	down	0.371175	-1.42983	0.570307	3.12714	1.16072	middle
hsa-let-7a-5p	TGAGGTAGTAGGTTGTATAGTT	down	0.890046	-0.168048	0.570442	6087.16	5417.85	high
PC-3p-159881_30	TTTGTCTTTTGGTCTAAACT	down	0.356966	-1.48614	0.571196	10.7216	3.82726	middle
hsa-miR-199b-5p_R-1	CCCAGTGTTTAGACTATCTGTT	up	1.30231	0.381077	0.576529	107.346	139.798	middle
hsa-miR-223-5p_R+1	CGTGTATTTGACAAGCTGAGTTG	up	1.32436	0.405296	0.577581	82.2779	108.966	middle
hsa-miR-629-5p_R+1	TGGGTTTACGTTGGGAGAACTT	up	1.15903	0.212915	0.577884	71.4185	82.776	middle
hsa-miR-5193_L-2R+2	CTCCTCTACCTCATCCCAGTTT	down	0.372186	-1.4259	0.581427	1.28147	0.476945	low
hsa-miR-141-3p_R+1	TAACACTGTCTGGTAAAGATGGC	down	0.640761	-0.642141	0.581885	11.7843	7.55092	middle
hsa-miR-29b-1-5p_R-1	GCTGGTTTCATATGGTGGTTTAG	up	2.66378	1.41347	0.583606	0.320368	0.853388	low
hsa-miR-19b-1-5p	AGTTTTGCAGGTTTGCATCCAGC	up	1.90134	0.927013	0.584904	0.640736	1.21825	low
hsa-miR-1285-3p_R+2	TCTGGGCAACAAAGTGAGACCTTT	down	0.601011	-0.734536	0.584918	3.97182	2.38711	middle
hsa-miR-450b-5p_R-1	TTTTGCAATATGTTCCTGAAT	up	1.34083	0.423128	0.586137	20.4087	27.3647	middle
hsa-miR-17-3p_R+1	ACTGCAGTGAAGGCACTTGTAGA	up	1.20724	0.271714	0.587324	60.7312	73.3172	middle
PC-3p-323860_11	GCAAAACTGCAATAACCTTTG	down	0.382209	-1.38757	0.588223	0.744259	0.284463	low
hsa-miR-551b-3p_R+1	GCGACCCATACTTGGTTTCAGT	down	0.588185	-0.765659	0.588589	2.32721	1.36883	low
hsa-miR-7976_R+3	TGCCCTGAGACTTTTGCTCTAA	up	1.32858	0.409885	0.589127	10.4658	13.9046	middle
hsa-miR-191-3p_L-1R+1	CTGCGCTTGGATTTCGTCCCCT	down	0.477234	-1.06723	0.589518	5.38959	2.5721	middle
PC-5p-273816_14	TCCGGCTGATACTGTCTTC	down	0.384345	-1.37953	0.589678	2.23367	0.858502	middle
hsa-miR-9-3p	ATAAAGCTAGATAACCGAAAGT	down	0.402096	-1.31439	0.590775	0.836516	0.33636	low
hsa-miR-93-5p	CAAAGTGCTGTTCGTGCAGGTAG	down	0.894446	-0.160934	0.593735	2232.06	1996.46	high
hsa-miR-150-5p	TCTCCCAACCCTTGTACCAGTG	up	1.17127	0.228076	0.593981	4617.35	5408.17	high
hsa-miR-330-5p_R+1	TCTCTGGGCCTGTGTCTTAGGCT	down	0.5586	-0.840112	0.594688	7.46545	4.1702	middle
hsa-miR-19b-3p	TGTGCAAATCCATGCAAAACTGA	down	0.920116	-0.120113	0.595148	1811.16	1666.48	high
hsa-miR-7977_1ss6AG	TTCCCGGCCAACGCACCA	up	1.51863	0.602771	0.595808	15.8936	24.1366	middle
hsa-miR-96-5p_R-2	TTTGGCACTAGCACATTTTTG	up	1.15244	0.204692	0.596076	611.128	704.288	high
PC-5p-179640_25	GGGAATGTGGTGAAATGGT	down	0.394349	-1.34246	0.596514	9.70526	3.82726	middle
PC-3p-121958_43	TTAAGTTCATCTAGAACCT	down	0.560474	-0.835281	0.597937	10.9553	6.14014	middle
hsa-miR-665_R+2	ACCAGGAGGCTGAGGCCCCTCT	down	0.396998	-1.3328	0.598332	3.84441	1.52623	middle
hsa-miR-181c-3p_L-1R+1	ACCATCGACCGTTGAGTGGACC	down	0.602587	-0.730759	0.598416	23.2154	13.9893	middle
hsa-mir-564-p3_1ss14GT	TGGCCGAGAGGCCTGGGC	down	0.547779	-0.868334	0.598583	8.47277	4.6412	middle
hsa-miR-582-5p	TTACAGTTGTTCAACCAGTTACT	up	1.50421	0.589004	0.598875	13.3254	20.0442	middle
PC-5p-169134_27	GAGTGAAGCGGGATGAGCT	down	0.565455	-0.822517	0.598999	5.81463	3.28791	middle
PC-5p-116227_46	TGACACCTGAAATCAAGCA	up	1.63226	0.706869	0.600004	6.25616	10.2117	middle
hsa-miR-143-3p_R+1	TGAGATGAAGCACTGTAGCTCT	up	1.3083	0.387695	0.600044	860.518	1125.82	high
hsa-miR-451a_R+1	AAACCGTTACCATTACTGAGTTT	down	0.862056	-0.214146	0.601104	73799.6	63619.4	high
hsa-miR-431-5p	TGTCTTGCAGGCCGTCATGCA	down	0.449694	-1.15298	0.60229	18.0597	8.12136	middle
hsa-miR-493-5p	TTGTACATGGTAGGCTTTCATT	down	0.5855	-0.77226	0.606016	158.676	92.9049	middle
hsa-miR-301b-3p	CAGTGCAATGATATTGTCAAAGC	down	0.556468	-0.84563	0.606249	3.04023	1.69179	middle
PC-5p-223079_18	CCCACCAGGAGCCTGGCACTGT	down	0.409812	-1.28697	0.607161	0.69413	0.284463	low
hsa-miR-877-5p_R+4	GTAGAGGAGATGGCGCAGGGGACA	down	0.5962	-0.746131	0.607363	9.24146	5.50976	middle
hsa-miR-656-3p	AATATTATACAGTCAACCTCT	up	1.5966	0.675007	0.608012	21.3768	34.1302	middle
hsa-miR-654-3p_R-2	TATGTCTGCTGACCATCACC	down	0.549998	-0.862502	0.608215	103.138	56.7256	middle
hsa-miR-195-5p_R+1	TAGCAGCACAGAAATATTGGCA	up	1.12249	0.166703	0.608642	41.7917	46.9108	middle
hsa-miR-889-3p	TTAATATCGGACAACCATTGT	down	0.581223	-0.782835	0.608705	18.4437	10.7199	middle
hsa-miR-127-3p	TCGGATCCGTCTGAGCTTGGCT	down	0.575391	-0.797386	0.610057	184.311	106.051	middle
hsa-miR-181a-2-3p	ACCACTGACCGTTGACTGTACC	up	1.3549	0.438185	0.610412	21.8636	29.6229	middle
hsa-miR-33a-5p_R-1	GTGCATTGTAGTTGCATTGC	up	1.44368	0.529747	0.610731	17.5629	25.3551	middle
PC-3p-260670_15	TGGAAAAGAGCAGCTGAGAGG	down	0.558298	-0.840892	0.610788	7.0863	3.95627	middle
hsa-miR-1185-5p_R+1	AGAGGATACCCTTTGTATGTTC	down	0.432144	-1.21042	0.611429	1.38826	0.599929	low
hsa-miR-1273c_R+1	GGCGACAAAACGAGACCCTGTCA	up	2.38199	1.25217	0.614098	0.320368	0.763113	low
hsa-miR-24-1-5p_L+2R-2	GGTGCCTACTGAGCTGATATCA	up	1.41891	0.504779	0.614105	4.26504	6.05169	middle
PC-5p-385197_8	GATCTTGAACGAGGAATT	down	0.420914	-1.2484	0.614861	3.57388	1.5043	middle
PC-3p-84008_68	AGACTCTTCTCCCGCTCCA	down	0.64285	-0.637446	0.616521	19.6784	12.6502	middle
hsa-let-7g-5p	TGAGGTAGTAGTTTGTACAGTT	down	0.926595	-0.10999	0.616567	21359.5	19791.6	high
PC-3p-147187_33	ATAGAATAGGACTTTGGTT	down	0.548853	-0.865509	0.61813	9.1021	4.99571	middle
hsa-miR-374b-3p	CTTAGCAGGTTGTATTATCATT	down	0.727377	-0.459225	0.618817	22.413	16.3027	middle
hsa-miR-1249-3p	ACGCCCTTCCCCCCCTTCTTCA	down	0.589597	-0.762199	0.619081	11.1809	6.59224	middle
PC-5p-78004_75	GGGATTGTGGCTTGGTTCCT	up	1.67617	0.745172	0.619146	13.9546	23.3903	middle
PC-3p-264297_14	TTACTCTAACCTTTTTGGA	down	0.427222	-1.22694	0.619254	1.11639	0.476945	low
hsa-miR-337-3p_L-1	TCCTATATGATGCCTTTCTTC	down	0.605237	-0.724428	0.619325	22.7967	13.7974	middle
hsa-let-7f-5p	TGAGGTAGTAGATTGTATAGTT	down	0.869225	-0.202199	0.621266	8408.03	7308.47	high
PC-5p-21626_269	ACTCTGTCTCTGAACACCA	down	0.71291	-0.488209	0.621763	48.1157	34.3022	middle
PC-3p-284829_13	TTGACACAGACGGGAAGTGCG	up	1.73062	0.791292	0.621889	2.55404	4.42008	middle
hsa-miR-1908-5p	CGGCGGGGACGGCGATTGGTC	down	0.523918	-0.932587	0.624588	27.113	14.205	middle
hsa-miR-27a-3p_R-1	TTCACAGTGGCTAAGTTCCG	up	1.0598	0.0837926	0.625446	5268.92	5584	high
hsa-miR-1277-5p_L-3	TATATATATATATGTACGTAT	up	1.20494	0.268967	0.626223	103.606	124.84	middle
PC-5p-16516_335	AACTAACAAGGATTCCCTC	down	0.772295	-0.372776	0.627753	52.4468	40.5044	middle
hsa-miR-32-3p_R-1	CAATTTAGTGTGTGTGATATT	up	1.43365	0.519696	0.628712	4.53364	6.49967	middle
hsa-miR-30a-3p	CTTTCAGTCGGATGTTTGCAGC	up	1.22957	0.298152	0.629109	47.0575	57.8604	middle
hsa-miR-1285-3p_R+1	TCTGGGCAACAAAGTGAGACCTA	down	0.673572	-0.570096	0.629572	2.103	1.41652	low
PC-5p-326448_11	TGAGGTTCGGGAAGTATCA	down	0.510867	-0.968982	0.62996	4.08638	2.08759	middle
PC-3p-7094_636	GTGGTTCCGGGCCAAGTCT	up	1.99492	0.996327	0.631527	68.4694	136.591	middle
hsa-miR-433-5p	TACGGTGAGCCTGTCATTATTC	down	0.446623	-1.16287	0.632847	1.28147	0.572335	low
hsa-miR-655-3p	ATAATACATGGTTAACCTCTTT	down	0.607148	-0.719879	0.634493	15.5733	9.45529	middle
hsa-miR-125b-5p	TCCCTGAGACCCTAACTTGTGA	up	1.10926	0.149601	0.635034	236.167	261.971	middle
hsa-miR-628-3p_R+2	TCTAGTAAGAGTGGCAGTCGAAG	up	1.39345	0.478666	0.636146	22.9303	31.9523	middle
PC-3p-54636_111	AAATCCTTTGTAGATGACT	down	0.718161	-0.477621	0.636436	18.2367	13.0969	middle
hsa-miR-664b-3p	TTCATTTGCCTCCCAGCCTACA	up	1.74519	0.80338	0.636998	1.0145	1.77049	low
hsa-mir-548ax-p3	CAAAAACCGTAATTACTTTTGT	up	1.40511	0.49068	0.637706	18.6496	26.2047	middle
PC-3p-21944_265	TACATACTCAAAAACAACCTCG	down	0.718684	-0.47657	0.63775	44.6516	32.0904	middle
PC-5p-75394_78	AATTGTCAGTTATGCTCAT	down	0.524698	-0.93044	0.637772	16.5777	8.69831	middle
hsa-miR-323a-3p_L+1	GCACATTACACGGTCGACCTCT	down	0.543132	-0.880626	0.638767	37.9251	20.5983	middle
hsa-miR-320c_1ss20TA	AAAAGCTGGGTTGAGAGGGA	down	0.781761	-0.355201	0.638848	3.61377	2.82511	low
hsa-miR-21-5p_R+1	TAGCTTATCAGACTGATGTTGAC	up	1.19229	0.253736	0.639601	37899.4	45187.1	high
hsa-miR-126-5p	CATTATTACTTTTGGTACGCG	down	0.917825	-0.123709	0.64104	6415.68	5888.47	high
PC-3p-103316_53	TCTTGTAAACGAGAAGAGC	up	1.47286	0.558617	0.642707	4.58655	6.75534	middle
PC-3p-81200_71	GAGGGCGTGAAGGTTGTTG	down	0.638992	-0.64613	0.646387	14.1969	9.07172	middle
hsa-miR-548ap-5p_R+3	AAAAGTAATTGCGGTCTTTGGT	up	1.46894	0.554771	0.64653	14.1085	20.7245	middle
hsa-miR-27b-3p	TTCACAGTGGCTAAGTTCTGC	down	0.84053	-0.250628	0.648351	5296.32	4451.72	high
hsa-miR-654-5p	TGGTGGGCCGCAGAACATGTGC	down	0.485469	-1.04255	0.649099	7.84901	3.81045	middle
hsa-miR-2355-3p_L-2R+2	TGTCCTTGCTGTTTGGAGATAA	down	0.584324	-0.775159	0.650022	19.0316	11.1206	middle
hsa-miR-6721-5p_R+1	TGGGCAGGGGCTTATTGTAGGAGT	down	0.684533	-0.546809	0.651063	5.49189	3.75938	middle
hsa-miR-379-5p	TGGTAGACTATGGAACGTAGG	down	0.641035	-0.641525	0.651518	72.3031	46.3488	middle
hsa-miR-500b-5p_L+1R+3	TAATCCTTGCTACCTGGGTGAG	up	1.52966	0.613207	0.652947	1.18785	1.81701	low
hsa-miR-10399-5p_R+1	AATTACAGATTGTCTCAGAGAA	up	1.42498	0.510937	0.653081	3.1265	4.45518	middle
hsa-miR-23b-3p_R+1	ATCACATTGCCAGGGATTACCACT	down	0.761743	-0.392625	0.654382	1925.92	1467.05	high
hsa-miR-627-5p_1ss2TG	GGGAGTCTCTAAGAAAAGAGGA	down	0.47948	-1.06046	0.656091	1.06789	0.512033	low
hsa-miR-574-3p	CACGCTCATGCACACACCCACA	down	0.832827	-0.263911	0.656276	113.32	94.3763	middle
PC-3p-52144_117	CTTATTCCGTGATGTAGCA	down	0.785403	-0.348495	0.656812	17.5264	13.7653	middle
PC-5p-99415_56	GCAGAGATGGTCTAGTTGG	down	0.720292	-0.473346	0.657551	9.08629	6.54478	middle
hsa-miR-7-5p	TGGAAGACTAGTGATTTTGTTGTT	down	0.921897	-0.117323	0.657655	220.578	203.35	middle
PC-5p-171328_27	CAGGGTTTGACATGATAC	up	1.55858	0.640237	0.658398	3.83993	5.98485	middle
hsa-miR-29c-5p_R-1	TGACCGATTTCTCCTGGTGTT	up	1.26504	0.339183	0.659084	17.7498	22.4542	middle
hsa-miR-1306-3p_R+4	ACGTTGGCTCTGGTGGTGATGT	up	1.57238	0.652948	0.659146	1.49505	2.35078	low
hsa-miR-3913-5p	TTTGGGACTGATCTTGATGTCT	down	0.484323	-1.04596	0.659537	0.29367	0.142231	low
PC-5p-82170_70	GATTTTGATTTTCAGTGTGA	down	0.684734	-0.546383	0.662894	22.2904	15.263	middle
hsa-miR-4433b-5p_R+1	ATGTCCCACCCCCACTCCTGTT	up	1.42414	0.510093	0.663371	313.724	446.788	high
hsa-miR-550a-3-5p	AGTGCCTGAGGGAGTAAGAG	up	1.41254	0.498294	0.664284	1.44263	2.03777	low
hsa-miR-550a-5p_R-3	AGTGCCTGAGGGAGTAAGAG	up	1.41254	0.498294	0.664284	1.44263	2.03777	low
hsa-miR-548ak_1ss9CT	AAAAGTAATTGCGGTTTTTGA	up	2.03117	1.02231	0.66524	0.144717	0.293945	low
hsa-mir-1273c-p3_1ss23AT	CAGAGTCTCGTTCTGTTGCCCAT	down	0.496248	-1.01087	0.668037	0.961103	0.476945	low
hsa-miR-487a-3p	AATCATACAGGGACATCCAGTT	up	1.60576	0.68326	0.669396	6.30057	10.1172	middle
PC-5p-557613_6	TGAAAGTGGTACGTGAGCT	down	0.501898	-0.994533	0.672072	4.1594	2.08759	middle
PC-3p-296780_12	CTATTGGACATTTTCCTCT	down	0.501898	-0.994533	0.672072	4.1594	2.08759	middle
hsa-mir-1304-p5	CGGTTTGAGGCTACAGTGAGAT	up	1.44195	0.528016	0.673756	1.84829	2.66514	low
hsa-miR-548au-5p_L-1R+1_1ss12CT	AAAGTAATTGTGGTTTTTGCT	up	1.52486	0.608677	0.67855	0.541454	0.825642	low
hsa-miR-548az-5p_L-2R+1_1ss8GA	AAAGTAATTGTGGTTTTTGCT	up	1.52486	0.608677	0.67855	0.541454	0.825642	low
hsa-miR-548ab_L-1_1ss15AT	AAAGTAATTGTGGTTTTTGCT	up	1.52486	0.608677	0.67855	0.541454	0.825642	low
hsa-mir-548ac-p5_1ss6TA	AAAGTAATTGTGGTTTTTGCT	up	1.52486	0.608677	0.67855	0.541454	0.825642	low
hsa-miR-224-3p_L-1R+1	AAATGGTGCCCTAGTGACTACAA	down	0.624458	-0.679323	0.678863	3.07637	1.92106	middle
hsa-miR-126-3p	TCGTACCGTGAGTAATAATGCG	up	1.07694	0.106942	0.679277	31660.7	34096.7	high
PC-5p-94607_59	ATTAGAGGCCTTGGGGATGT	down	0.718288	-0.477366	0.679687	21.7286	15.6074	middle
hsa-miR-381-3p	TATACAAGGGCAAGCTCTCTGT	down	0.660368	-0.598659	0.681711	125.911	83.1478	middle
PC-5p-246516_16	TGGCTAGAGGTGAAATTCT	down	0.532916	-0.908021	0.6822	4.1594	2.21661	middle
hsa-miR-433-3p	ATCATGATGGGCTCCTCGGTGT	down	0.609649	-0.71395	0.682735	36.3923	22.1865	middle
PC-3p-14221_378	AAGCTGACTTGATTTTGAT	down	0.785038	-0.349165	0.683129	57.3737	45.0405	middle
hsa-miR-532-3p	CCTCCCACACCCAAGGCTTGCA	up	1.16245	0.217166	0.685021	14.1693	16.471	middle
hsa-miR-340-3p_R+1	TCCGTCTCAGTTACTTTATAGCC	down	0.775602	-0.366611	0.686129	113.6	88.1086	middle
hsa-miR-1307-5p_R+2	TCGACCGGACCTCGACCGGCTCT	up	1.19833	0.261026	0.686704	188.677	226.097	middle
hsa-miR-324-5p_R+1	CGCATCCCCTAGGGCATTGGTGT	up	1.33795	0.420028	0.687606	20.9118	27.979	middle
PC-5p-303755_12	TTTTCTTCATTGCTAAGGT	down	0.633246	-0.659161	0.688432	6.59331	4.17519	middle
hsa-miR-134-5p	TGTGACTGGTTGACCAGAGGGG	up	1.48039	0.56598	0.688634	63.3218	93.7411	middle
hsa-miR-136-3p_L-1	ATCATCGTCTCAAATGAGTCT	down	0.690533	-0.534218	0.688785	83.0794	57.369	middle
hsa-miR-3177-3p	TGCACGGCACTGGGGACACGT	down	0.525439	-0.928405	0.688919	0.907709	0.476945	low
hsa-miR-4662a-5p	TTAGCCAATTGTCCATCTTTAG	up	1.65661	0.72823	0.691077	1.49505	2.47671	low
hsa-miR-196b-5p_R+1	TAGGTAGTTTCCTGTTGTTGGGA	up	1.27598	0.351606	0.692051	10.9596	13.9842	middle
PC-3p-50184_122	CATGGAATAATAAGATAGG	down	0.772428	-0.372528	0.693083	18.2369	14.0867	middle
PC-3p-67411_89	CAATTAGGTGTAGTCGTAA	down	0.712077	-0.489895	0.693516	16.725	11.9095	middle
hsa-miR-6852-5p	CCCTGGGGTTCTGAGGACATG	down	0.60792	-0.718047	0.698203	12.846	7.80931	middle
hsa-miR-376a-3p_1ss6AG	ATCATGGAGGAAAATCCACGT	down	0.656603	-0.606906	0.700444	9.62094	6.31714	middle
hsa-miR-127-5p_R+1	CTGAAGCTCAGAGGGCTCTGATT	down	0.661807	-0.595517	0.700454	10.6157	7.02557	middle
hsa-miR-598-3p	TACGTCATCGTTGTCATCGTCA	up	1.36161	0.445317	0.703019	5.90465	8.03985	middle
hsa-miR-548a-3p	CAAAACTGGCAATTACTTTTGC	down	0.795158	-0.330686	0.703945	9.52713	7.57558	middle
hsa-miR-2110_R+1	TTGGGGAAACGGCCGCTGAGTGA	down	0.879773	-0.184797	0.704441	48.8864	43.0089	middle
hsa-miR-30c-5p_R+1	TGTAAACATCCTACACTCTCAGCT	down	0.936506	-0.0946397	0.705125	3787.4	3546.93	high
hsa-miR-548ag_R+1_1ss4GA	AAAAGTAATTGTGGTTTCTGCC	up	1.50005	0.585009	0.705511	1.00916	1.51379	low
hsa-miR-374b-5p	ATATAATACAACCTGCTAAGTG	down	0.894816	-0.160337	0.705577	616.456	551.615	middle
hsa-miR-4286_R+1	ACCCCACTCCTGGTACCA	down	0.688999	-0.537427	0.705673	44.9536	30.9729	middle
hsa-miR-33a-3p_R-1	CAATGTTTCCACAGTGCATCA	up	1.56913	0.649968	0.706758	1.60184	2.5135	low
PC-5p-68739_87	GTCCCCGTGGCGGAGCCA	down	0.79429	-0.332262	0.706921	16.5229	13.124	middle
hsa-let-7i-3p	CTGCGCAAGCTACTGCCTTGCT	up	1.09772	0.134514	0.708869	50.9046	55.8791	middle
hsa-miR-1185-1-3p	ATATACAGGGGGAGACTCTTAT	down	0.639186	-0.645692	0.708975	36.5196	23.3428	middle
hsa-miR-628-5p	ATGCTGACATATTTACTAGAGG	up	1.33586	0.417772	0.709947	7.0679	9.44175	middle
PC-3p-293802_12	GTAGTTGGATTTCTGGCAG	down	0.555165	-0.849011	0.710238	2.23367	1.24006	middle
hsa-miR-671-5p_R+1	AGGAAGCCCTGGAGGGGCTGGAGG	up	1.52614	0.609884	0.710995	1.70863	2.6076	low
PC-3p-152335_32	GCTCTGAGAACCCAGGCTCG	down	0.650668	-0.620006	0.711675	10.1599	6.61071	middle
hsa-miR-495-3p	AAACAAACATGGTGCACTTCTT	down	0.685924	-0.54388	0.711971	136.666	93.7425	middle
hsa-miR-486-5p	TCCTGTACTGAGCTGCCCCGAG	down	0.931728	-0.102019	0.713098	8760.21	8162.14	high
hsa-miR-376a-5p_R+1	GTAGATTCTCCTTCTATGAGTAC	up	1.78649	0.83713	0.713531	0.533946	0.953891	low
PC-5p-74094_79	AGTGAAAGTCTTGTAACCA	down	0.743125	-0.428323	0.716681	15.4335	11.469	middle
hsa-miR-145-5p	GTCCAGTTTTCCCAGGAATCCCT	up	1.20359	0.267349	0.717285	86.9233	104.62	middle
hsa-miR-652-3p_R+1	AATGGCGCCACTAGGGTTGTGT	down	0.859858	-0.21783	0.717835	608.768	523.454	high
hsa-miR-590-3p	TAATTTTATGTATAAGCTAGT	up	1.07503	0.10438	0.717999	114.441	123.027	middle
hsa-miR-425-3p_L+1R-1	CATCGGGAATGTCGTGTCCGCC	up	1.27987	0.355997	0.718948	79.9189	102.286	middle
hsa-miR-379-3p_R-1	TATGTAACATGGTCCACTAAC	down	0.656115	-0.607978	0.719944	20.2313	13.2741	middle
PC-3p-69211_86	TGGGGGATACCTTGGCATTC	down	0.73973	-0.43493	0.720091	23.8121	17.6145	middle
hsa-miR-21-3p	CAACACCAGTCGATGGGCTGT	up	1.2348	0.30428	0.722061	47.11	58.1715	middle
hsa-mir-1843-p3_1ss18GA	TCTGATCGTTCCCCTCCATACA	up	1.30006	0.378575	0.723948	15.768	20.4993	middle
hsa-miR-197-3p	TTCACCACCTTCTCCACCCAGC	up	1.15882	0.212654	0.725638	85.473	99.0477	middle
hsa-miR-758-3p_R-1	TTTGTGACCTGGTCCACTAAC	down	0.657949	-0.603952	0.725746	72.5297	47.7209	middle
PC-3p-10257_484	CTTAGTACGAGAGGAACCG	down	0.806558	-0.310151	0.72653	430.733	347.411	middle
hsa-miR-192-5p	CTGACCTATGAATTGACAGCC	up	1.05807	0.0814373	0.729064	507.842	537.334	middle
PC-5p-71182_83	GACGAAGCAGAAGTGAGAA	down	0.745152	-0.424394	0.729409	31.8777	23.7537	middle
PC-5p-240533_17	GTATTCAGCTGTCAGAGGT	up	1.71252	0.776122	0.730857	2.16978	3.71579	middle
hsa-miR-299-5p	TGGTTTACCGTCCCACATACAT	down	0.650809	-0.619694	0.732154	4.30445	2.80137	middle
hsa-miR-4742-5p	TCAGGCAAAGGGATATTTACAGA	up	1.70482	0.769617	0.732746	0.533946	0.910281	low
PC-5p-75280_78	AATAATAGAATAGGACGT	down	0.793026	-0.334561	0.732875	34.7755	27.5779	middle
hsa-miR-660-5p_R+1	TACCCATTGCATATCGGAGTTGT	down	0.962935	-0.0544892	0.733024	141.222	135.988	middle
hsa-let-7b-5p	TGAGGTAGTAGGTTGTGTGGTT	down	0.968912	-0.0455623	0.73304	4310.76	4176.75	high
hsa-miR-543_R+1	AAACATTCGCGGTGCACTTCTTT	down	0.693203	-0.52865	0.733172	134.964	93.5573	middle
hsa-miR-504-5p	AGACCCTGGTCTGCACTCTATC	down	0.617402	-0.695718	0.734745	1.60184	0.988978	low
hsa-miR-196b-3p	TCGACAGCACGACACTGCCTTC	down	0.615063	-0.701195	0.73526	3.39412	2.08759	middle
hsa-miR-224-5p_L-1	CAAGTCACTAGTGGTTCCGTTTAG	up	1.32027	0.400838	0.735517	269.418	355.705	high
hsa-miR-4446-3p	CAGGGCTGGCAGTGACATGGGT	down	0.681756	-0.552672	0.736081	8.34192	5.68716	middle
hsa-miR-544a_1ss22CT	ATTCTGCATTTTTAGCAAGTTT	down	0.59195	-0.756452	0.736592	0.480552	0.284463	low
PC-3p-10181_486	ATTTTGATTTTCAGTGTGAAT	down	0.783105	-0.352722	0.73842	76.8067	60.1478	middle
hsa-miR-3120-3p_R+1	CACAGCAAGTGTAGACAGGCAT	down	0.732661	-0.448782	0.738774	9.98899	7.31854	middle
hsa-miR-2277-5p_R-1	AGCGCGGGCTGAGCGCTGCCAGT	down	0.717711	-0.478524	0.738777	2.14977	1.54292	low
hsa-let-7g-3p_R+1	CTGTACAGGCCACTGCCTTGCT	down	0.595497	-0.747833	0.739128	0.800919	0.476945	low
hsa-mir-1256-p3	CTAAAGAGAAGTCAATGCATGA	down	0.595497	-0.747833	0.739128	0.961103	0.572335	low
hsa-miR-618	AAACTCTACTTGTCCTTCTGAGT	up	1.61277	0.689545	0.739952	1.06463	1.717	low
hsa-miR-301a-3p	CAGTGCAATAGTATTGTCAAAGC	down	0.889544	-0.168863	0.740391	48.536	43.1749	middle
hsa-miR-378a-5p	CTCCTGACTCCAGGTCCTGTGT	up	1.29935	0.377792	0.740966	2.36335	3.07083	low
hsa-mir-2110-p3	CACCGCGGTCTTTTCCTCCCACT	down	0.725325	-0.463301	0.742183	2.02573	1.46931	low
hsa-miR-194-5p	TGTAACAGCAACTCCATGTGGA	down	0.940983	-0.0877588	0.742619	238.806	224.713	middle
PC-3p-284217_13	CTTAGAAGACTGAAGTGGA	down	0.628728	-0.669493	0.742745	3.44751	2.16755	middle
PC-5p-50159_122	ACCGCTTGGGAAGTCTGTG	down	0.616653	-0.697469	0.743649	99.8682	61.584	middle
PC-5p-320594_11	AAGGGTTTGATTCTGGCTC	down	0.602278	-0.731498	0.743971	3.46616	2.08759	middle
PC-5p-255520_15	CAGGTGAACCTTCTTGATA	up	1.65502	0.726851	0.745357	3.57388	5.91485	middle
hsa-miR-27b-5p_R+1	AGAGCTTAGCTGATTGGTGAACA	up	1.33219	0.413803	0.748711	9.85585	13.1299	middle
hsa-miR-337-5p_R-1	GAACGGCTTCATACAGGAGT	down	0.611168	-0.710358	0.750311	2.029	1.24006	middle
PC-5p-32137_188	TTTGAAGTGAGAGGTGTCA	down	0.832443	-0.264577	0.750461	70.58	58.7538	middle
PC-5p-52432_116	CAATTGGACATTTTACTCT	down	0.827715	-0.272793	0.751086	17.6218	14.5858	middle
hsa-miR-548av-5p_R+4	AAAAGTACTTGCGGATTTTGCT	down	0.782312	-0.354185	0.751226	12.5635	9.82861	middle
hsa-miR-30d-3p	CTTTCAGTCAGATGTTTGCTGC	down	0.752016	-0.411164	0.751434	14.0859	10.5928	middle
hsa-miR-10a-5p_R-1	TACCCTGTAGATCCGAATTTGT	down	0.931249	-0.102761	0.751465	1701.13	1584.17	high
hsa-let-7f-2-3p_1ss22CT	CTATACAGTCTACTGTCTTTCT	up	1.15303	0.205436	0.752635	43.3183	49.9475	middle
hsa-miR-331-3p_R+1	GCCCCTGGGCCTATCCTAGAAT	up	1.17961	0.238308	0.753825	75.7867	89.3987	middle
PC-5p-25855_229	TTAGACCTCAGATGAAGTG	down	0.799239	-0.323301	0.75398	64.7184	51.7255	middle
hsa-miR-1343-3p	CTCCTGGGGCCCGCACTCTCGC	down	0.634488	-0.656336	0.75503	2.40276	1.52452	middle
hsa-miR-99a-5p_R-1	AACCCGTAGATCCGATCTTGT	up	1.08757	0.121106	0.756868	870.253	946.46	high
PC-5p-132508_38	TCTTAGAGGGACGTTCATTC	up	1.47331	0.559063	0.758858	9.87622	14.5508	middle
PC-3p-417524_7	CCGAGAGGCCTGGGAAATC	up	1.60354	0.681259	0.759171	2.60373	4.17519	middle
hsa-miR-200b-3p	TAATACTGCCTGGTAATGATGA	down	0.86674	-0.20633	0.759468	41.2859	35.7842	middle
hsa-miR-26a-5p	TTCAAGTAATCCAGGATAGGCT	up	1.12332	0.167767	0.761053	20383.1	22896.7	high
hsa-miR-652-5p_L+1R-1	ACAACCCTAGGAGAGGGTGCCATTC	down	0.739388	-0.435596	0.76114	7.62727	5.63951	middle
hsa-miR-421	ATCAACAGACATTAATTGGGCGC	down	0.771789	-0.373721	0.761479	55.8818	43.129	middle
hsa-miR-576-3p_R+1	AAGATGTGGAAAAATTGGAATCC	up	1.33704	0.419047	0.762138	5.05197	6.75471	middle
PC-5p-30202_199	CCAAGTGTTGGATTGTTCA	up	1.21769	0.284141	0.763464	30.291	36.885	middle
hsa-miR-30b-5p	TGTAAACATCCTACACTCAGCT	down	0.935884	-0.0955988	0.76414	2189.67	2049.27	high
hsa-miR-1185-2-3p	ATATACAGGGGGAGACTCTCAT	down	0.632716	-0.66037	0.765625	2.56294	1.62161	middle
hsa-miR-339-3p	TGAGCGCCTCGACGACAGAGCCG	up	1.14547	0.195946	0.76882	94.8399	108.637	middle
PC-3p-221949_19	GAAATAATCTATTCTGAGGCTTT	down	0.638033	-0.648297	0.76939	0.747525	0.476945	low
PC-5p-103354_53	AACTTCCAAGAAAAGCTC	down	0.788314	-0.343158	0.770481	20.0745	15.825	middle
hsa-miR-493-3p	TGAAGGTCTACTGTGTGCCAGG	down	0.716485	-0.480992	0.770972	17.7328	12.7053	middle
PC-5p-295849_12	TTAGTGGCTCCCTCTGCCTGCA	down	0.642111	-0.639104	0.772275	0.620216	0.398248	low
hsa-miR-452-5p_R+2	AACTGTTTGCAGAGGAAACTGAGA	up	1.25799	0.331121	0.772631	23.8298	29.9777	middle
hsa-miR-1306-5p	CCACCTCCCCTGCAAACGTCCA	down	0.676952	-0.562875	0.776725	1.60184	1.08437	low
hsa-miR-584-5p_R-1	TTATGGTTTGCCTGGGACTGA	down	0.843934	-0.244798	0.781334	392.197	330.988	middle
hsa-miR-769-5p	TGAGACCTCTGGGTTCTGAGCT	up	1.12266	0.166915	0.781437	73.1382	82.109	middle
PC-3p-161667_29	CTGTTAAATCTTGAGGCTC	down	0.679442	-0.557578	0.783346	6.93233	4.71011	middle
hsa-miR-339-5p	TCCCTGTCCTCCAGGAGCTCACG	up	1.15845	0.212198	0.78341	1523.95	1765.43	high
hsa-miR-150-3p_R-1	CTGGTACAGGCCTGGGGGACA	up	1.08408	0.116477	0.784288	24.3646	26.4133	middle
hsa-miR-338-3p_R+1	TCCAGCATCAGTGATTTTGTTGA	down	0.86048	-0.216787	0.784654	29.128	25.0641	middle
hsa-miR-483-3p_R+1	TCACTCCTCTCCTCCCGTCTTC	up	1.40645	0.492059	0.78566	3.46616	4.87499	middle
PC-3p-71216_83	TCCTGGGCCGCACGCGCG	down	0.808295	-0.307047	0.785852	30.8021	24.8972	middle
hsa-miR-545-3p_R+1	TCAGCAAACATTTATTGTGTGCC	up	1.32733	0.408528	0.787461	1.65034	2.19054	low
hsa-miR-425-5p	AATGACACGATCACTCCCGTTGA	down	0.884665	-0.176798	0.787539	1397.41	1236.24	high
PC-3p-290252_13	AGAGTCGGTTTGTTTGGGA	up	1.5057	0.59043	0.78779	3.46616	5.21899	middle
hsa-miR-3158-3p	AAGGGCTTCCTCTCTGCAGGAC	up	1.30784	0.387187	0.789321	0.639103	0.835844	low
hsa-let-7d-5p	AGAGGTAGTAGGTTGCATAGTT	down	0.900892	-0.150573	0.789872	4656.62	4195.11	high
hsa-miR-146a-5p	TGAGAACTGAATTCCATGGGTT	up	1.13919	0.18801	0.789899	8338.39	9499.02	high
PC-3p-320636_11	CGAGTCCCATCAGCCACCCCA	down	0.668141	-0.581775	0.790591	2.60373	1.73966	middle
hsa-miR-378i_R+1_1ss9AT	ACTGGACTTGGAGTCAGAAGGT	up	1.23725	0.307135	0.792539	2.52354	3.12224	low
hsa-miR-410-3p	AATATAACACAGATGGCCTGT	down	0.815744	-0.293812	0.792757	52.9169	43.1666	middle
hsa-miR-487a-5p	GTGGTTATCCCTGCTGTGTTCG	up	1.38142	0.466154	0.796422	2.08239	2.87666	middle
PC-3p-52768_116	CCTGGATTCATGCTGTCCA	up	1.24165	0.312262	0.797063	15.4213	19.1479	middle
hsa-miR-487b-3p	AATCGTACAGGGTCATCCACTT	down	0.780664	-0.357226	0.797525	107.588	83.9899	middle
PC-5p-143490_34	TAGGTGAAATAGTTGGAAT	up	1.23395	0.303283	0.798565	4.29701	5.30229	middle
PC-5p-38609_158	GCGGGAAGAGCTCAGGATG	up	1.16232	0.217004	0.801421	32.7437	38.0586	middle
hsa-miR-1290_R-1_1ss13TG	TGGATTTTTGGAGCAGGG	down	0.684293	-0.547314	0.801867	1.79863	1.23079	low
hsa-miR-185-3p_R-1	AGGGGCTGGCTTTCCTCTGGT	down	0.887201	-0.172668	0.802531	75.5637	67.0402	middle
hsa-let-7i-5p	TGAGGTAGTAGTTTGTGCTGTT	down	0.932245	-0.101219	0.807427	11518	10737.6	high
hsa-miR-362-5p_R-1	AATCCTTGGAACCTAGGTGTGAG	down	0.959944	-0.0589776	0.807457	70.845	68.0072	middle
PC-3p-177222_26	ATGCCCATCATTTACTGTG	down	0.772394	-0.372592	0.807501	9.61273	7.42481	middle
PC-5p-296340_12	GTGCAGAAACAATCAGGAG	down	0.739848	-0.4347	0.808602	2.55404	1.8896	middle
hsa-miR-181b-5p	AACATTCATTGCTGTCGGTGGGT	up	1.0723	0.100702	0.808676	47.9253	51.39	middle
hsa-miR-494-3p_R+1	TGAAACATACACGGGAAACCTCT	down	0.80913	-0.305557	0.809133	275.624	223.016	middle
hsa-miR-204-5p	TTCCCTTTGTCATCCTATGCCT	down	0.878889	-0.186248	0.810239	19.1284	16.8117	middle
hsa-miR-450a-5p	TTTTGCGATGTGTTCCTAATAT	up	1.07408	0.103105	0.810433	69.1736	74.2982	middle
PC-5p-113093_47	GTGGAGTCTCGTTATGTCT	down	0.743583	-0.427433	0.810765	21.4172	15.9255	middle
hsa-miR-6516-5p_R-1	TTTGCAGTAACAGGTGTGAGC	down	0.721557	-0.470816	0.81275	2.34936	1.6952	middle
hsa-miR-23b-5p	TGGGTTCCTGGCATGCTGATTT	down	0.738942	-0.436468	0.813294	3.9512	2.91971	middle
PC-5p-117690_45	AGGTTAGCAGCCTCTGGTC	down	0.728025	-0.45794	0.814909	8.04123	5.85422	middle
hsa-miR-1296-5p	TTAGGGCCCTGGCTCCATCTCC	up	1.15136	0.203341	0.816771	32.0982	36.9566	middle
PC-3p-212315_20	AGACTTGTCTGTGAAGATG	down	0.742905	-0.42875	0.817589	5.15174	3.82726	middle
hsa-miR-328-3p	CTGGCCCTCTCTGCCCTTCCGT	up	1.11744	0.160197	0.817818	213.141	238.173	middle
hsa-miR-539-3p	ATCATACAAGGACAATTTCTTT	down	0.796401	-0.328433	0.817924	28.6554	22.8212	middle
hsa-miR-181c-5p_R+2	AACATTCAACCTGTCGGTGAGTTT	up	1.16705	0.222863	0.819219	35.3439	41.2481	middle
PC-3p-65893_91	TGTGATTCTAGTGCCAGAGT	down	0.860733	-0.216363	0.820372	13.6285	11.7305	middle
PC-3p-108741_50	GTGAAAATCCCGTCTCTGA	down	0.809353	-0.30516	0.82041	15.7814	12.7727	middle
hsa-miR-215-5p_L-1R+2_1ss20AC	TGACCTATGAATTGACAGCCAA	up	1.21994	0.286809	0.821099	2.06056	2.51376	low
hsa-miR-130b-3p	CAGTGCAATGATGAAAGGGCAT	up	1.13863	0.187305	0.82537	16.321	18.5836	middle
hsa-miR-335-5p	TCAAGAGCAATAACGAAAAATGT	up	1.09486	0.130747	0.825797	769.272	842.246	high
hsa-miR-93-3p_R+1	ACTGCTGAGCTAGCACTTCCCGA	down	0.917026	-0.124966	0.825967	80.6119	73.9231	middle
PC-3p-55687_109	CAGTTCAATGGTGTTCAGCAGA	up	1.23314	0.302334	0.82814	3.55692	4.38617	middle
PC-3p-353031_10	ATCCTGGGTGTTGTTCTTC	up	1.36228	0.446025	0.828316	2.55404	3.47932	middle
PC-3p-147552_33	GATTGAAATTGGACTTTA	up	1.29155	0.369108	0.82868	6.70102	8.65473	middle
PC-3p-212958_20	TTCTATTTTGTCTAGTGGGAA	down	0.73959	-0.435201	0.829662	2.23367	1.652	middle
hsa-miR-412-5p	TGGTCGACCAGTTGGAAAGTAAT	up	1.28633	0.363264	0.830425	4.21818	5.42598	middle
PC-5p-177422_26	GTTGACCTTCAGTTTTATG	down	0.753039	-0.409203	0.830518	4.85263	3.65422	middle
hsa-let-7e-5p	TGAGGTAGGAGGTTGTATAGTT	down	0.915902	-0.126735	0.831049	465.277	426.149	high
hsa-miR-485-3p	GTCATACACGGCTCTCCTCTCT	up	1.23582	0.305467	0.831407	37.6343	46.5092	middle
hsa-miR-29b-2-5p_R+1	CTGGTTTCACATGGTGGCTTAGA	up	1.08955	0.123728	0.831714	15.7726	17.1849	middle
hsa-miR-30a-5p_R+2	TGTAAACATCCTCGACTGGAAGCT	up	1.07707	0.107111	0.833282	2118.84	2282.14	high
hsa-miR-365b-3p	TAATGCCCCTAAAAATCCTTAT	down	0.933551	-0.0991988	0.833464	15.3563	14.3359	middle
hsa-miR-2355-5p_R+1	ATCCCCAGATACAATGGACAAT	down	0.829724	-0.269297	0.833739	22.0431	18.2897	middle
PC-5p-148565_33	GGTGCTGGAAGATTAAATGA	up	1.28127	0.35758	0.835067	4.1594	5.32933	middle
hsa-miR-30b-3p	CTGGGAGGTGGATGTTTACTTC	down	0.800579	-0.320883	0.83554	6.4386	5.15461	middle
hsa-miR-7-1-3p	CAACAAATCACAGTCTGCCATA	up	1.13877	0.187472	0.835921	13.1708	14.9985	middle
hsa-miR-20a-3p_R+1	ACTGCATTATGAGCACTTAAAGT	down	0.871349	-0.198677	0.83714	25.2817	22.0292	middle
hsa-miR-23a-3p_R+1	ATCACATTGCCAGGGATTTCCA	down	0.920824	-0.119003	0.840298	6971.29	6419.33	high
hsa-miR-25-5p_R+2	AGGCGGAGACTTGGGCAATTGCT	up	1.16746	0.223369	0.840554	4.74396	5.53837	middle
hsa-miR-320c_R+2_1ss20TA	AAAAGCTGGGTTGAGAGGGAAA	up	1.07596	0.105624	0.840576	6.92066	7.44635	middle
PC-5p-242515_16	TTTTGTTTGGAGAGTTTGA	down	0.762448	-0.391289	0.842468	2.43675	1.8579	middle
PC-3p-133288_38	CTTTTATGAAATTTGTAGG	down	0.769898	-0.37726	0.842995	12.7773	9.83722	middle
hsa-miR-500a-3p_L+1R-2	AATGCACCTGGGCAAGGATTC	up	1.06799	0.0948926	0.843237	45.7305	48.8395	middle
hsa-miR-548o-5p	AAAAGTAATTGCGGTTTTTGCC	down	0.852071	-0.230955	0.843918	2.24294	1.91115	low
hsa-miR-185-5p	TGGAGAGAAAGGCAGTTCCTGA	down	0.963691	-0.0533581	0.844904	11782.2	11354.4	high
hsa-miR-664a-5p_R-2	ACTGGCTAGGGAAAATGATTGG	down	0.867949	-0.204318	0.848837	22.993	19.9568	middle
hsa-miR-411-5p	TAGTAGACCGTATAGCGTACG	down	0.816999	-0.291594	0.849654	44.5551	36.4014	middle
hsa-miR-382-3p_R+1	AATCATTCACGGACAACACTTT	up	1.19333	0.254995	0.849785	24.2673	28.9589	middle
PC-5p-184310_24	ATACTTACAAGAAAAGCTC	down	0.819434	-0.287301	0.850031	4.40345	3.60834	middle
PC-5p-305571_12	GGGACGGGCTTCTGGGCT	down	0.756321	-0.402929	0.851096	2.16978	1.64105	middle
hsa-miR-143-5p	GGTGCAGTGCTGCATCTCTGGT	up	1.22968	0.298288	0.851364	7.8581	9.66298	middle
hsa-miR-4326_R+5	TGTTCCTCTGTCTCCCAGACTCTGT	down	0.78914	-0.341648	0.852628	6.72772	5.30911	middle
hsa-miR-1307-3p_R+1	ACTCGGCGTGGCGTCGGTCGTGG	up	1.1158	0.158075	0.85279	128.522	143.404	middle
PC-5p-18955_300	TGAGGAGTCGGGATTGTGG	up	1.1544	0.207142	0.853071	40.2658	46.4828	middle
hsa-miR-223-3p_R+1	TGTCAGTTTGTCAAATACCCCAA	up	1.08499	0.11768	0.853511	15495	16811.9	high
hsa-miR-514a-3p	ATTGACACTTCTGTGAGTAGA	down	0.761079	-0.393882	0.854279	0.186881	0.142231	low
hsa-miR-18b-5p_R-2	TAAGGTGCATCTAGTGCAGTT	down	0.879623	-0.185043	0.854534	9.19612	8.08911	middle
hsa-miR-145-3p_L-2R+1	ATTCCTGGAAATACTGTTCTA	up	1.16337	0.218306	0.854621	11.4118	13.2761	middle
hsa-miR-411-3p_R-1	TATGTAACACGGTCCACTAAC	down	0.808089	-0.307415	0.857683	22.0721	17.8363	middle
hsa-miR-130a-3p	CAGTGCAATGTTAAAAGGGCAT	up	1.07877	0.109389	0.858281	184.45	198.98	middle
hsa-miR-99b-5p	CACCCGTAGAACCGACCTTGCG	up	1.04767	0.0671802	0.858821	943.576	988.553	high
hsa-miR-128-3p	TCACAGTGAACCGGTCTCTTT	down	0.909623	-0.13666	0.860631	417.99	380.213	high
PC-3p-418554_7	TAGGTGGGAGACTATGAAACC	down	0.784726	-0.349738	0.864116	3.46616	2.71999	middle
hsa-miR-182-5p	TTTGGCAATGGTAGAACTCACACT	up	1.04845	0.0682554	0.864574	728.285	763.569	high
hsa-miR-515-5p	TTCTCCAAAAGAAAGCACTTTCTG	up	1.28622	0.363134	0.865172	0.744259	0.957279	low
hsa-miR-199a-3p	ACAGTAGTCTGCACATTGGTTA	down	0.893686	-0.16216	0.865307	2838.92	2537.11	high
PC-3p-320064_11	CTGGGCATGTCTGCAGTCTTG	up	1.2857	0.362555	0.865378	2.23367	2.87184	middle
PC-5p-619184_5	TAGAAGGGCTAGGATTCTA	down	0.778834	-0.360612	0.866071	2.23367	1.73966	middle
hsa-miR-107_R-2	AGCAGCATTGTACAGGGCTAT	up	1.0603	0.0844734	0.866319	523.547	555.117	high
PC-3p-191324_23	AAGCCTCTGTCCCCACCCCAGT	down	0.78159	-0.355515	0.867889	0.854314	0.667724	low
hsa-miR-30c-1-3p	CTGGGAGAGGGTTGTTTACTCC	down	0.839449	-0.252485	0.869076	5.512	4.62705	middle
hsa-miR-3140-3p_R-1	AGCTTTTGGGAATTCAGGTAG	up	1.27607	0.351703	0.869251	0.373762	0.476945	low
hsa-miR-1287-5p_R+1	TGCTGGATCAGTGGTTCGAGTCT	up	1.16717	0.223009	0.869299	5.8874	6.87157	middle
hsa-miR-361-5p	TTATCAGAATCTCCAGGGGTAC	down	0.956378	-0.0643476	0.869382	450.797	431.132	middle
hsa-miR-1271-5p	CTTGGCACCTAGCAAGCACTCA	up	1.08922	0.12329	0.870281	25.8179	28.1212	middle
hsa-miR-1843_R+3	TATGGAGGTCTCTGTCTGGCTTT	down	0.876382	-0.190369	0.870945	15.8008	13.8476	middle
hsa-miR-625-3p	GACTATAGAACTTTCCCCCTCA	up	1.1122	0.15342	0.871477	99.7724	110.967	middle
hsa-miR-589-5p_R-1	TGAGAACCACGTCTGCTCTGA	up	1.06814	0.0951035	0.872963	25.3068	27.0313	middle
hsa-miR-380-3p_R-1	TATGTAATATGGTCCACATCT	up	1.17285	0.230017	0.873747	4.12537	4.83844	middle
hsa-miR-30c-2-3p	CTGGGAGAAGGCTGTTTACTCT	down	0.869246	-0.202163	0.873828	3.14138	2.73063	middle
PC-5p-227131_18	GTTTGTTTGGGAATGCAGA	down	0.80114	-0.319874	0.874256	3.46616	2.77688	middle
hsa-miR-199a-5p	CCCAGTGTTCAGACTACCTGTTC	down	0.893825	-0.161937	0.874501	1579.18	1411.51	high
hsa-miR-423-5p	TGAGGGGCAGAGAGCGAGACTTT	down	0.961395	-0.0567983	0.874507	3969.7	3816.45	high
hsa-miR-146a-3p_L+1R-1_1ss5CG	ACCTGTGAAATTCAGTTCTTCA	up	1.14713	0.198027	0.874977	12.4657	14.2997	middle
PC-5p-260285_15	CCTGACTGTACCTGAAAGGGT	up	1.25997	0.333387	0.875819	0.868302	1.09403	low
hsa-miR-377-3p	ATCACACAAAGGCAACTTTTGT	up	1.14775	0.198808	0.876367	58.0344	66.6089	middle
PC-3p-45367_135	GGGTGCGCTGGGGAACCA	down	0.804449	-0.313927	0.877421	42.9584	34.5579	middle
hsa-miR-4433b-3p_L+1_1ss9GC	ACAGGAGTCGGGGGTGGGACGT	down	0.827915	-0.272445	0.877984	7.62768	6.31507	middle
PC-3p-144483_34	ATAGGGACAGTTGGGGGCAT	up	1.13578	0.183682	0.87934	13.6116	15.4598	middle
hsa-miR-548d-3p	CAAAAACCACAGTTTCTTTTGC	down	0.799133	-0.323492	0.879383	0.213579	0.170678	low
hsa-miR-580-3p	TTGAGAATGATGAATCATTAGG	down	0.799133	-0.323492	0.879383	0.427157	0.341355	low
hsa-miR-330-3p	GCAAAGCACACGGCCTGCAGAGA	up	1.13071	0.17723	0.880468	71.9354	81.3381	middle
hsa-miR-25-3p	CATTGCACTTGTCTCGGTCTGA	down	0.980007	-0.0291359	0.880724	3264.67	3199.4	high
PC-5p-299494_12	CCCACATTTGAATTTCTGT	down	0.801769	-0.318741	0.881098	2.60373	2.08759	middle
hsa-miR-151b_R+2	TCGAGGAGCTCACAGTCTAG	up	1.04345	0.0613609	0.881139	67.3328	70.2583	middle
PC-5p-221851_19	ATCTTTTATGAAATTTGTAG	up	1.22505	0.292837	0.881192	4.1594	5.09546	middle
hsa-miR-1301-3p_R+1	TTGCAGCTGCCTGGGAGTGACTTCT	down	0.908488	-0.13846	0.881551	168.956	153.495	middle
hsa-miR-320a-3p	AAAAGCTGGGTTGAGAGGGCGA	up	1.03026	0.0430125	0.883552	8387.65	8641.49	high
hsa-miR-17-5p	CAAAGTGCTTACAGTGCAGGTAG	down	0.970338	-0.0434402	0.884648	4363.63	4234.2	high
PC-5p-237764_17	CAGGTGTCCTAAGGTCAG	up	1.2164	0.282622	0.885017	4.85263	5.90276	middle
hsa-miR-4454_L-2	ATCCGAGTCACGGCACCA	down	0.831264	-0.266621	0.885453	1.12129	0.932086	low
hsa-miR-98-3p_1ss22CT	CTATACAACTTACTACTTTCCT	up	1.10731	0.147059	0.886756	11.9769	13.2622	middle
hsa-miR-101-3p_R+1	TACAGTACTGTGATAACTGAAG	up	1.02006	0.0286472	0.88746	3592.53	3664.58	high
hsa-miR-326_R+1	CCTCTGGGCCCTTCCTCCAGT	down	0.912552	-0.132021	0.887834	106.675	97.3462	middle
hsa-miR-376b-3p	ATCATAGAGGAAAATCCATGTT	down	0.837865	-0.25521	0.887956	5.76662	4.83165	middle
hsa-miR-191-5p	CAACGGAATCCCAAAAGCAGCTG	down	0.932764	-0.100415	0.888005	13457.3	12552.5	high
hsa-miR-744-3p_R-1	CTGTTGCCACTAACCTCAACC	down	0.838297	-0.254467	0.888565	3.04349	2.55135	middle
hsa-miR-548ae-5p	AAAAGTAATTGTGGTTTTTG	down	0.967175	-0.0481505	0.888889	14.4698	13.9948	middle
hsa-miR-590-5p	GAGCTTATTCATAAAAGTGCAG	up	1.22307	0.290506	0.891339	0.744259	0.910281	low
hsa-miR-22-3p	AAGCTGCCAGTTGAAGAACTGT	up	1.04027	0.0569614	0.892623	5650.53	5878.09	high
hsa-miR-151b_R+4	TCGAGGAGCTCACAGTCTAGTA	down	0.920829	-0.118995	0.893435	5803.94	5344.44	high
PC-3p-87713_65	ATGGAATAATAGAATAGGA	down	0.898959	-0.153672	0.893542	10.6813	9.60203	middle
hsa-miR-484	TCAGGCTCAGTCCCCTCCCGAT	down	0.955613	-0.065501	0.894335	2524.71	2412.65	high
hsa-miR-377-5p	AGAGGTTGCCCTTGGTGAATTC	down	0.859989	-0.21761	0.894664	9.25126	7.95598	middle
hsa-miR-95-3p	TTCAACGGGTATTTATTGAGCA	up	1.06895	0.0961901	0.89536	88.4548	94.5535	middle
hsa-miR-103a-3p	AGCAGCATTGTACAGGGCTATGA	up	1.05632	0.0790504	0.895388	7211.57	7617.74	high
hsa-miR-3173-5p	TGCCCTGCCTGTTTTCTCCTTT	up	1.15382	0.206421	0.896155	1.65197	1.90608	low
hsa-miR-556-5p_R-1	GATGAGCTCATTGTAATATGA	down	0.85143	-0.23204	0.8972	3.68423	3.13686	middle
hsa-miR-1197	TAGGACACATGGTCTACTTCT	down	0.844889	-0.243166	0.898379	5.07249	4.28569	middle
hsa-miR-1304-3p_1ss13CA	TCTCACTGTAGCATCGAACCCC	up	1.1456	0.196105	0.89909	3.55692	4.07481	middle
hsa-miR-324-3p_L-3R+1	ACTGCCCCAGGTGCTGCTGGA	up	1.05282	0.0742554	0.8998	36.2544	38.1693	middle
hsa-miR-766-5p_R+1	AGGAGGAATTGGTGCTGGTCTTT	down	0.90837	-0.138648	0.90236	5.04707	4.58461	middle
hsa-miR-23a-5p	GGGGTTCCTGGGGATGGGATTT	down	0.900554	-0.151115	0.902846	8.67627	7.81345	middle
PC-5p-238237_17	AGCCTGGAAGCTGGAGCCTGCAGT	down	0.853021	-0.229346	0.903737	1.22808	1.04758	low
hsa-miR-548j-3p	CAAAAACTGCATTACTTTTGC	down	0.837418	-0.25598	0.90397	1.70863	1.43084	low
PC-3p-138601_36	TCTGTATGTGCTAGGTGCT	up	1.16346	0.218427	0.905135	4.84111	5.63246	middle
PC-3p-100438_55	GTAATATAGGAGCTGAGA	up	1.08752	0.121036	0.905799	8.34111	9.07109	middle
hsa-mir-548v-p3_1ss6GA	CAAAAACTACAGTTACTTTTGC	down	0.840702	-0.250333	0.906046	1.05899	0.890298	low
hsa-miR-548av-3p_L+2_1ss9GA	CAAAAACTACAGTTACTTTTGC	down	0.840702	-0.250333	0.906046	1.05899	0.890298	low
hsa-mir-548p-p3_1ss9GA	CAAAAACTACAGTTACTTTTGC	down	0.840702	-0.250333	0.906046	1.05899	0.890298	low
hsa-let-7f-1-3p_1ss22CT	CTATACAATCTATTGCCTTCCT	down	0.931299	-0.102684	0.90685	7.62675	7.10279	middle
hsa-miR-34a-5p_R+1	TGGCAGTGTCTTAGCTGGTTGTT	up	1.11026	0.150892	0.909691	3.32282	3.68918	middle
hsa-miR-941	CACCCGGCTGTGTGCACATGTGC	down	0.934998	-0.0969649	0.911575	22.9408	21.4496	middle
hsa-miR-320e_L+1R+3_1ss17AG	AAAAGCTGGGTTGAGAGGGTGA	down	0.852409	-0.230383	0.913403	0.20023	0.170678	low
hsa-miR-3615_R+1	TCTCTCGGCTCCTCGCGGCTCG	down	0.960547	-0.0580722	0.914841	78.3132	75.2235	middle
hsa-miR-24-3p	TGGCTCAGTTCAGCAGGAACAG	up	1.03515	0.0498439	0.914972	1573.19	1628.5	high
PC-3p-334028_10	TGCTAGTGAGACTGTGGGGGA	down	0.87295	-0.196029	0.915043	2.78999	2.43553	middle
hsa-miR-142-3p_R-1	TGTAGTGTTTCCTACTTTATGG	up	1.01775	0.025388	0.915964	3055.81	3110.06	high
hsa-miR-148b-3p	TCAGTGCATCACAGAACTTTGT	up	1.05496	0.0771945	0.91718	3231.58	3409.2	high
hsa-miR-1255b-5p	CGGATGAGCAAAGAAAGTGGTT	up	1.16238	0.217076	0.918328	0.29367	0.341355	low
PC-5p-176832_26	AGCAGGTCTGTGATGCTCCT	down	0.897938	-0.155312	0.919526	13.4362	12.0649	middle
PC-5p-216414_19	CTAGGATTCCTTTAGTAACG	up	1.15523	0.208183	0.921628	5.36082	6.19299	middle
hsa-miR-491-5p	AGTGGGGAACCCTTCCATGAGG	up	1.11021	0.150832	0.924073	5.07249	5.63153	middle
hsa-miR-12136_R+8	GAAAAAGTCATGGAGGCCATGGGGTT	down	0.960334	-0.058392	0.925339	16.5535	15.8969	middle
hsa-miR-382-5p	GAAGTTGTTCGTGGTGGATTCG	down	0.924665	-0.112998	0.926595	91.1129	84.2489	middle
hsa-miR-221-3p	AGCTACATTGTCTGCTGGGTTTC	down	0.945395	-0.0810109	0.927923	9969.91	9425.51	high
hsa-miR-505-3p_L-1R+2	GTCAACACTTGCTGGTTTCCTCT	up	1.03886	0.0550052	0.929088	155.504	161.547	middle
hsa-miR-499a-5p	TTAAGACTTGCAGTGATGTTT	up	1.04819	0.067902	0.933252	9.54355	10.0035	middle
hsa-miR-132-3p	TAACAGTCTACAGCCATGGTCG	up	1.03706	0.0524943	0.933424	10.7328	11.1305	middle
hsa-miR-130b-5p_R+1	ACTCTTTCCCTGTTGCACTACT	up	1.05237	0.0736373	0.93378	47.523	50.0117	middle
hsa-miR-651-5p_R-1	TTTAGGATAAGCTTGACTTTT	down	0.978387	-0.0315234	0.934073	19.9152	19.4848	middle
hsa-miR-548l_R-1	AAAAGTATTTGCGGGTTTTGT	down	0.887926	-0.171489	0.935298	0.320368	0.284463	low
hsa-miR-496	TGAGTATTACATGGCCAATCTC	up	1.09437	0.130107	0.936422	8.16938	8.94036	middle
PC-5p-127962_40	TTATCCAGCTTGTTACTATATG	up	1.09333	0.128734	0.936758	1.70863	1.8681	low
hsa-miR-6515-5p	TTGGAGGGTGTGGAAGACATC	down	0.893246	-0.16287	0.938522	0.533946	0.476945	low
hsa-miR-491-3p	CTTATGCAAGATTCCCTTCTAC	up	1.11656	0.159058	0.93995	0.427157	0.476945	low
hsa-miR-181d-5p_R+1	AACATTCATTGTTGTCGGTGGGTT	down	0.941714	-0.086639	0.942424	29.106	27.4095	middle
hsa-miR-15a-3p_1ss22AT	CAGGCCATATTGTGCTGCCTCT	up	1.10991	0.150439	0.94318	1.28147	1.42231	low
hsa-miR-151a-3p	CTAGACTGAAGCTCCTTGAGG	down	0.963041	-0.0543308	0.943323	1921.87	1850.84	high
PC-5p-58810_103	GGAGAATGGTCTGAGTGTG	down	0.9557	-0.0653709	0.945685	24.956	23.8505	middle
hsa-miR-30d-5p_R+2	TGTAAACATCCCCGACTGGAAGCT	up	1.02246	0.0320419	0.946272	6800.38	6953.1	high
PC-5p-352890_10	ATGGAAGCGAAGGAAACCA	up	1.10247	0.140742	0.946818	0.620216	0.683771	low
hsa-miR-885-5p	TCCATTACACTACCCTGCCTCT	up	1.10076	0.138503	0.947659	0.620216	0.682711	low
hsa-miR-1273h-3p	CTGCAGACTCGACCTCCCAGGC	down	0.931593	-0.102229	0.947757	11.065	10.3081	middle
hsa-miR-222-3p_R+4	AGCTACATCTGGCTACTGGGTCTCT	up	1.02706	0.0385231	0.947898	2447.52	2513.75	high
hsa-miR-362-3p	AACACACCTATTCAAGGATTCA	up	1.04024	0.0569205	0.949724	7.19306	7.48253	middle
hsa-miR-550a-3p	TGTCTTACTCCCTCAGGCACAT	down	0.944632	-0.0821754	0.950093	2	1.88927	low
hsa-miR-22-5p	AGTTCTTCAGTGGCAAGCTTTA	up	1.02794	0.0397538	0.950438	163.785	168.361	middle
hsa-miR-664a-3p	TATTCATTTATCCCCAGCCTACA	up	1.01833	0.0262041	0.95526	94.2563	95.9839	middle
hsa-miR-98-5p	TGAGGTAGTAAGTTGTATTGTT	down	0.970839	-0.0426965	0.955604	283.61	275.34	middle
hsa-miR-3130-5p_R+1_1ss12CT	TACCCAGTCTCTGGTGCAGCCT	down	0.922799	-0.115912	0.956156	0.310108	0.286167	low
hsa-miR-221-5p_R+2	ACCTGGCATACAATGTAGATTTCT	down	0.966885	-0.0485836	0.957282	94.3895	91.2638	middle
hsa-miR-154-5p	TAGGTTATCCGTGTTGCCTTCG	up	1.04552	0.0642239	0.961228	5.38796	5.63323	middle
hsa-miR-186-5p_R+1	CAAAGAATTCTCCTTTTGGGCTT	down	0.984014	-0.0232489	0.961638	2449	2409.85	high
hsa-miR-1292-5p_R-1	TGGGAACGGGTTCCGGCAGACGCT	down	0.932322	-0.1011	0.961739	0.854314	0.796496	low
PC-3p-311842_11	GAGGTTGGCTTAGAAGCAGC	down	0.948803	-0.07582	0.964469	2.43675	2.312	middle
hsa-miR-30e-5p_R+2	TGTAAACATCCTTGACTGGAAGCT	down	0.990294	-0.0140705	0.96468	8800.19	8714.78	high
hsa-miR-589-3p_1ss24AT	TCAGAACAAATGCCGGTTCCCAGT	up	1.06551	0.0915451	0.965345	0.320368	0.341355	low
hsa-miR-10b-5p_R-1	TACCCTGTAGAACCGAATTTGT	down	0.984736	-0.0221914	0.965571	3155.18	3107.02	high
hsa-let-7d-3p	CTATACGACCTGCTGCCTTTCT	down	0.984144	-0.0230592	0.966047	335.706	330.383	middle
hsa-miR-10527-5p_R+1	AAAGCAAATGTTGGGTGAACGGCT	up	1.03201	0.0454638	0.967998	6.27188	6.47268	middle
PC-3p-279249_13	TTACAATGGAGAGTTTGAT	up	1.05028	0.0707717	0.968211	2.68041	2.81518	middle
hsa-miR-136-5p	ACTCCATTTGTTTTGATGATGGA	up	1.03844	0.0544176	0.968262	14.1144	14.6569	middle
hsa-miR-369-3p	AATAATACATGGTTGATCTTT	up	1.03105	0.0441088	0.968939	239.371	246.802	middle
hsa-miR-152-3p	TCAGTGCATGACAGAACTTGG	up	1.01878	0.0268399	0.970393	480.353	489.373	high
hsa-miR-556-3p_R-1	ATATTACCATTAGCTCATCTT	down	0.964652	-0.0519189	0.972455	4.30445	4.15229	middle
hsa-miR-548z_1ss4AG	CAAGAACCGCAATTACTTTTGCA	down	0.957272	-0.062999	0.972457	0.507249	0.485575	low
PC-3p-84561_68	AAAGTGTGGCCTATCGATC	up	1.02256	0.032189	0.973491	21.2687	21.7486	middle
PC-3p-229747_18	AGCCTCCCAGTCTGGCCTGAGT	down	0.952796	-0.0697609	0.973577	0.800919	0.763113	low
hsa-miR-369-5p_R-1	AGATCGACCGTGTTATATTCG	down	0.965125	-0.0512118	0.973854	10.5327	10.1654	middle
hsa-miR-28-3p	CACTAGATTGTGAGCTCCTGGA	down	0.983478	-0.0240347	0.974622	434.989	427.802	high
hsa-miR-26b-3p_R+1	CCTGTTCTCCATTACTTGGCTC	up	1.02184	0.0311687	0.974988	35.2143	35.9834	middle
hsa-miR-671-3p	TCCGGTTCTCAGGGCTCCACC	down	0.973497	-0.0387522	0.975321	13.2083	12.8582	middle
hsa-miR-99b-3p_R+1	CAAGCTCGTGTCTGTGGGTCCGT	up	1.02396	0.0341546	0.975846	15.9591	16.3414	middle
hsa-miR-378a-3p	ACTGGACTTGGAGTCAGAAGGC	down	0.997794	-0.00318679	0.97663	325.741	325.023	middle
hsa-miR-26b-5p_R+1	TTCAAGTAATTCAGGATAGGTT	down	0.99053	-0.0137281	0.976741	11149.6	11044	high
hsa-miR-409-5p	AGGTTACCCGAGCAACTTTGCAT	down	0.971429	-0.0418197	0.976793	72.2571	70.1926	middle
hsa-miR-548ag_1ss4GA	AAAAGTAATTGTGGTTTCTGC	up	1.04212	0.0595222	0.97745	0.128147	0.133545	low
hsa-miR-30e-3p_1ss22CT	CTTTCAGTCGGATGTTTACAGT	down	0.991525	-0.0122792	0.977623	256.364	254.192	middle
hsa-miR-28-5p	AAGGAGCTCACAGTCTATTGAG	down	0.98566	-0.0208377	0.979449	358.434	353.294	middle
hsa-miR-625-5p_R+1	AGGGGGAAAGTTCTATAGTCCT	up	1.01452	0.0207967	0.979567	28.746	29.1634	middle
hsa-miR-381-5p_R+1	AGCGAGGTTGCCCTTTGTATATT	down	0.967683	-0.0473931	0.982041	1.28147	1.24006	low
hsa-mir-5100-p3_1ss17TC	ATCCCAGCGGTGCCTCCA	up	1.01344	0.0192542	0.986606	30.8131	31.2271	middle
hsa-miR-423-3p	AGCTCGGTCTGAGGCCCCTCAGT	down	0.991219	-0.0127238	0.987078	3836.01	3802.33	high
hsa-miR-376c-3p	AACATAGAGGAAATTCCACGT	up	1.01441	0.0206346	0.987195	47.3908	48.0735	middle
hsa-miR-148a-5p	AAAGTTCTGAGACACTCCGACT	up	1.01429	0.0204751	0.988078	7.863	7.97539	middle
hsa-miR-627-3p_L+1	CTCTTTTCTTTGAGACTCACT	up	1.0123	0.0176348	0.991374	1.70863	1.72964	low
hsa-miR-335-3p	TTTTTCATTATTGCTCCTGACC	up	1.00749	0.0107602	0.992125	108.753	109.567	middle
hsa-miR-5010-5p	AGGGGGATGGCAGAGCAAAATT	up	1.01166	0.0167288	0.992379	1.33487	1.35043	low
hsa-miR-942-5p_R+1	TCTTCTCTGTTTTGGCCATGTGT	up	1.00595	0.00856195	0.99303	20.905	21.0294	middle
hsa-miR-744-5p	TGCGGGGCTAGGGCTAACAGCA	down	0.995023	-0.00719847	0.993575	616.728	613.658	high
hsa-let-7a-3p_R+1	CTATACAATCTACTGTCTTTCT	down	0.99878	-0.00176076	0.99554	96.3996	96.2821	middle
hsa-miR-125a-5p_R-1	TCCCTGAGACCCTTTAACCTGTG	up	1.00102	0.00147337	0.996236	2662.9	2665.62	high
hsa-miR-409-3p	GAATGTTGCTCGGTGAACCCCT	down	0.996744	-0.00470457	0.997394	346.162	345.035	high
PC-3p-245072_16	AGAAATTATTCATTTGGGA	up	1.00136	0.00195819	0.999258	3.12714	3.13139	middle

## Sheet: Table S6b
Supplementary Table 6B. List of common and unique plasma exosome miRNA in old and young individuals.
331 miRNA were present in at least one condition with confidence.
miR_name	Old	Young
hsa-miR-1-3p	1	1
hsa-miR-7-5p	2	2
hsa-let-7g-5p	3	3
hsa-let-7a-5p	5	5
hsa-let-7e-5p	6	6
hsa-let-7d-5p	8	8
hsa-let-7d-3p	9	9
hsa-let-7b-5p	10	10
hsa-let-7i-5p	12	12
hsa-let-7i-3p	13	13
hsa-let-7c-5p	14	14
hsa-let-7a-3p_R+1	16	16
hsa-let-7f-5p	17	17
hsa-let-7f-2-3p_1ss22CT	19	19
hsa-miR-10b-5p_R-1	23	23
hsa-miR-10a-5p_R-1	25	25
hsa-miR-15a-5p	27	27
hsa-miR-15b-5p	29	29
hsa-miR-15b-3p_R-1	30	30
hsa-miR-16-5p	31	31
hsa-miR-16-2-3p_L+1R-1	33	33
hsa-miR-17-5p	34	34
hsa-miR-18a-5p	38	38
hsa-miR-18a-3p_1ss23GA	39	39
hsa-miR-19b-3p	40	40
hsa-miR-19a-3p	42	42
hsa-miR-20b-5p	43	43
hsa-miR-20a-5p	44	44
hsa-miR-21-5p_R+1	46	46
hsa-miR-22-5p	48	48
hsa-miR-22-3p	49	49
hsa-miR-23b-3p_R+1	51	51
hsa-miR-23a-3p_R+1	53	53
hsa-miR-24-3p	55	55
hsa-miR-24-2-5p_L+1R+1	56	56
hsa-miR-25-3p	58	58
hsa-miR-26b-5p_R+1	59	59
hsa-miR-26a-5p	61	61
hsa-miR-27b-3p	65	65
hsa-miR-27a-3p_R-1	67	67
hsa-miR-28-5p	68	68
hsa-miR-28-3p	69	69
hsa-miR-29c-3p	71	71
hsa-miR-29a-3p	73	73
hsa-miR-29b-3p	75	75
hsa-miR-30b-5p	77	77
hsa-miR-30c-5p_R+1	79	79
hsa-miR-30a-5p_R+2	82	82
hsa-miR-30a-3p	83	83
hsa-miR-30e-5p_R+2	84	84
hsa-miR-30e-3p_1ss22CT	85	85
hsa-miR-30d-5p_R+2	86	86
hsa-miR-32-5p	89	89
hsa-miR-92a-3p	98	98
hsa-miR-93-5p	99	99
hsa-miR-93-3p_R+1	100	100
hsa-miR-95-3p	101	101
hsa-miR-96-5p_R-2	102	102
hsa-miR-98-5p	103	103
hsa-miR-99a-5p_R-1	105	105
hsa-miR-99b-5p	107	107
hsa-miR-100-5p	109	109
hsa-miR-101-3p_R+1	110	110
hsa-miR-103a-3p	113	113
hsa-miR-106b-5p	115	115
hsa-miR-106b-3p_L+2R-2	116	116
hsa-miR-106a-5p	117	117
hsa-miR-107_R-2	120	120
hsa-miR-122-5p	121	121
hsa-miR-125b-5p	124	124
hsa-miR-125a-5p_R-1	126	126
hsa-miR-126-5p	128	128
hsa-miR-126-3p	129	129
hsa-miR-127-3p	131	131
hsa-miR-128-3p	133	133
hsa-miR-130a-3p	136	136
hsa-miR-135a-5p	142	142
hsa-miR-139-5p	146	146
hsa-miR-140-5p	148	148
hsa-miR-140-3p_R+1	149	149
hsa-miR-142-5p_L+2R-2	151	151
hsa-miR-142-3p_R-1	152	152
hsa-miR-143-3p_R+1	154	154
hsa-miR-144-5p_R+1	155	155
hsa-miR-144-3p	156	156
hsa-miR-146a-5p	159	159
hsa-miR-146b-5p_R+1	161	161
hsa-miR-148b-3p	164	164
hsa-miR-148a-3p	166	166
hsa-miR-150-5p	168	168
hsa-miR-150-3p_R-1	169	169
hsa-miR-151b_R+2	170	170
hsa-miR-151b_R+4	171	171
hsa-miR-151a-3p	172	172
hsa-miR-152-3p	174	174
hsa-miR-155-5p_R-1	179	179
hsa-miR-181a-5p	180	180
hsa-miR-181b-5p	182	182
hsa-miR-182-5p	189	189
hsa-miR-183-5p	191	191
hsa-miR-185-5p	194	194
hsa-miR-185-3p_R-1	195	195
hsa-miR-186-5p_R+1	196	196
hsa-miR-190a-5p_R+1	197	197
hsa-miR-191-5p	200	200
hsa-miR-192-5p	202	202
hsa-miR-194-5p	206	206
hsa-miR-195-5p_R+1	207	207
hsa-miR-197-3p	212	212
hsa-miR-199a-5p	213	213
hsa-miR-199a-3p	214	214
hsa-miR-200a-3p_R+1	218	218
hsa-miR-203a-3p_L-1	220	220
hsa-miR-221-3p	232	232
hsa-miR-222-3p_R+4	234	234
hsa-miR-223-3p_R+1	236	236
hsa-miR-224-5p_L-1	237	237
hsa-miR-301a-3p	243	243
hsa-miR-320b_R-2	247	247
hsa-miR-320a-3p	249	249
hsa-miR-320c_R+2_1ss20TA	250	250
hsa-miR-326_R+1	255	255
hsa-miR-328-3p	256	256
hsa-miR-335-5p	263	263
hsa-miR-339-5p	269	269
hsa-miR-339-3p	270	270
hsa-miR-340-5p	271	271
hsa-miR-340-3p_R+1	272	272
hsa-miR-342-3p	274	274
hsa-miR-345-5p_R+1	275	275
hsa-miR-361-5p	276	276
hsa-miR-361-3p	277	277
hsa-miR-362-5p_R-1	278	278
hsa-miR-363-3p	280	280
hsa-miR-365b-3p	281	281
hsa-miR-369-3p	283	283
hsa-miR-374b-5p	287	287
hsa-miR-374a-5p	289	289
hsa-miR-374a-3p	290	290
hsa-miR-377-3p	NA	299
hsa-miR-378a-3p	302	302
hsa-miR-423-5p	321	321
hsa-miR-423-3p	322	322
hsa-miR-424-5p_R-1	323	323
hsa-miR-425-5p	325	325
hsa-miR-450a-5p	335	335
hsa-miR-451a_R+1	339	339
hsa-mir-451a-p3	340	340
hsa-miR-454-3p	344	344
hsa-miR-484	349	349
hsa-miR-486-5p	352	352
hsa-miR-486-3p	353	353
hsa-miR-494-3p_R+1	363	363
hsa-miR-495-3p	365	365
hsa-miR-497-5p	367	367
hsa-miR-500a-3p_L+1R-2	370	370
hsa-miR-501-3p	372	372
hsa-miR-502-3p	374	374
hsa-miR-505-5p_R+1	377	377
hsa-miR-505-3p_L-1R+2	378	378
hsa-miR-532-5p	387	387
hsa-miR-548ae-5p	402	402
hsa-miR-574-3p	452	452
hsa-miR-576-5p_R+1	453	453
hsa-miR-584-5p_R-1	459	459
hsa-miR-589-5p_R-1	461	461
hsa-miR-590-3p	464	464
hsa-miR-625-3p	474	474
hsa-miR-629-5p_R+1	479	479
hsa-miR-651-5p_R-1	485	485
hsa-miR-652-3p_R+1	487	487
hsa-miR-660-5p_R+1	493	493
hsa-miR-664a-3p	496	496
hsa-miR-744-5p	504	504
hsa-miR-769-5p	511	511
hsa-miR-941	NA	520
hsa-miR-1277-5p_L-3	546	546
hsa-miR-1307-5p_R+2	565	565
hsa-miR-3615_R+1	600	600
PC-5p-4153_939	699	699
PC-5p-42160_145	749	749
PC-3p-35335_172	751	751
PC-5p-5236_793	755	755
PC-3p-5591_756	810	810
PC-5p-18955_300	NA	829
PC-5p-75280_78	831	831
PC-5p-23639_248	840	840
PC-5p-38609_158	841	841
PC-5p-1295_2421	845	845
PC-5p-16231_340	850	850
PC-3p-7094_636	NA	851
PC-3p-27756_215	855	855
PC-5p-4745_852	880	880
PC-3p-14221_378	893	893
PC-5p-118514_44	NA	894
PC-5p-82121_70	NA	905
PC-3p-51927_118	912	912
PC-3p-50517_121	922	922
PC-3p-50184_122	NA	923
PC-3p-71216_83	928	928
PC-5p-12254_424	930	930
PC-5p-74742_79	NA	961
PC-5p-63904_94	NA	962
PC-5p-109698_49	NA	966
PC-3p-22635_258	972	972
PC-3p-19334_296	976	976
PC-3p-50662_121	978	978
PC-3p-21944_265	989	989
PC-5p-16516_335	994	994
PC-5p-44881_136	1022	1022
PC-3p-52144_117	NA	1032
PC-5p-58810_103	1037	1037
PC-5p-10111_489	1052	1052
PC-3p-26027_228	1053	1053
PC-3p-50941_120	NA	1057
PC-3p-23495_250	1095	1095
PC-3p-58428_104	NA	1109
PC-3p-24680_239	1121	1121
PC-3p-24850_237	1124	1124
PC-3p-10181_486	1129	1129
PC-3p-51190_119	1130	1130
PC-5p-9705_504	1144	1144
PC-3p-84008_68	NA	1154
PC-5p-74271_79	1159	1159
PC-5p-25855_229	1169	1169
PC-5p-36534_167	1176	1176
PC-3p-58949_103	1177	1177
PC-5p-82170_70	1184	1184
PC-5p-56062_108	NA	1198
PC-5p-42119_145	1211	1211
PC-5p-21626_269	1230	1230
PC-3p-42457_144	1273	1273
PC-3p-29734_202	1279	1279
PC-5p-26928_221	1280	1280
PC-5p-32137_188	1281	1281
PC-3p-52768_116	1283	1283
PC-5p-71182_83	NA	1288
PC-3p-53936_113	1312	1312
PC-5p-125551_41	NA	1314
PC-3p-9170_526	1334	1334
PC-3p-10257_484	1348	1348
PC-3p-19775_291	1356	1356
PC-3p-5723_744	1371	1371
hsa-miR-9-5p	21	NA
hsa-miR-10b-3p	24	NA
hsa-miR-17-3p_R+1	35	NA
hsa-miR-21-3p	47	NA
hsa-miR-26b-3p_R+1	60	NA
hsa-miR-27a-5p	66	NA
hsa-miR-31-5p_R+1_1ss11CT	88	NA
hsa-miR-106a-3p_L+2R-3	118	NA
hsa-miR-130b-5p_R+1	134	NA
hsa-miR-130b-3p	135	NA
hsa-miR-133a-3p_R+1	140	NA
hsa-miR-134-5p	141	NA
hsa-miR-136-3p_L-1	145	NA
hsa-miR-139-3p	147	NA
hsa-miR-145-5p	157	NA
hsa-miR-146b-3p	162	NA
hsa-miR-148b-5p_L+1R+1	163	NA
hsa-miR-181d-5p_R+1	187	NA
hsa-miR-181a-3p	188	NA
hsa-miR-199b-5p_R-1	215	NA
hsa-miR-200b-3p	216	NA
hsa-miR-200c-3p	217	NA
hsa-miR-204-5p	221	NA
hsa-miR-205-5p_R-1	222	NA
hsa-miR-210-3p	223	NA
hsa-miR-221-5p_R+2	231	NA
hsa-miR-223-5p_R+1	235	NA
hsa-miR-301a-5p	242	NA
hsa-miR-320c_1ss20TA	245	NA
hsa-miR-324-3p_L-3R+1	254	NA
hsa-miR-331-3p_R+1	262	NA
hsa-miR-335-3p	264	NA
hsa-miR-338-5p_R-1	267	NA
hsa-miR-338-3p_R+1	268	NA
hsa-miR-370-3p	285	NA
hsa-miR-374b-3p	288	NA
hsa-miR-376c-3p	293	NA
hsa-miR-378c_R-5	303	NA
hsa-miR-381-3p	311	NA
hsa-miR-382-5p	312	NA
hsa-miR-409-3p	315	NA
hsa-miR-410-3p	316	NA
hsa-miR-425-3p_L+1R-1	326	NA
hsa-miR-450b-5p_R-1	338	NA
hsa-miR-483-5p	347	NA
hsa-miR-487b-3p	357	NA
hsa-miR-493-5p	361	NA
hsa-miR-532-3p	388	NA
hsa-mir-548ax-p3	422	NA
hsa-miR-548ap-5p_R+3	423	NA
hsa-miR-548e-3p	439	NA
hsa-miR-582-5p	458	NA
hsa-miR-628-3p_R+2	478	NA
hsa-miR-641_R+1	481	NA
hsa-miR-654-3p_R-2	490	NA
hsa-miR-656-3p	492	NA
hsa-miR-664a-5p_R-2	495	NA
hsa-miR-874-3p_R+1	513	NA
hsa-miR-1260a_1ss9TG	538	NA
hsa-miR-1260b_R-1_1ss9AG	539	NA
hsa-miR-1271-5p	541	NA
hsa-miR-1277-3p_R-1	547	NA
hsa-miR-1296-5p	556	NA
hsa-miR-1301-3p_R+1	558	NA
hsa-miR-1307-3p_R+1	566	NA
hsa-miR-2110_R+1	575	NA
hsa-miR-4433b-5p_R+1	617	NA
hsa-miR-5010-3p_R+1	651	NA
hsa-miR-12136_R+8	695	NA
PC-5p-25715_230	697	NA
PC-5p-113093_47	706	NA
PC-3p-153251_31	737	NA
PC-3p-103316_53	745	NA
PC-3p-34155_178	763	NA
PC-3p-8403_561	765	NA
PC-5p-74094_79	766	NA
PC-3p-84574_68	793	NA
PC-3p-61957_97	800	NA
PC-3p-65893_91	969	NA
PC-3p-54636_111	985	NA
PC-3p-144483_34	996	NA
PC-3p-84561_68	997	NA
PC-3p-7719_599	1014	NA
PC-5p-94607_59	1079	NA
PC-3p-73204_81	1163	NA
PC-3p-69211_86	1209	NA
PC-5p-146166_33	1212	NA
PC-5p-52432_116	1252	NA

## Sheet: Table S6c
Supplementary Table 6C. List of significantly altered miRNA in the plasma exosome from old and young individuals (Old/Young).
6 miRNA were significantly altered.
miRNA annotation	miRNA sequence	Foldchange	P value
		(Old/Young)
PC-3p-73204_81	TAGCACCATCTGAAATCGGTTAAA	5.04	0.0001
PC-3p-7719_599	TCGACTCCCGGTATGGGAACCA	1.98	0.02
hsa-miR-27a-5p	AGGGCTTAGCTGCTTGTGAGCA	3.17	0.03
hsa-miR-874-3p_R+1	CTGCCCTGGCCCGAGGGACCGAC	2.08	0.04
hsa-miR-190a-5p_R+1	TGATATGTTTGATATATTAGGTT	0.64	0.04
PC-3p-8403_561	TCGACTCCCGGTGTGGGAAC	3.61	0.05

## Sheet: Table S6d
Supplementary Table 6D. List of common and unique miRNA in exosome from plasma of old individuals and senescent IMR90 cells (all three conditions).
261 elements included exclusively in "Senescence":	11 common elements in "Senescence" and "Aging":	58 elements included exclusively in "Aging":
hsa-miR-449a	hsa-miR-483-5p	hsa-miR-9-5p
hsa-miR-449c	hsa-miR-2110	hsa-miR-10b-3p
hsa-miR-129-5p	hsa-miR-532-3p	hsa-miR-17-3p
hsa-miR-765	hsa-miR-654-3p	hsa-miR-21-3p
hsa-miR-375	hsa-miR-409-3p	hsa-miR-26b-3p
hsa-miR-184	hsa-miR-199b-5p	hsa-miR-27a-5p
hsa-miR-1290	hsa-miR-146b-3p	hsa-miR-31-5p
hsa-miR-3656	hsa-miR-641	hsa-miR-106a-3p
hsa-miR-126	hsa-miR-324-3p	hsa-miR-130b-5p
hsa-miR-217	hsa-miR-450b-5p	hsa-miR-130b-3p
hsa-miR-1246	hsa-miR-1260b	hsa-miR-133a-3p
hsa-miR-129-3p		hsa-miR-134-5p
hsa-miR-432		hsa-miR-136-3p
hsa-miR-1197		hsa-miR-139-3p
hsa-miR-584		hsa-miR-145-5p
hsa-miR-1274a		hsa-miR-148b-5p
hsa-miR-1275		hsa-miR-181d-5p
hsa-miR-449b		hsa-miR-181a-3p
hsa-miR-3911		hsa-miR-200b-3p
hsa-miR-1274b		hsa-miR-200c-3p
hsa-miR-122		hsa-miR-204-5p
hsa-miR-668		hsa-miR-205-5p
hsa-miR-323b-3p		hsa-miR-210-3p
hsa-miR-491-5p		hsa-miR-221-5p
hsa-miR-539		hsa-miR-223-5p
hsa-miR-496		hsa-miR-301a-5p
hsa-miR-541		hsa-miR-320c
hsa-miR-323b-5p		hsa-miR-331-3p
hsa-miR-1293		hsa-miR-335-3p
hsa-miR-664		hsa-miR-338-5p
hsa-miR-1268		hsa-miR-338-3p
hsa-miR-654-5p		hsa-miR-370-3p
hsa-miR-210		hsa-miR-374b-3p
hsa-miR-543		hsa-miR-376c-3p
hsa-miR-628-5p		hsa-miR-378c
hsa-miR-3180		hsa-miR-381-3p
hsa-miR-3180-3p		hsa-miR-382-5p
hsa-miR-330-5p		hsa-miR-410-3p
hsa-miR-30e		hsa-miR-425-3p
hsa-miR-323-5p		hsa-miR-487b-3p
hsa-miR-369-3p		hsa-miR-493-5p
hsa-miR-935		hsa-mir-548ax-p3
hsa-miR-323-3p		hsa-miR-548ap-5p
hsa-miR-3909		hsa-miR-548e-3p
hsa-miR-337-3p		hsa-miR-582-5p
hsa-miR-889		hsa-miR-628-3p
hsa-miR-137		hsa-miR-656-3p
hsa-miR-874		hsa-miR-664a-5p
hsa-miR-185		hsa-miR-874-3p
hsa-miR-493		hsa-miR-1260a
hsa-miR-589		hsa-miR-1271-5p
hsa-miR-224		hsa-miR-1277-3p
hsa-miR-758		hsa-miR-1296-5p
hsa-miR-410		hsa-miR-1301-3p
hsa-miR-127-3p		hsa-miR-1307-3p
hsa-miR-656		hsa-miR-4433b-5p
hsa-miR-30a		hsa-miR-5010-3p
hsa-miR-23c		hsa-miR-12136
hsa-miR-30d
hsa-miR-24
hsa-miR-494
hsa-miR-1294
hsa-miR-27a
hsa-miR-495
hsa-miR-379
hsa-miR-98
hsa-miR-1307
hsa-miR-370
hsa-miR-23a
hsa-miR-23b
hsa-miR-125a-5p
hsa-miR-326
hsa-miR-409-5p
hsa-miR-27b
hsa-miR-485-5p
hsa-miR-660
hsa-miR-128
hsa-miR-487b
hsa-miR-486-5p
hsa-miR-369-5p
hsa-miR-433
hsa-miR-1273d
hsa-miR-501-3p
hsa-miR-3605-5p
hsa-miR-31
hsa-miR-222
hsa-miR-193a-5p
hsa-miR-3679-5p
hsa-miR-1185
hsa-miR-181b
hsa-miR-221
hsa-miR-502-3p
hsa-miR-134
hsa-miR-125b
hsa-miR-181d
hsa-miR-329
hsa-miR-320e
hsa-miR-431
hsa-miR-411
hsa-let-7i
hsa-miR-1301
hsa-miR-3177
hsa-miR-320d
hsa-miR-487a
hsa-miR-3190
hsa-miR-30c
hsa-miR-452
hsa-miR-421
hsa-let-7d
hsa-miR-34a
hsa-miR-380
hsa-miR-486-3p
hsa-miR-769-5p
hsa-miR-127-5p
hsa-miR-328
hsa-miR-152
hsa-miR-151-5p
hsa-miR-149
hsa-miR-2355-3p
hsa-miR-3167
hsa-miR-382
hsa-miR-532-5p
hsa-miR-3124
hsa-miR-362-5p
hsa-miR-197
hsa-miR-339-3p
hsa-miR-744
hsa-let-7e
hsa-miR-665
hsa-miR-154
hsa-miR-148b
hsa-miR-377
hsa-miR-378
hsa-miR-181a
hsa-miR-548i
hsa-miR-299-5p
hsa-miR-549
hsa-miR-551b
hsa-miR-1245
hsa-miR-766
hsa-miR-296-3p
hsa-miR-33b
hsa-miR-218
hsa-miR-3622a-5p
hsa-miR-145
hsa-miR-497
hsa-miR-19b
hsa-miR-19a
hsa-miR-1270
hsa-miR-548u
hsa-miR-15a
hsa-miR-155
hsa-miR-16
hsa-miR-3912
hsa-miR-576-5p
hsa-miR-3154
hsa-miR-17
hsa-miR-15b
hsa-miR-20a
hsa-miR-148a
hsa-miR-106a
hsa-miR-18a
hsa-miR-1261
hsa-miR-196a
hsa-miR-1271
hsa-miR-296-5p
hsa-miR-887
hsa-miR-18b
hsa-miR-345
hsa-miR-195
hsa-miR-3187
hsa-miR-146a
hsa-miR-490-5p
hsa-miR-106b
hsa-miR-34c-5p
hsa-miR-1302
hsa-miR-548z
hsa-miR-196b
hsa-miR-92a
hsa-miR-490-3p
hsa-miR-33a
hsa-miR-3170
hsa-miR-7
hsa-miR-3158
hsa-miR-93
hsa-miR-1255a
hsa-miR-3130-3p
hsa-miR-1254
hsa-miR-671-5p
hsa-miR-629
hsa-miR-505
hsa-miR-3913
hsa-miR-548p
hsa-miR-424
hsa-miR-548k
hsa-miR-3129
hsa-miR-146b-5p
hsa-miR-548a-3p
hsa-miR-1296
hsa-miR-3164
hsa-miR-576-3p
hsa-miR-25
hsa-miR-3928
hsa-miR-383
hsa-miR-3151
hsa-miR-3200-5p
hsa-miR-598
hsa-miR-130b
hsa-miR-652
hsa-miR-378b
hsa-miR-3174
hsa-miR-1908
hsa-miR-3136
hsa-miR-143
hsa-miR-342-5p
hsa-miR-342-3p
hsa-miR-942
hsa-miR-190
hsa-miR-548e
hsa-miR-1278
hsa-miR-1273c
hsa-miR-199a-3p
hsa-miR-199b-3p
hsa-miR-4286
hsa-miR-548b-5p
hsa-miR-3127
hsa-miR-331-5p
hsa-miR-219-1-3p
hsa-miR-708
hsa-miR-625
hsa-miR-720
hsa-miR-425
hsa-miR-1256
hsa-miR-3145
hsa-miR-548n
hsa-miR-455-3p
hsa-miR-3615
hsa-miR-1262
hsa-miR-301b
hsa-miR-301a
hsa-miR-361-5p
hsa-miR-192
hsa-miR-32
hsa-miR-212
hsa-miR-454
hsa-miR-503
hsa-miR-542-5p
hsa-miR-215
hsa-miR-194
hsa-miR-423-3p
hsa-miR-1304
hsa-miR-361-3p
hsa-miR-1260
hsa-miR-193a-3p
hsa-miR-374b
hsa-miR-1285
hsa-miR-548o
hsa-miR-643
hsa-miR-219-5p
hsa-miR-28-3p
hsa-miR-324-5p

## Sheet: Table S6e
Supplementary Table 6E. List of common and unique miRNA in plasma and plasma exosome from old individuals.
356 elements included exclusively in "Plasma":	20 common elements in "Plasma" and "Plasma exosome":	50 elements included exclusively in "Plasma exosome":
hsa-miR-625-5p	hsa-miR-145-5p	hsa-miR-9-5p
hsa-miR-130a-3p	hsa-miR-487b-3p	hsa-miR-10b-3p
hsa-miR-199a-3p	hsa-miR-1307-3p	hsa-miR-17-3p
hsa-miR-199b-3p	hsa-miR-130b-3p	hsa-miR-21-3p
hsa-miR-328-5p	hsa-miR-425-3p	hsa-miR-26b-3p
hsa-miR-6752-5p	hsa-miR-376c-3p	hsa-miR-27a-5p
hsa-miR-143-3p	hsa-miR-200c-3p	hsa-miR-31-5p
hsa-miR-6816-5p	hsa-miR-628-3p	hsa-miR-106a-3p
hsa-miR-27a-3p	hsa-miR-181d-5p	hsa-miR-130b-5p
hsa-miR-451a	hsa-miR-210-3p	hsa-miR-133a-3p
hsa-miR-15a-5p	hsa-miR-331-3p	hsa-miR-134-5p
hsa-miR-494-3p	hsa-miR-338-5p	hsa-miR-136-3p
hsa-miR-6794-5p	hsa-miR-324-3p	hsa-miR-139-3p
hsa-miR-3656	hsa-miR-370-3p	hsa-miR-146b-3p
hsa-miR-1228-5p	hsa-miR-378c	hsa-miR-148b-5p
hsa-miR-6798-5p	hsa-miR-654-3p	hsa-miR-181a-3p
hsa-miR-222-3p	hsa-miR-1260b	hsa-miR-199b-5p
hsa-miR-106b-5p	hsa-miR-1260a	hsa-miR-200b-3p
hsa-miR-486-3p	hsa-miR-4433b-5p	hsa-miR-204-5p
hsa-miR-106b-3p	hsa-miR-450b-5p	hsa-miR-205-5p
hsa-miR-3135b		hsa-miR-221-5p
hsa-miR-28-5p		hsa-miR-223-5p
hsa-miR-4467		hsa-miR-301a-5p
hsa-miR-532-5p		hsa-miR-320c
hsa-miR-6805-5p		hsa-miR-335-3p
hsa-miR-199a-5p		hsa-miR-338-3p
hsa-miR-223-3p		hsa-miR-374b-3p
hsa-let-7g-5p		hsa-miR-381-3p
hsa-miR-6771-5p		hsa-miR-382-5p
hsa-miR-6722-3p		hsa-miR-409-3p
hsa-miR-127-3p		hsa-miR-410-3p
hsa-miR-4651		hsa-miR-483-5p
hsa-miR-339-3p		hsa-miR-493-5p
hsa-miR-6743-5p		hsa-miR-532-3p
hsa-miR-421		hsa-mir-548ax-p3
hsa-miR-6821-5p		hsa-miR-548ap-5p
hsa-miR-1207-5p		hsa-miR-548e-3p
hsa-miR-146b-5p		hsa-miR-582-5p
hsa-miR-6789-5p		hsa-miR-641
hsa-miR-4649-5p		hsa-miR-656-3p
hsa-miR-378a-3p		hsa-miR-664a-5p
hsa-miR-6786-5p		hsa-miR-874-3p
hsa-miR-379-5p		hsa-miR-1271-5p
hsa-miR-4433b-3p		hsa-miR-1277-3p
hsa-miR-433-3p		hsa-miR-1296-5p
hsa-miR-4459		hsa-miR-1301-3p
hsa-miR-484		hsa-miR-2110
hsa-miR-4463		hsa-miR-5010-3p
hsa-miR-629-5p		hsa-miR-12136
hsa-miR-27b-3p		hsa-miR-190a-5p
hsa-miR-431-5p
hsa-miR-6858-5p
hsa-miR-4516
hsa-miR-3196
hsa-miR-1275
hsa-miR-152-3p
hsa-miR-30a-5p
hsa-miR-7641
hsa-miR-7150
hsa-miR-1268b
hsa-miR-29a-3p
hsa-miR-6765-5p
hsa-miR-3175
hsa-miR-663a
hsa-miR-7107-5p
hsa-miR-485-5p
hsa-miR-1343-5p
hsa-miR-330-3p
hsa-miR-4330
hsa-miR-4443
hsa-miR-18b-5p
hsa-miR-3940-5p
hsa-miR-339-5p
hsa-miR-30c-5p
hsa-miR-6891-5p
hsa-miR-181b-5p
hsa-miR-502-3p
hsa-miR-3621
hsa-miR-574-3p
hsa-miR-4508
hsa-miR-6787-5p
hsa-miR-140-3p
hsa-miR-148b-3p
hsa-miR-1227-5p
hsa-miR-6775-5p
hsa-miR-1469
hsa-miR-493-3p
hsa-miR-6724-5p
hsa-miR-6749-5p
hsa-miR-4281
hsa-miR-6085
hsa-miR-2277-5p
hsa-miR-151b
hsa-miR-1185-1-3p
hsa-miR-18a-5p
hsa-miR-4433-3p
hsa-miR-195-5p
hsa-miR-20b-5p
hsa-miR-3620-5p
hsa-miR-328-3p
hsa-miR-30b-5p
hsa-miR-21-5p
hsa-miR-1973
hsa-miR-128-3p
hsa-miR-4635
hsa-miR-194-5p
hsa-miR-500a-3p
hsa-miR-182-5p
hsa-miR-4739
hsa-miR-3651
hsa-miR-320e
hsa-miR-4488
hsa-miR-668-5p
hsa-miR-30e-5p
hsa-miR-505-5p
hsa-miR-4306
hsa-miR-149-3p
hsa-miR-4674
hsa-miR-335-5p
hsa-miR-4749-5p
hsa-miR-378h
hsa-miR-3180-3p
hsa-miR-487a-3p
hsa-miR-495-3p
hsa-miR-4745-5p
hsa-miR-125b-5p
hsa-miR-503-5p
hsa-miR-19a-3p
hsa-miR-6848-5p
hsa-miR-6750-5p
hsa-miR-6802-5p
hsa-miR-1184
hsa-miR-939-5p
hsa-miR-6852-5p
hsa-miR-7704
hsa-miR-4706
hsa-miR-766-5p
hsa-miR-487a-5p
hsa-miR-345-5p
hsa-miR-92b-3p
hsa-miR-6870-5p
hsa-miR-28-3p
hsa-miR-1233-5p
hsa-miR-423-3p
hsa-miR-1268a
hsa-miR-1908-5p
hsa-miR-501-3p
hsa-miR-6125
hsa-miR-584-3p
hsa-miR-762
hsa-miR-6784-5p
hsa-miR-19b-3p
hsa-miR-491-5p
hsa-miR-4787-5p
hsa-miR-6799-5p
hsa-miR-30b-3p
hsa-miR-4440
hsa-miR-1185-2-3p
hsa-miR-4492
hsa-miR-6846-5p
hsa-miR-4655-5p
hsa-miR-937-5p
hsa-miR-6803-5p
hsa-miR-6782-5p
hsa-miR-4707-5p
hsa-miR-6756-5p
hsa-miR-8072
hsa-miR-2861
hsa-miR-6729-5p
hsa-miR-4689
hsa-miR-4417
hsa-miR-1273h-5p
hsa-miR-6769b-5p
hsa-miR-4270
hsa-miR-2392
hsa-miR-4695-5p
hsa-miR-654-5p
hsa-miR-3960
hsa-miR-23a-5p
hsa-miR-6132
hsa-miR-93-3p
hsa-miR-3141
hsa-miR-4284
hsa-miR-363-3p
hsa-miR-26b-5p
hsa-miR-6089
hsa-miR-7108-5p
hsa-miR-376a-3p
hsa-miR-6090
hsa-miR-485-3p
hsa-miR-6716-5p
hsa-miR-4446-3p
hsa-miR-3617-5p
hsa-miR-6727-5p
hsa-miR-543
hsa-miR-1237-5p
hsa-miR-4253
hsa-miR-7109-5p
hsa-miR-6741-5p
hsa-miR-3619-5p
hsa-miR-4525
hsa-miR-4466
hsa-miR-498
hsa-miR-6735-5p
hsa-miR-377-5p
hsa-miR-365b-5p
hsa-miR-224-5p
hsa-miR-4507
hsa-miR-30e-3p
hsa-miR-5196-5p
hsa-miR-4728-5p
hsa-miR-6068
hsa-miR-8089
hsa-miR-6819-5p
hsa-miR-550a-3-5p
hsa-miR-664b-5p
hsa-miR-6515-5p
hsa-miR-185-3p
hsa-miR-4730
hsa-miR-6087
hsa-miR-6861-5p
hsa-miR-4478
hsa-miR-6887-5p
hsa-miR-8071
hsa-miR-6516-5p
hsa-miR-324-5p
hsa-miR-4539
hsa-miR-548an
hsa-miR-154-5p
hsa-miR-7847-3p
hsa-miR-766-3p
hsa-miR-6808-5p
hsa-miR-301a-3p
hsa-miR-4299
hsa-miR-550a-5p
hsa-miR-3677-5p
hsa-miR-7854-3p
hsa-miR-6845-5p
hsa-miR-29c-3p
hsa-miR-1909-3p
hsa-miR-1912
hsa-miR-4717-3p
hsa-miR-6849-3p
hsa-miR-6781-5p
hsa-miR-550b-2-5p
hsa-miR-4715-5p
hsa-miR-6812-5p
hsa-miR-3665
hsa-miR-5187-5p
hsa-miR-665
hsa-miR-4669
hsa-miR-6510-5p
hsa-miR-563
hsa-miR-92b-5p
hsa-miR-3190-5p
hsa-miR-6865-5p
hsa-miR-4732-5p
hsa-miR-3177-3p
hsa-miR-140-5p
hsa-miR-1285-3p
hsa-miR-5680
hsa-miR-7106-5p
hsa-miR-132-3p
hsa-miR-6850-5p
hsa-miR-6879-5p
hsa-miR-6165
hsa-miR-6863
hsa-miR-1253
hsa-miR-6815-5p
hsa-miR-337-5p
hsa-miR-3125
hsa-miR-3124-5p
hsa-miR-4785
hsa-miR-6777-5p
hsa-miR-4722-5p
hsa-miR-3162-5p
hsa-miR-4656
hsa-miR-6877-5p
hsa-miR-1913
hsa-miR-3615
hsa-miR-1273h-3p
hsa-miR-6505-3p
hsa-miR-602
hsa-miR-4503
hsa-miR-516a-5p
hsa-miR-4707-3p
hsa-miR-6748-5p
hsa-miR-6127
hsa-miR-6796-5p
hsa-miR-6727-3p
hsa-miR-4456
hsa-miR-548b-5p
hsa-miR-376b-5p
hsa-miR-3978
hsa-miR-4315
hsa-miR-545-5p
hsa-miR-4664-3p
hsa-miR-5588-3p
hsa-miR-3688-5p
hsa-miR-1263
hsa-miR-6507-5p
hsa-miR-6731-5p
hsa-miR-3679-3p
hsa-miR-4723-3p
hsa-miR-6737-3p
hsa-miR-6715a-3p
hsa-miR-3152-3p
hsa-miR-4518
hsa-miR-3942-3p
hsa-miR-3131
hsa-miR-513b-5p
hsa-miR-4502
hsa-miR-1292-3p
hsa-miR-4439
hsa-miR-718
hsa-miR-7111-3p
hsa-miR-579-3p
hsa-miR-937-3p
hsa-miR-4521
hsa-miR-8074
hsa-miR-212-5p
hsa-miR-4668-3p
hsa-miR-548ar-5p
hsa-miR-4687-5p
hsa-miR-3622a-3p
hsa-miR-96-5p
hsa-miR-1229-5p
hsa-miR-4327
hsa-miR-151a-5p
hsa-miR-146a-5p
hsa-miR-6800-3p
hsa-miR-92a-3p
hsa-miR-940
hsa-miR-6858-3p
hsa-miR-486-5p
hsa-let-7e-5p
hsa-miR-2115-5p
hsa-let-7b-5p
hsa-miR-4530
hsa-miR-3178
hsa-miR-3921
hsa-miR-16-2-3p
hsa-miR-25-3p
hsa-miR-6808-3p
hsa-miR-4663
hsa-let-7d-5p
hsa-miR-5000-5p
hsa-let-7c-5p
hsa-miR-3613-5p
hsa-miR-1281
hsa-let-7a-5p
hsa-miR-6806-3p
hsa-miR-4485
hsa-miR-455-3p
hsa-miR-6716-3p
hsa-miR-122-5p
